# Supplementary material for: Exploring the impact of trifluoromethyl (–CF3) functional group on the anti-cancer activity of isoxazole-based molecules: design, synthesis, biological evaluation and molecular docking analysis
Source: Royal Society of Chemistry journal article supplement (doi:10.1039/d4ra02856b), 2024-01-01
Supplement: d4ra02856b1.pdf [file d4ra02856b1.pdf]

## Supporting Information

### Exploring the impact of trifluoromethyl (-CF<sub>3</sub>) functional group on the anti-cancer activity of isoxazole-based molecules: Design, synthesis, biological evaluation, and molecular docking analysis

Paramita Pattanayak,<sup>a</sup> Sripathi Nikhitha,<sup>b</sup> Debojyoti Halder,<sup>b</sup> Balaram Ghosh<sup>b\*</sup> and Tanmay Chatterjee<sup>a\*</sup>

<sup>a</sup>Department of Chemistry, Birla Institute of Technology and Science, Pilani (BITS Pilani), Hyderabad Campus, Jawahar Nagar, Hyderabad 500078, Telangana, India.

<sup>b</sup>Department of Pharmacy, Birla Institute of Technology and Science, Pilani (BITS Pilani), Hyderabad Campus, Jawahar Nagar, Hyderabad 500078, Telangana, India.

#### Table of Contents

|                                                                                 |    |
|---------------------------------------------------------------------------------|----|
| 1. Analytical data for all synthesized molecules. ....                          | 2  |
| 2. <sup>1</sup> H and <sup>13</sup> C Spectra of all synthesized compounds..... | 6  |
| 3. HRMS spectra of 2a-2g, 4.....                                                | 41 |
| 4. Docking.....                                                                 | 47 |
| 5. References .....                                                             | 48 |

### 1. Analytical data of all synthesized compounds.

All the synthesized compounds were synthesized following our previously developed protocol and the compounds were characterized by  $^1\text{H}$  NMR and  $^{13}\text{C}$  NMR which matched with the literature.<sup>1</sup> The new compound, **2f** was characterized by  $^1\text{H}$  NMR and  $^{13}\text{C}$  NMR and HRMS analysis.

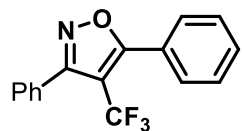

**3,5-Diphenyl-4-(trifluoromethyl)isoxazole (2a):** White solid ( 0.101 g, 70%); eluent 2% EtOAc/hexane; mp = 60 - 65 °C;  $^1\text{H}$  NMR (400 MHz,  $\text{CDCl}_3$ )  $\delta$  7.64 (d,  $J$  = 6.8 Hz, 2H), 7.60 – 7.54 (m, 2H), 7.42 (t,  $J$  = 1.8 Hz, 2H), 7.39 (m, 4H);  $^{13}\text{C}\{^1\text{H}\}$  NMR (101 MHz,  $\text{CDCl}_3$ )  $\delta$  171.26, 161.63, 131.51, 130.25, 128.72, 128.58, 127.56, 126.01,

121.72(q,  $J$  = 269.67 Hz,  $\text{CF}_3$ ), 106.38(q,  $J$  = 38.38 Hz, C- $\text{CF}_3$ );  $^{19}\text{F}$  NMR (377 MHz,  $\text{CDCl}_3$ )  $\delta$  -53.70. The assignment is supported by an X-ray crystallographic structure determination (CCDC 2216331).

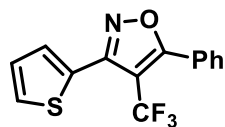

**5-Phenyl-3-(thiophen-2-yl)-4-(trifluoromethyl)isoxazole (2b):** White crystalline solid ( 0.082 g, 55%); eluent 2% EtOAc/hexane; mp = 65 - 69 °C;  $^1\text{H}$  NMR (400 MHz,  $\text{CDCl}_3$ )  $\delta$  7.70 (d,  $J$  = 7.3 Hz, 2H), 7.61 – 7.49 (m, 5H), 7.19 (dd,  $J$  = 5.1, 3.7 Hz, 1H);  $^{13}\text{C}\{^1\text{H}\}$  NMR (101 MHz,  $\text{CDCl}_3$ )  $\delta$  170.68, 154.87, 130.58, 128.78, 128.75, 127.91, 127.79, 127.68, 126.85, 126.34, 124.88, 120.55(q,  $J$  = 269.67 Hz,  $\text{CF}_3$ ), 104.64(q,  $J$  = 38.38 Hz, C- $\text{CF}_3$ );  $^{19}\text{F}$  NMR (377

MHz,  $\text{CDCl}_3$ )  $\delta$  -54.68. HRMS (ESI),  $m/z$  calcd for  $\text{C}_{14}\text{H}_9\text{F}_3\text{NOS}$  [ $\text{M} + \text{H}$ ] $^+$ : 296.0357; found: 296.0539.

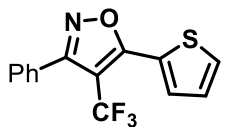

**3-Phenyl-5-(thiophen-2-yl)-4-(trifluoromethyl)isoxazole (2c):** Light yellow solid ( 0.085 g, 58%); eluent 2% EtOAc/hexane; mp = 60 - 64 °C;  $^1\text{H}$  NMR (400 MHz,  $\text{CDCl}_3$ )  $\delta$  7.72 (d,  $J$  = 3.8 Hz, 1H), 7.66 – 7.62 (m, 3H), 7.53 – 7.50 (m, 3H), 7.22 (dd,  $J$  = 5.0, 3.8 Hz, 1H);  $^{13}\text{C}\{^1\text{H}\}$  NMR (101 MHz,  $\text{CDCl}_3$ )  $\delta$  164.43, 160.85, 130.00, 129.28, 127.87, 127.55, 127.14, 126.36, 125.21, 120.67(q,  $J$  = 268.66 Hz,  $\text{CF}_3$ ), 103.90(q,  $J$  = 39.39 Hz, C- $\text{CF}_3$ );  $^{19}\text{F}$  NMR (377

MHz,  $\text{CDCl}_3$ )  $\delta$  -54.15. HRMS (ESI),  $m/z$  calcd for  $\text{C}_{14}\text{H}_9\text{F}_3\text{NOS}$  [ $\text{M} + \text{H}$ ] $^+$ : 296.0357; found: 296.0539.

**3-(Naphthalen-1-yl)-5-(thiophen-2-yl)-4-(trifluoromethyl)isoxazole (2d):** Yellow liquid ( 0.078 g, 45%); eluent 2% EtOAc/hexane;

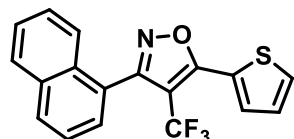

$^1\text{H NMR}$  (400 MHz,  $\text{CDCl}_3$ )  $\delta$  8.04 – 8.00 (m, 1H), 7.96 – 7.92 (m, 1H), 7.81 (d,  $J = 3.7$  Hz, 1H), 7.81 – 7.76 (m, 1H), 7.69 (dd,  $J = 5.0, 1.0$  Hz, 1H), 7.62 – 7.57 (m, 2H), 7.56 – 7.53 (m, 2H), 7.26 – 7.23 (m, 1H);  $^{13}\text{C}\{^1\text{H}\}$  NMR (101 MHz,  $\text{CDCl}_3$ )  $\delta$  164.18, 159.70, 132.35, 130.83, 130.16, 129.95, 129.52, 127.34, 127.31, 127.07, 125.98, 125.37, 125.25, 123.90, 123.86, 123.70, 120.53(q,  $J = 268.66$  Hz,  $\text{CF}_3$ ), 105.79(q,  $J = 38.38$  Hz, C-

$\text{CF}_3$ );  $^{19}\text{F NMR}$  (377 MHz,  $\text{CDCl}_3$ )  $\delta$  -55.26. Anal. Calcd for  $\text{C}_{18}\text{H}_{10}\text{F}_3\text{NOS}$ : C, 62.60; H, 2.92; N, 4.06; S, 9.28. Found: C, 62.50; H, 2.82; N, 4.0; S, 9.18.

**5-(Furan-2-yl)-3-(thiophen-2-yl)-4-(trifluoromethyl)isoxazole (2e):** White crystalline solid ( 0.057 g, 40%); eluent 2%

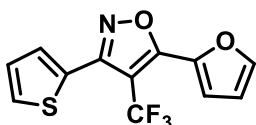

EtOAc/hexane; mp = 66 - 70 °C;  $^1\text{H NMR}$  (400 MHz,  $\text{CDCl}_3$ )  $\delta$  7.70 (d,  $J = 1.1$  Hz, 1H), 7.55 (d,  $J = 3.7$  Hz, 1H), 7.51 (d,  $J = 5.1$  Hz, 1H), 7.23 – 7.11 (m, 2H), 6.63 (dd,  $J = 3.6, 1.8$  Hz, 1H);  $^{13}\text{C}\{^1\text{H}\}$  NMR (101 MHz,  $\text{CDCl}_3$ )  $\delta$  160.50, 154.78, 145.15, 139.26, 128.96, 127.78, 126.83, 125.82, 120.31(q,  $J = 268.66$  Hz,  $\text{CF}_3$ ), 114.79, 111.22;  $^{19}\text{F NMR}$  (377 MHz,  $\text{CDCl}_3$ )  $\delta$  -54.84. HRMS (ESI),  $m/z$  calcd for  $\text{C}_{12}\text{H}_7\text{F}_3\text{NO}_2\text{S}$  [ $\text{M} + \text{H}$ ] $^+$ : 286.0150; found: 286.9966.

**3-(Furan-2-yl)-5-(thiophen-2-yl)-4-(trifluoromethyl)isoxazole (2f).**  $^1\text{H NMR}$  (400 MHz,  $\text{CDCl}_3$ )  $\delta$  7.72 – 7.62 (m, 3H), 7.21 (dd,  $J$

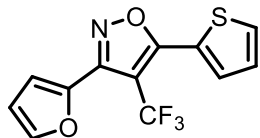

= 5.0, 3.8 Hz, 1H), 7.02 (d,  $J = 3.5$  Hz, 1H), 6.57 (dd,  $J = 3.5, 1.8$  Hz, 1H);  $^{13}\text{C NMR}$  (101 MHz,  $\text{CDCl}_3$ )  $\delta$  165.40, 152.78, 144.95, 141.12, 131.49, 131.17, 128.07, 125.73, 122.66, 120.00, 113.50, 111.68, 77.00. HRMS (ESI):  $m/z$  calcd for  $\text{C}_{12}\text{H}_7\text{F}_3\text{NO}_2\text{S}$  [ $\text{M} + \text{H}$ ] $^+$ , 286.0150; found, 286.0288.

**3-(3,4-Dimethoxyphenyl)-5-(thiophen-2-yl)-4-(trifluoromethyl)isoxazole (2g):** White solid ( 0.098 g, 55%); eluent 2%

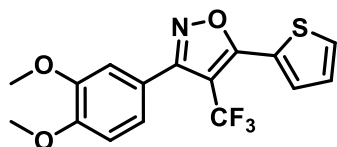

EtOAc/hexane; mp = 106 - 110 °C;  $^1\text{H NMR}$  (400 MHz,  $\text{CDCl}_3$ )  $\delta$  7.69 (d,  $J = 3.8$  Hz, 1H), 7.64 (dd,  $J = 5.1, 1.1$  Hz, 1H), 7.24 – 7.21 (m, 1H), 7.20 (dd,  $J = 4.0, 2.7$  Hz, 1H), 7.16 (d,  $J = 1.9$  Hz, 1H), 6.97 (d,  $J = 8.3$  Hz, 1H), 3.94 (s, 3H), 3.93 (s, 3H);  $^{13}\text{C}\{^1\text{H}\}$  NMR (101 MHz,  $\text{CDCl}_3$ )  $\delta$  165.37, 161.56, 150.76,

148.89, 131.07, 130.95, 128.10, 126.25, 121.87, 121.74 (q,  $J = 268.66$  Hz,  $\text{CF}_3$ ), 119.61, 111.73, 110.98, 104.99, 55.92;  $^{19}\text{F}$  NMR (377 MHz,  $\text{CDCl}_3$ )  $\delta$  -54.1. HRMS (ESI),  $m/z$  calcd for  $\text{C}_{16}\text{H}_{13}\text{F}_3\text{NO}_3\text{S}$   $[\text{M} + \text{H}]^+$ : 356.0568; found: 356.0556.

**(E)-3-(Thiophen-2-yl)-5-(2-(thiophen-2-yl)vinyl)-4-(trifluoromethyl)isoxazole (4):** Light yellow solid (0.081 g, 50%); eluent 2%

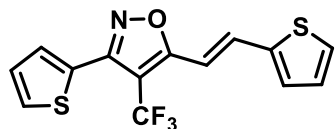

EtOAc/hexane; mp = 120 - 124 °C;  $^1\text{H}$  NMR (400 MHz,  $\text{CDCl}_3$ )  $\delta$  7.73 (d,  $J = 16.0$  Hz, 1H), 7.58 – 7.54 (m, 1H), 7.49 (dd,  $J = 5.1, 1.1$  Hz, 1H), 7.41 (d,  $J = 5.1$  Hz, 1H), 7.31 (d,  $J = 3.6$  Hz, 1H), 7.16 (dd,  $J = 5.1, 3.7$  Hz, 1H), 7.09 (dd,  $J = 5.0, 3.7$  Hz, 1H), 6.91 (dd,  $J = 16.0, 0.7$  Hz, 1H);  $^{13}\text{C}\{^1\text{H}\}$  NMR (101

MHz,  $\text{CDCl}_3$ )  $\delta$  167.80, 155.52, 140.12, 131.93, 130.58, 129.56, 128.67, 128.39, 128.26, 127.88, 127.31, 121.92 (q,  $J = 268.66$  Hz,  $\text{CF}_3$ ), 117.94, 109.38, 104.47 (q,  $J = 37.37$  Hz, C- $\text{CF}_3$ );  $^{19}\text{F}$  NMR (377 MHz,  $\text{CDCl}_3$ )  $\delta$  -55.06. HRMS (ESI),  $m/z$  calcd for  $\text{C}_{14}\text{H}_9\text{F}_3\text{NOS}_2$   $[\text{M} + \text{H}]^+$ : 328.0078; found: 328.0068.

**3-(Thiophen-2-yl)-5-(4-(thiophen-2-yl)-1H-pyrrol-3-yl)-4-(trifluoromethyl)isoxazole (5):** Brown solid (0.107 g, 98%);  $^1\text{H}$  NMR

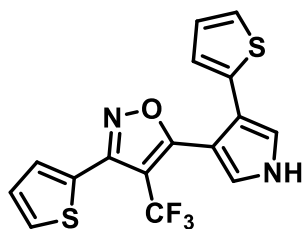

(400 MHz,  $\text{CDCl}_3$ )  $\delta$  8.92 (s, 1H), 7.58 – 7.55 (m, 1H), 7.49 (dd,  $J = 5.1, 1.0$  Hz, 1H), 7.18 – 7.15 (m, 2H), 7.14 (d,  $J = 2.5$  Hz, 1H), 7.02 (t,  $J = 2.3$  Hz, 1H), 6.97 (dd,  $J = 5.1, 3.6$  Hz, 1H), 6.90 (dd,  $J = 3.5, 1.1$  Hz, 1H);  $^{13}\text{C}\{^1\text{H}\}$  NMR (101 MHz,  $\text{CDCl}_3$ )  $\delta$  168.05, 155.39, 135.53, 129.60, 128.49, 127.85, 127.70, 127.47, 125.53, 124.49, 123.83, 121.92, 121.55 (q,  $J = 268.6$  Hz,  $\text{CF}_3$ ), 118.65, 117.86, 107.19, 106.21 (q,  $J = 38.38$  Hz, C- $\text{CF}_3$ );  $^{19}\text{F}$  NMR (377 MHz,  $\text{CDCl}_3$ )  $\delta$  -55.66. HRMS (ESI),  $m/z$  calcd for

$\text{C}_{16}\text{H}_{10}\text{F}_3\text{N}_2\text{OS}_2$   $[\text{M} + \text{H}]^+$ : 367.0187; found: 367.0180.

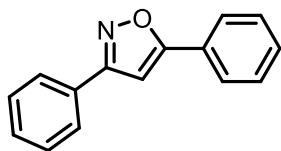

**3,5-diphenylisoxazole (7)** [1]

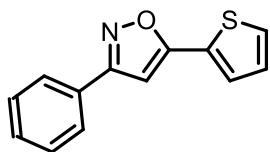

**3-phenyl-5-(thiophen-2-yl)isoxazole (9)**[1]

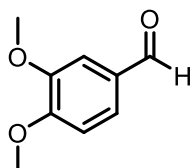

**3,4-dimethoxybenzaldehyde (11):**  $^1\text{H NMR}$  (400 MHz,  $\text{CDCl}_3$ )  $\delta$  9.81 (s, 1H), 7.46 – 7.34 (m, 2H), 6.94 (d,  $J = 8.2$  Hz, 1H), 3.91 (d,  $J = 10.5$  Hz, 6H).  $^{13}\text{C NMR}$  (101 MHz,  $\text{CDCl}_3$ )  $\delta$  190.95, 154.49, 149.60, 130.10, 126.88, 110.40, 108.94, 56.16, 55.98.

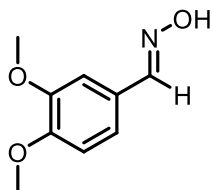

**(E)-3,4-dimethoxybenzaldehyde oxime (12):**  $^1\text{H NMR}$  (400 MHz,  $\text{CDCl}_3$ )  $\delta$  8.08 (s, 1H), 7.26 (s, 1H), 7.20 (d,  $J = 1.9$  Hz, 1H), 7.02 (dd,  $J = 8.3, 1.9$  Hz, 1H), 6.85 (d,  $J = 8.3$  Hz, 1H), 3.90 (s, 7H).  $^{13}\text{C NMR}$  (101 MHz,  $\text{CDCl}_3$ )  $\delta$  150.83, 150.14, 149.32, 124.84, 121.68, 110.80, 108.04, 55.93, 55.89.

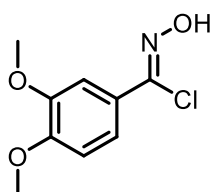

**(Z)-N-hydroxy-3,4-dimethoxybenzimidoyl chloride (13):**  $^1\text{H NMR}$  (400 MHz,  $\text{CDCl}_3$ )  $\delta$  7.44 (dd,  $J = 8.5, 2.1$  Hz, 1H), 7.36 (d,  $J = 2.1$  Hz, 1H), 6.88 (d,  $J = 8.5$  Hz, 1H), 3.92 (s, 6H).  $^{13}\text{C NMR}$  (101 MHz,  $\text{CDCl}_3$ )  $\delta$  151.27, 148.76, 139.75, 125.06, 120.90, 110.53, 109.50, 55.99.

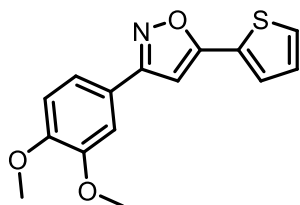

**3-(3,4-dimethoxyphenyl)-5-(thiophen-2-yl)isoxazole (14):**  $^1\text{H NMR}$  (400 MHz,  $\text{CDCl}_3$ )  $\delta$  7.56 (dd,  $J = 3.7, 1.1$  Hz, 1H), 7.49 – 7.42 (m, 2H), 7.34 (dd,  $J = 8.3, 2.0$  Hz, 1H), 7.14 (dd,  $J = 5.0, 3.7$  Hz, 1H), 6.94 (d,  $J = 8.3$  Hz, 1H), 6.65 (s, 1H), 3.95 (d,  $J = 12.7$  Hz, 6H).  $^{13}\text{C NMR}$  (101 MHz,  $\text{CDCl}_3$ )  $\delta$  165.21, 162.68, 150.70, 149.33, 129.35, 128.10, 127.95, 127.02, 121.60, 119.97, 111.08, 109.37, 97.15, 56.05, 55.98. HRMS (ESI),

$m/z$  calcd for  $\text{C}_{15}\text{H}_{14}\text{NO}_3\text{S}$   $[\text{M} + \text{H}]^+$ : 288.0694; found: 288.0815.

**2.  $^1\text{H}$  and  $^{13}\text{C}$  Spectra of all synthesized compounds.**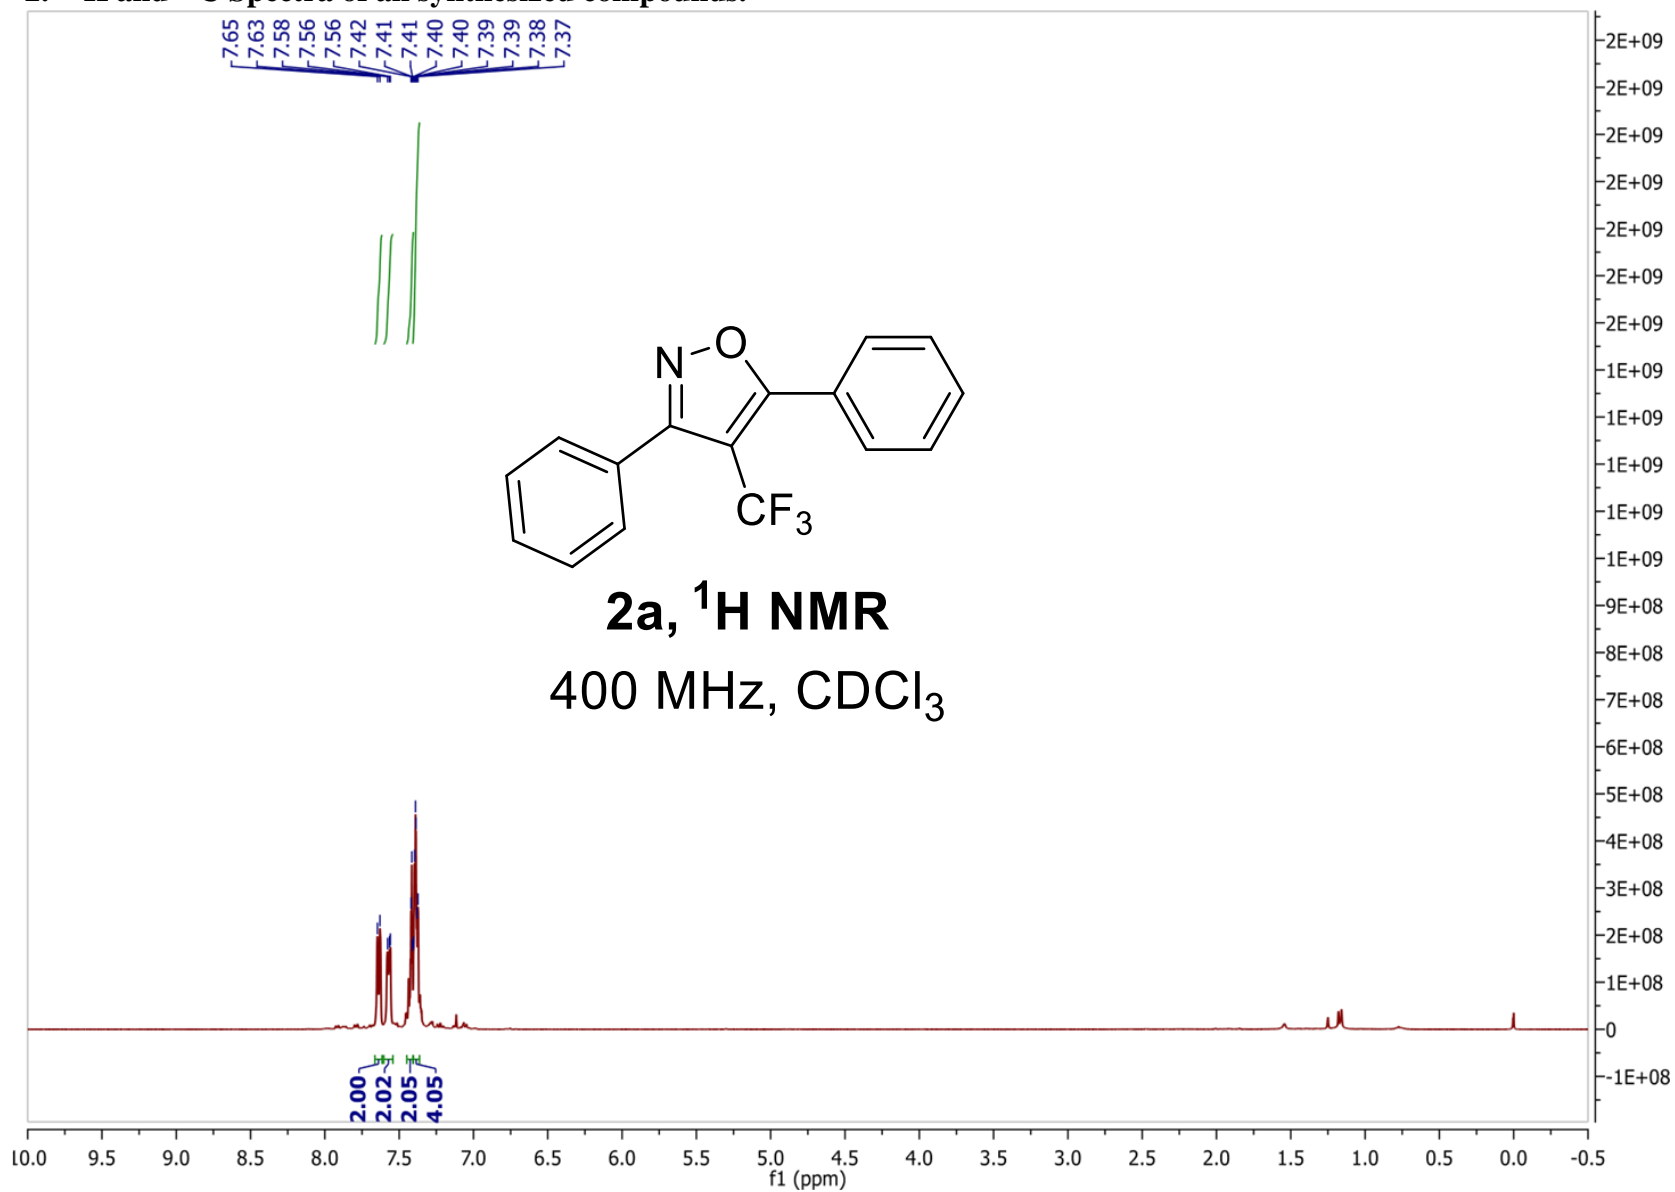

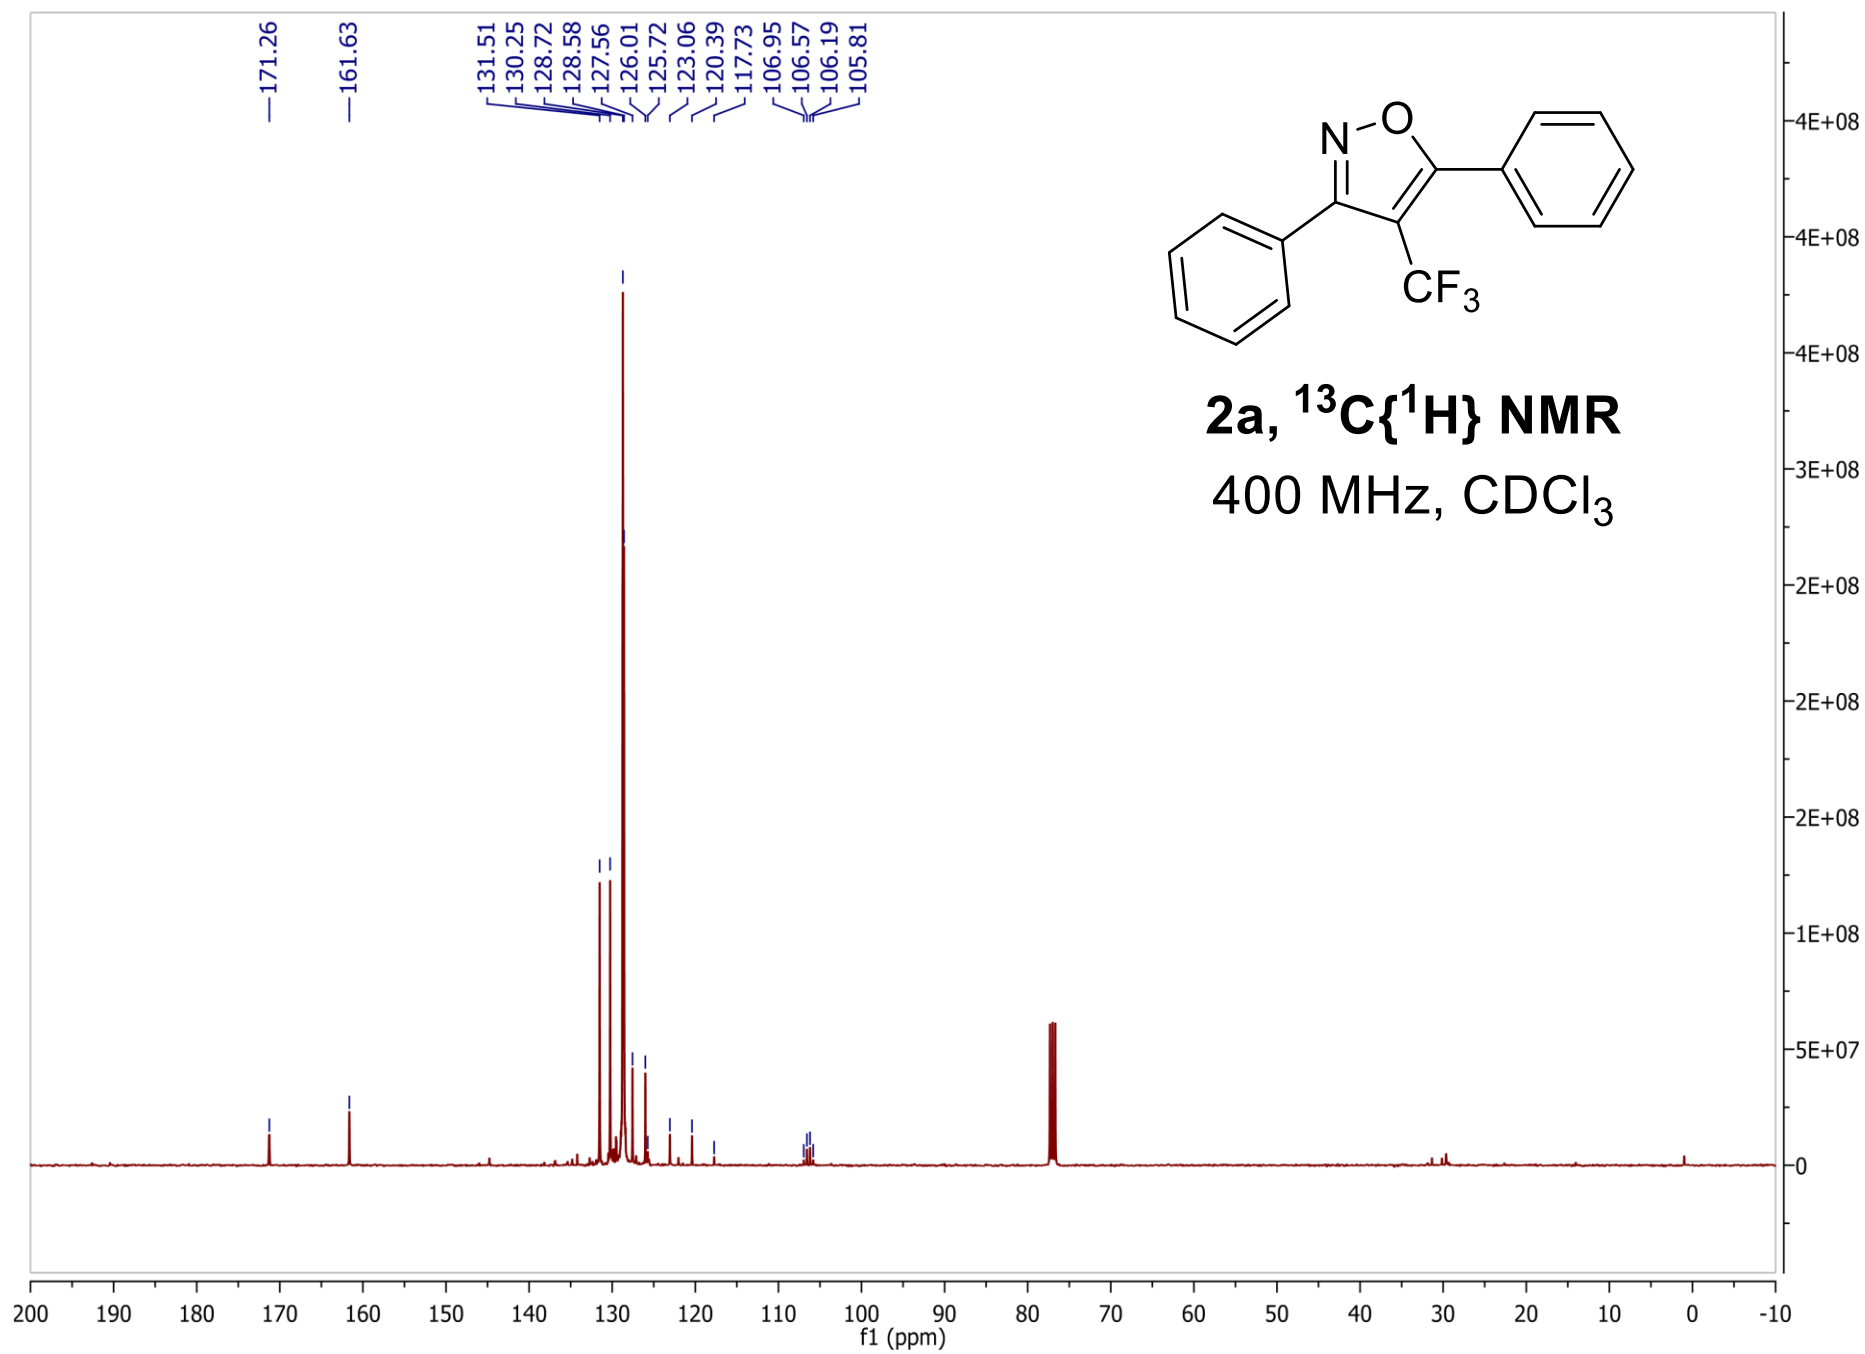

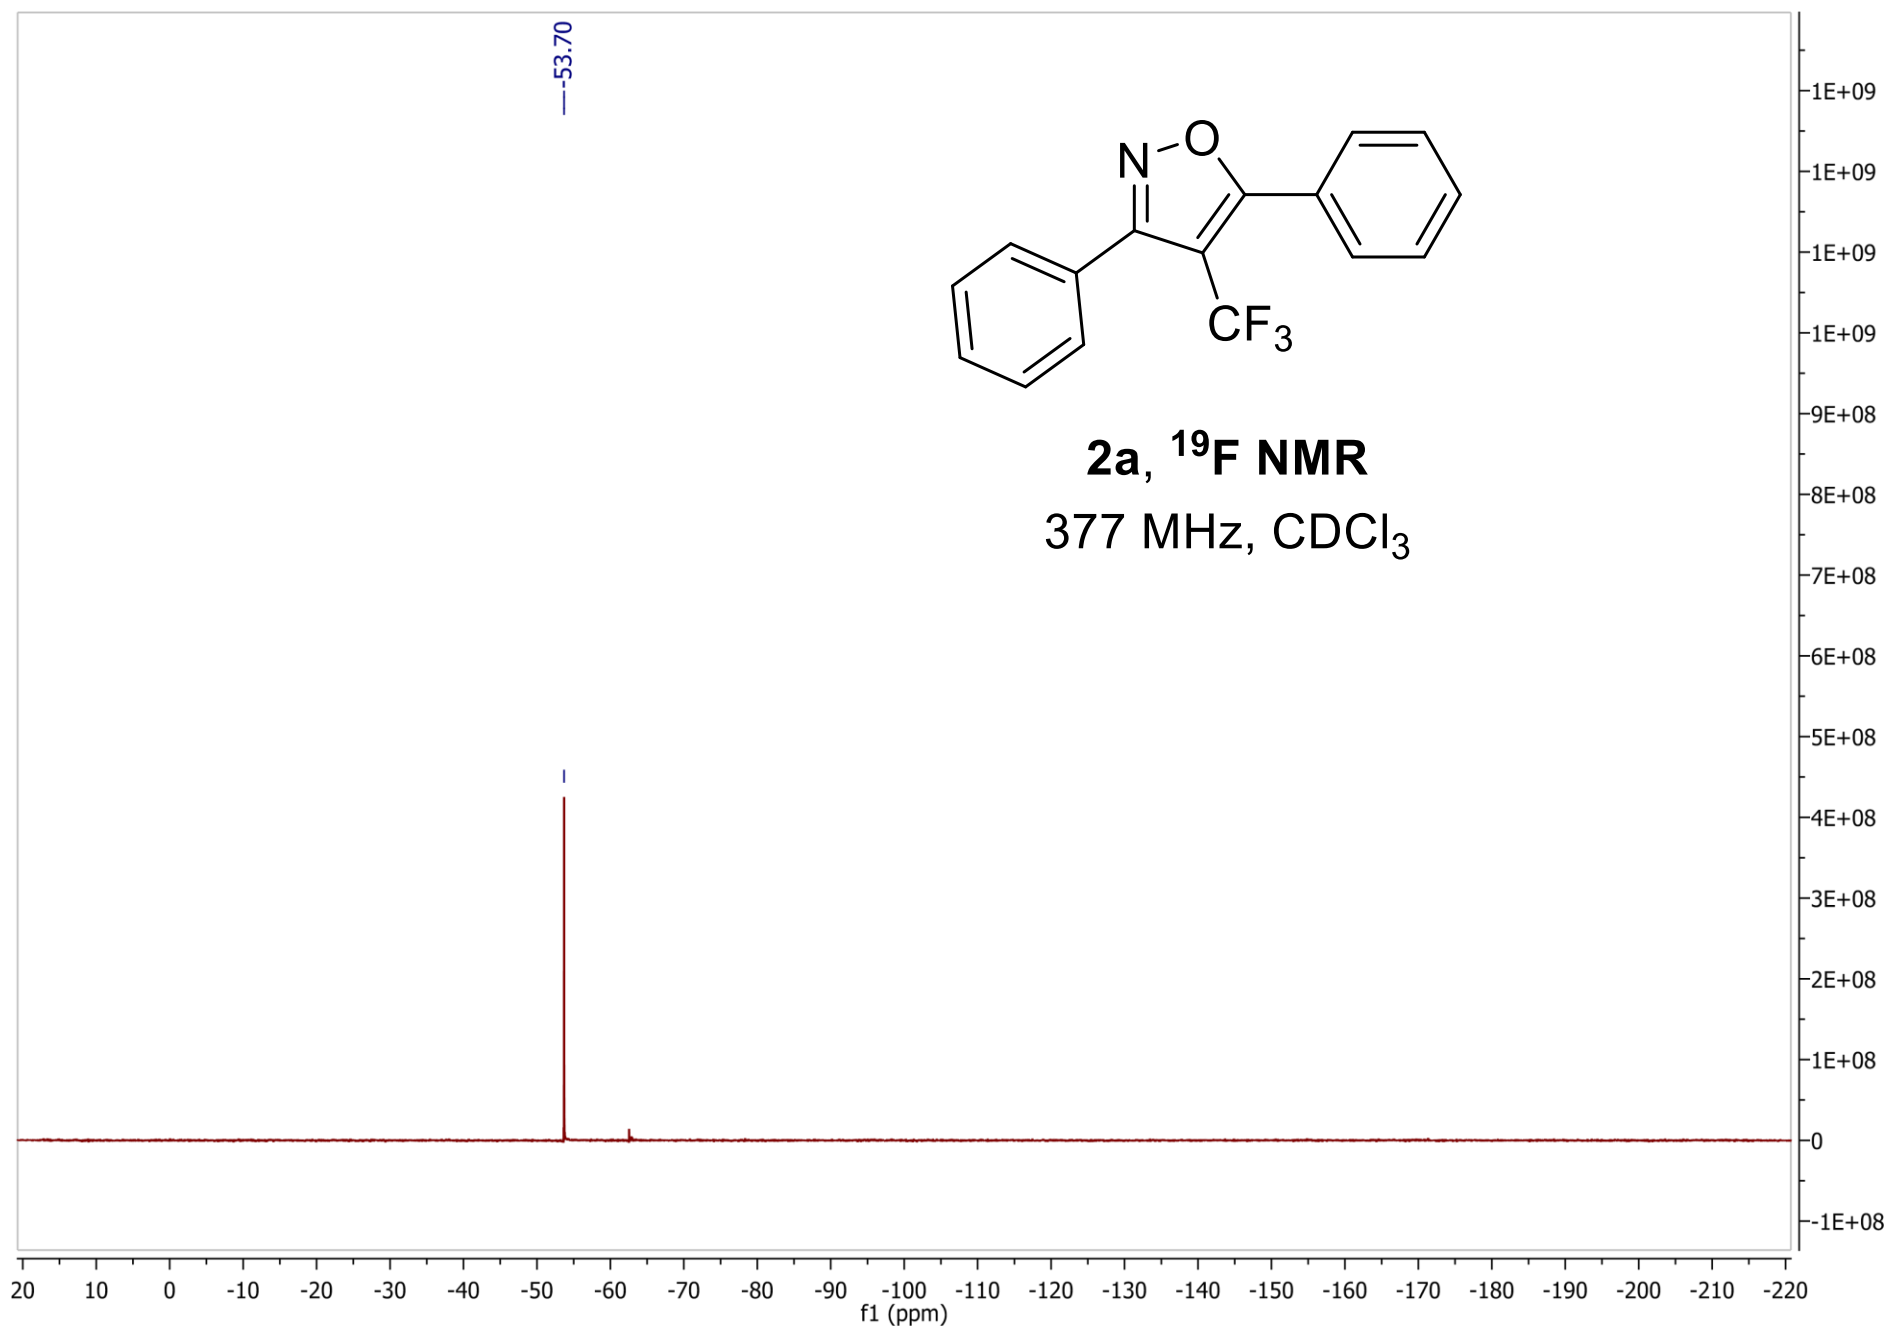



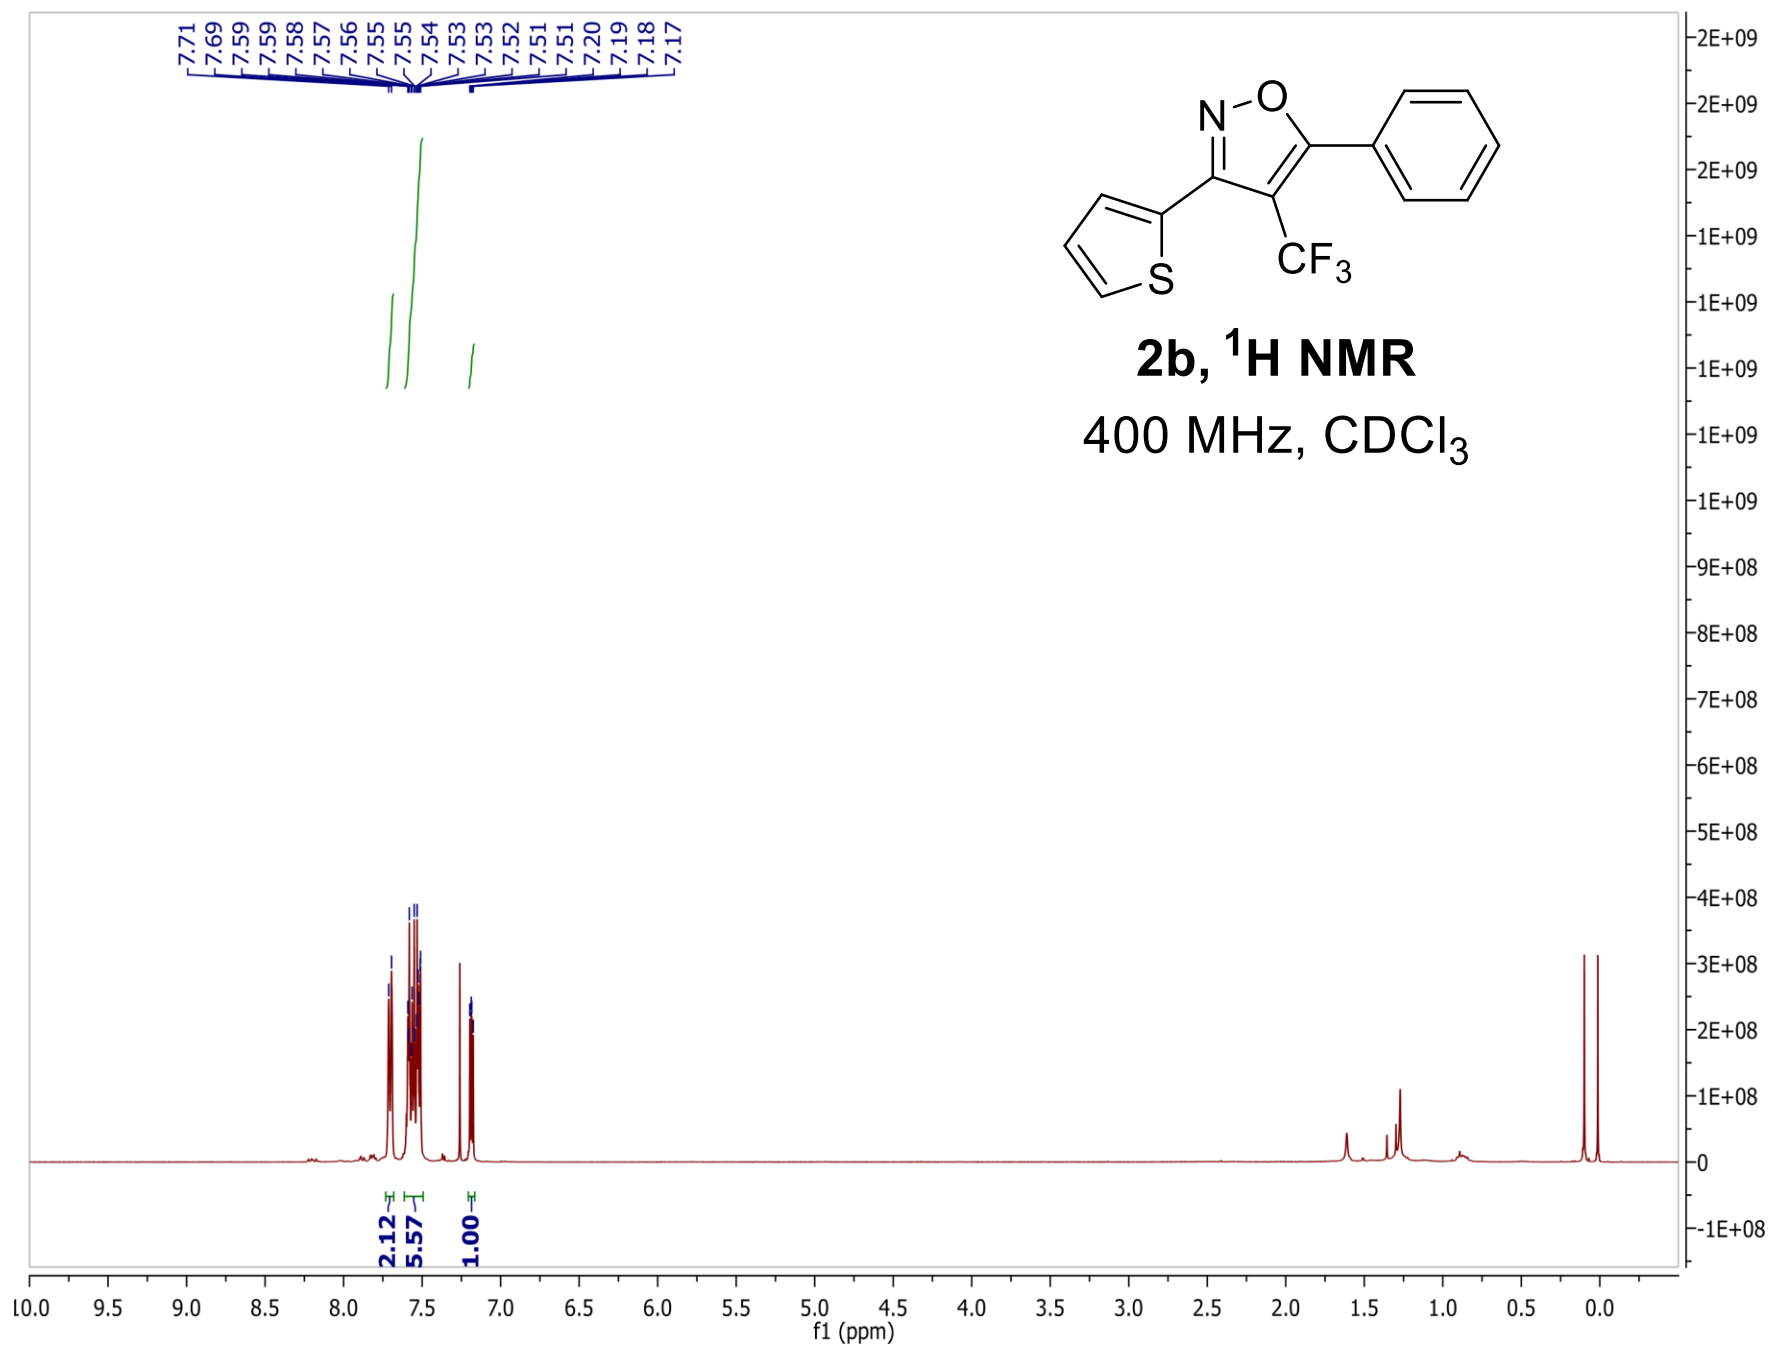

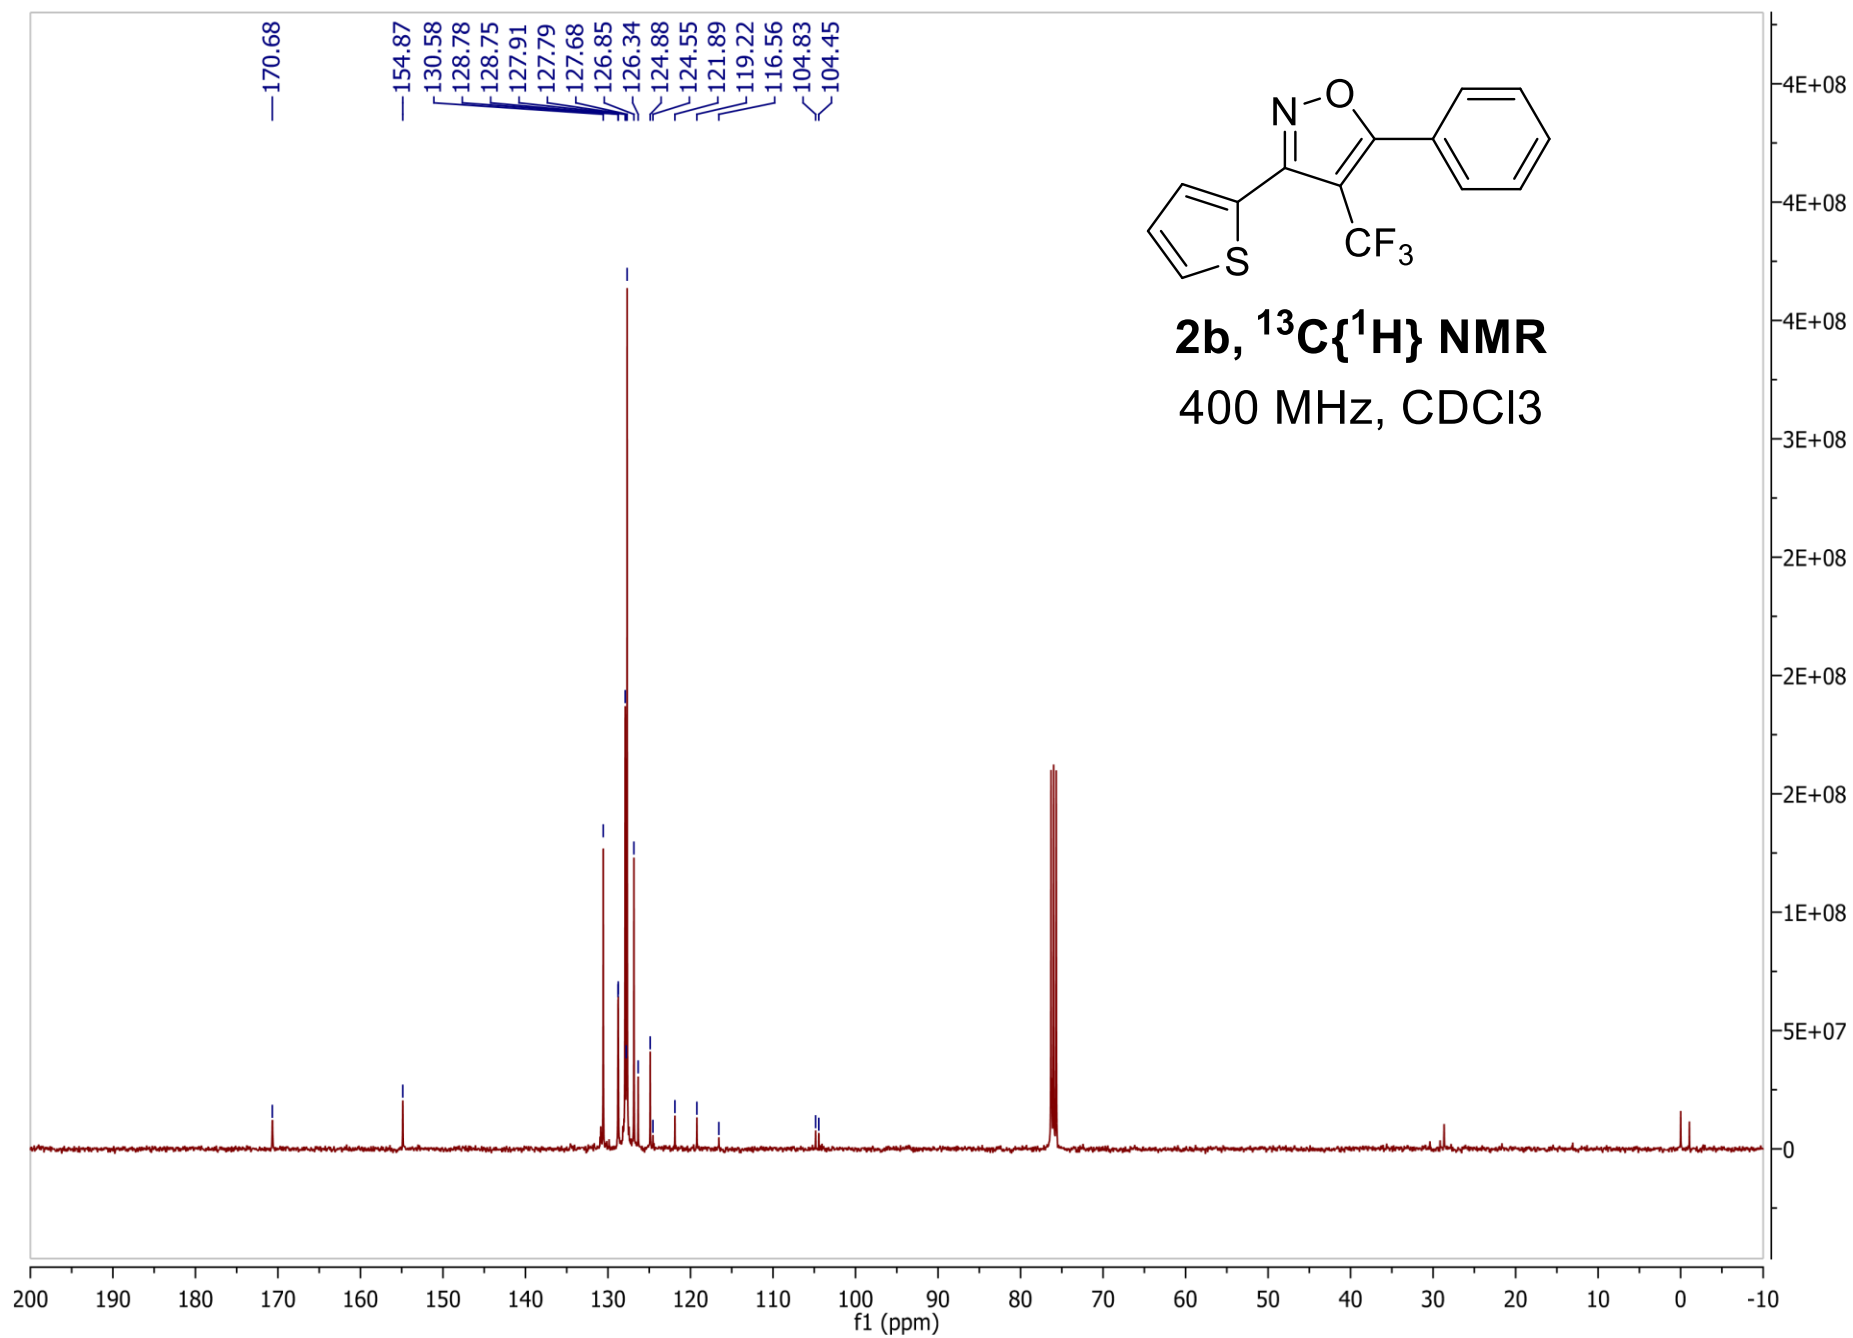

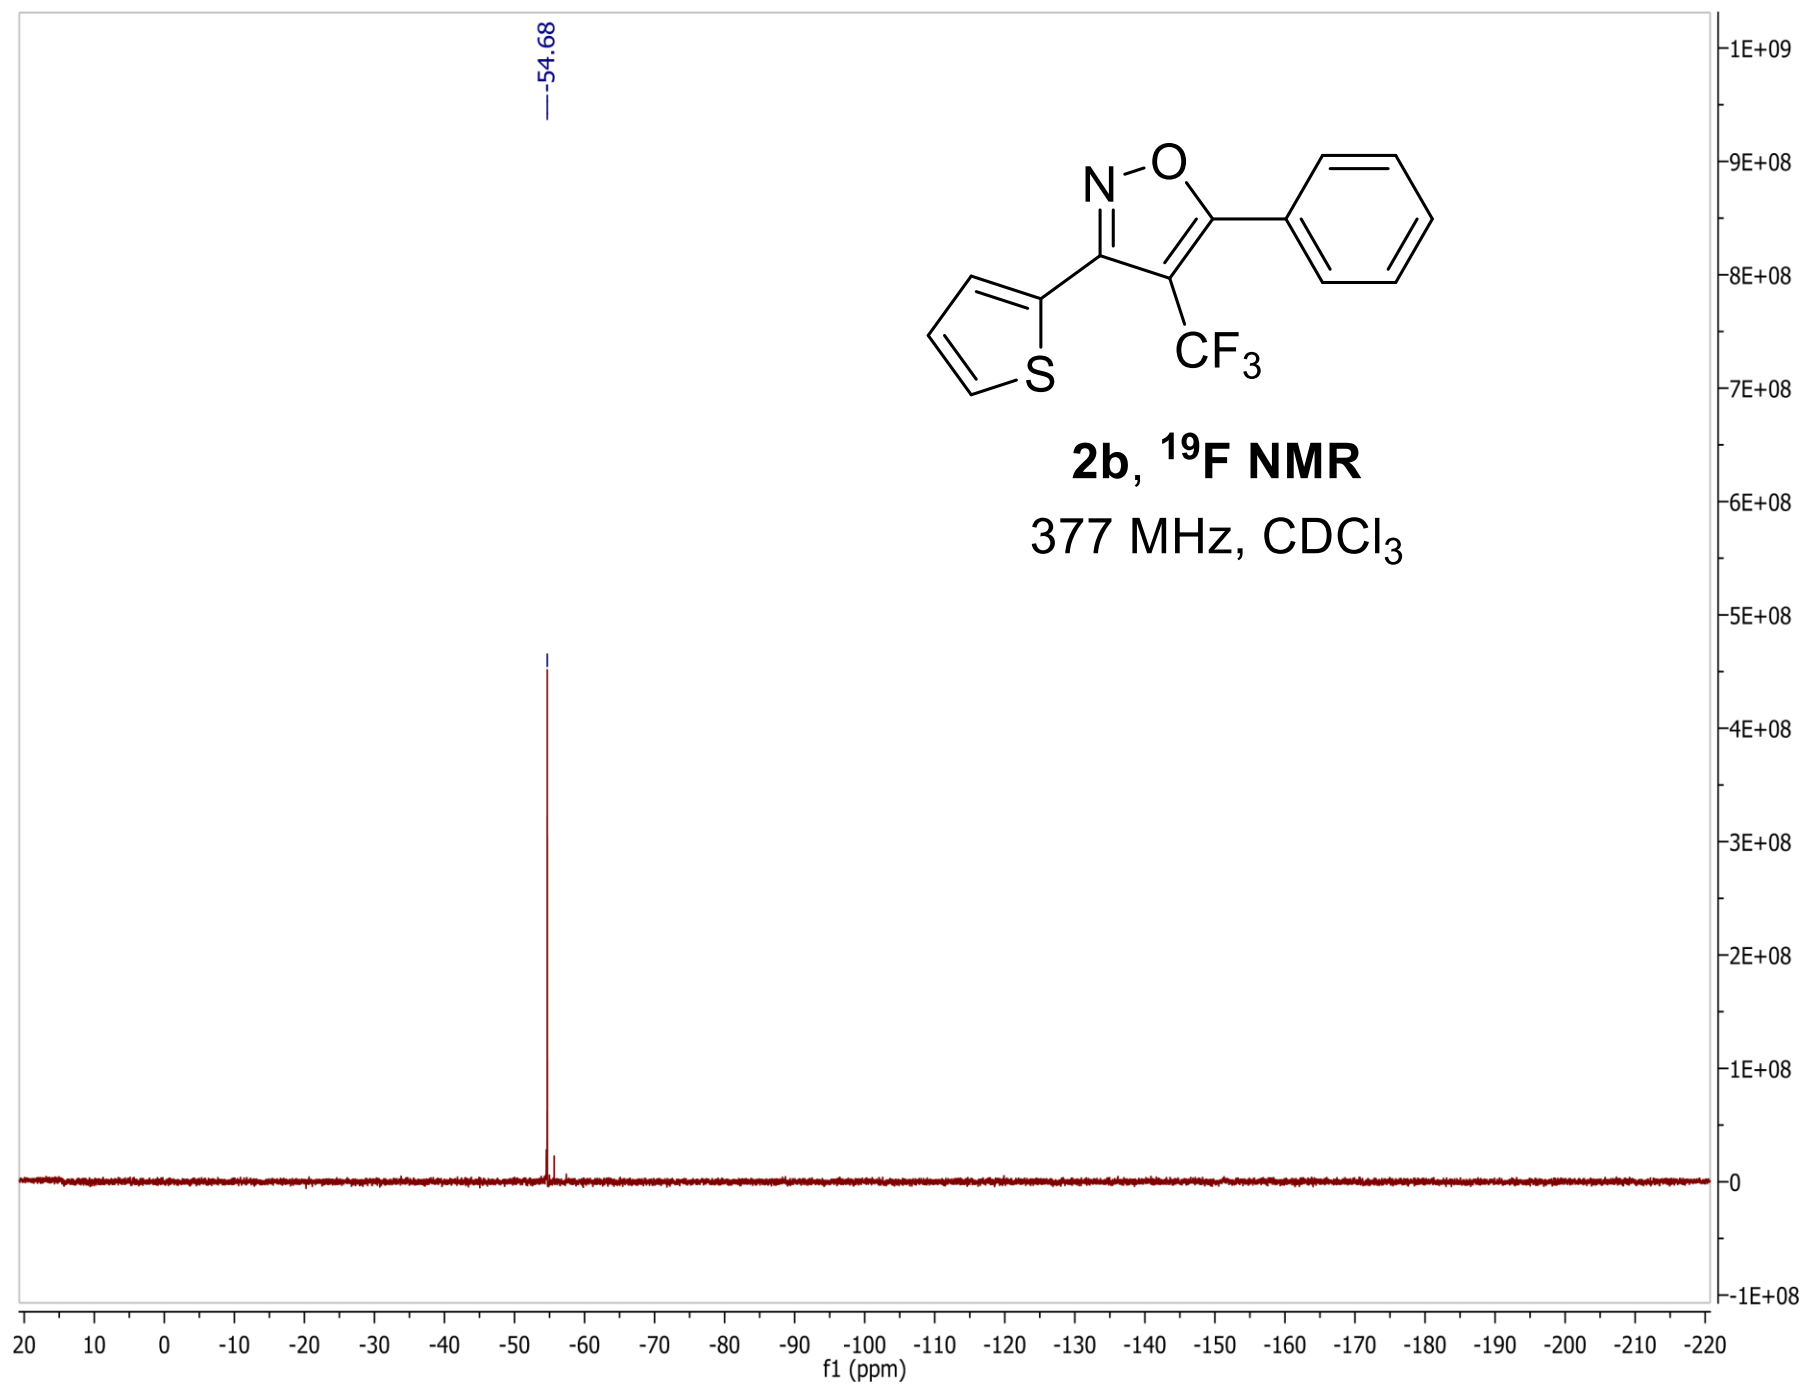

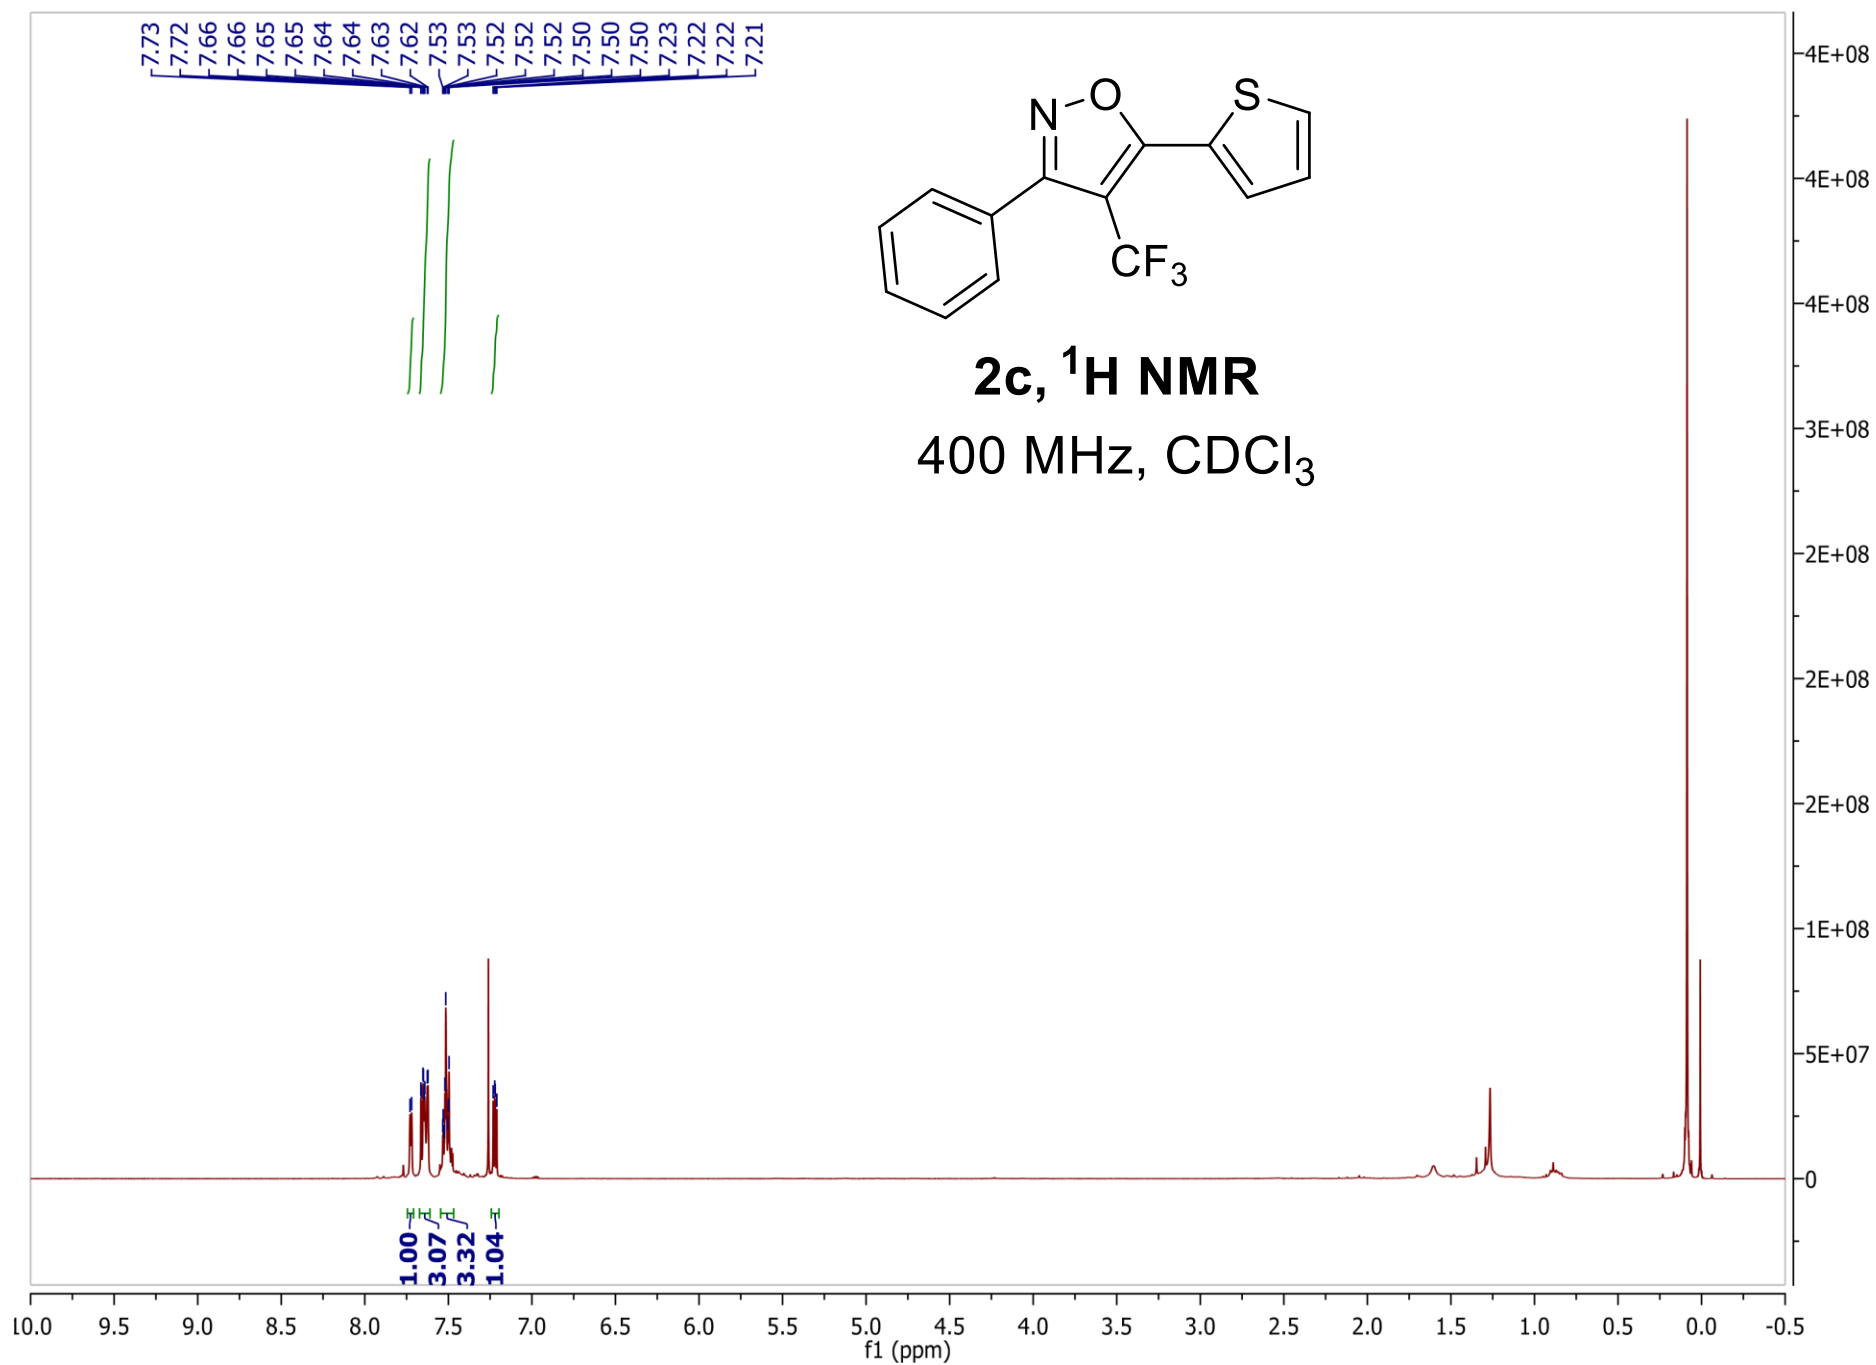

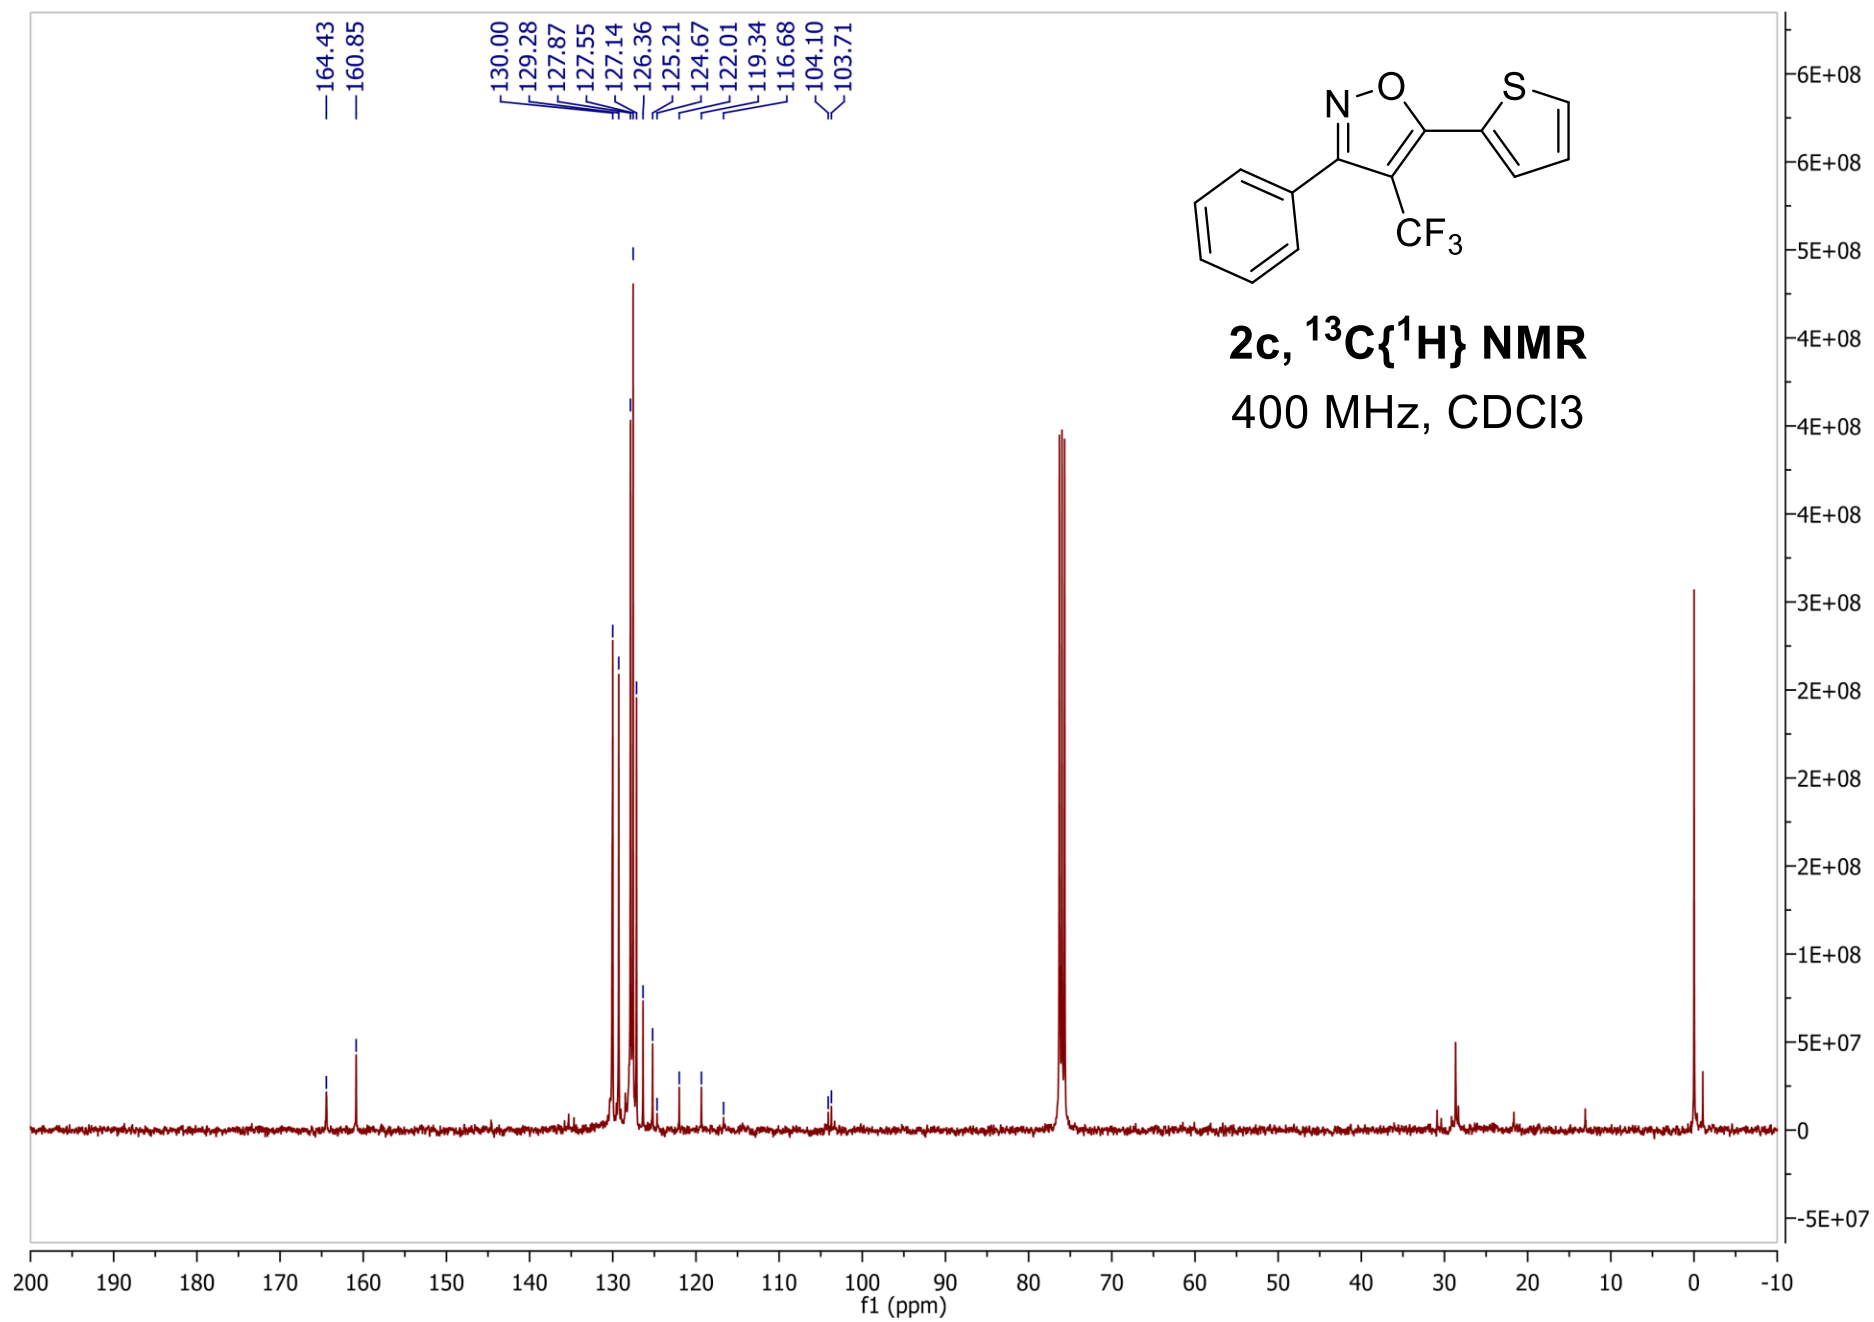

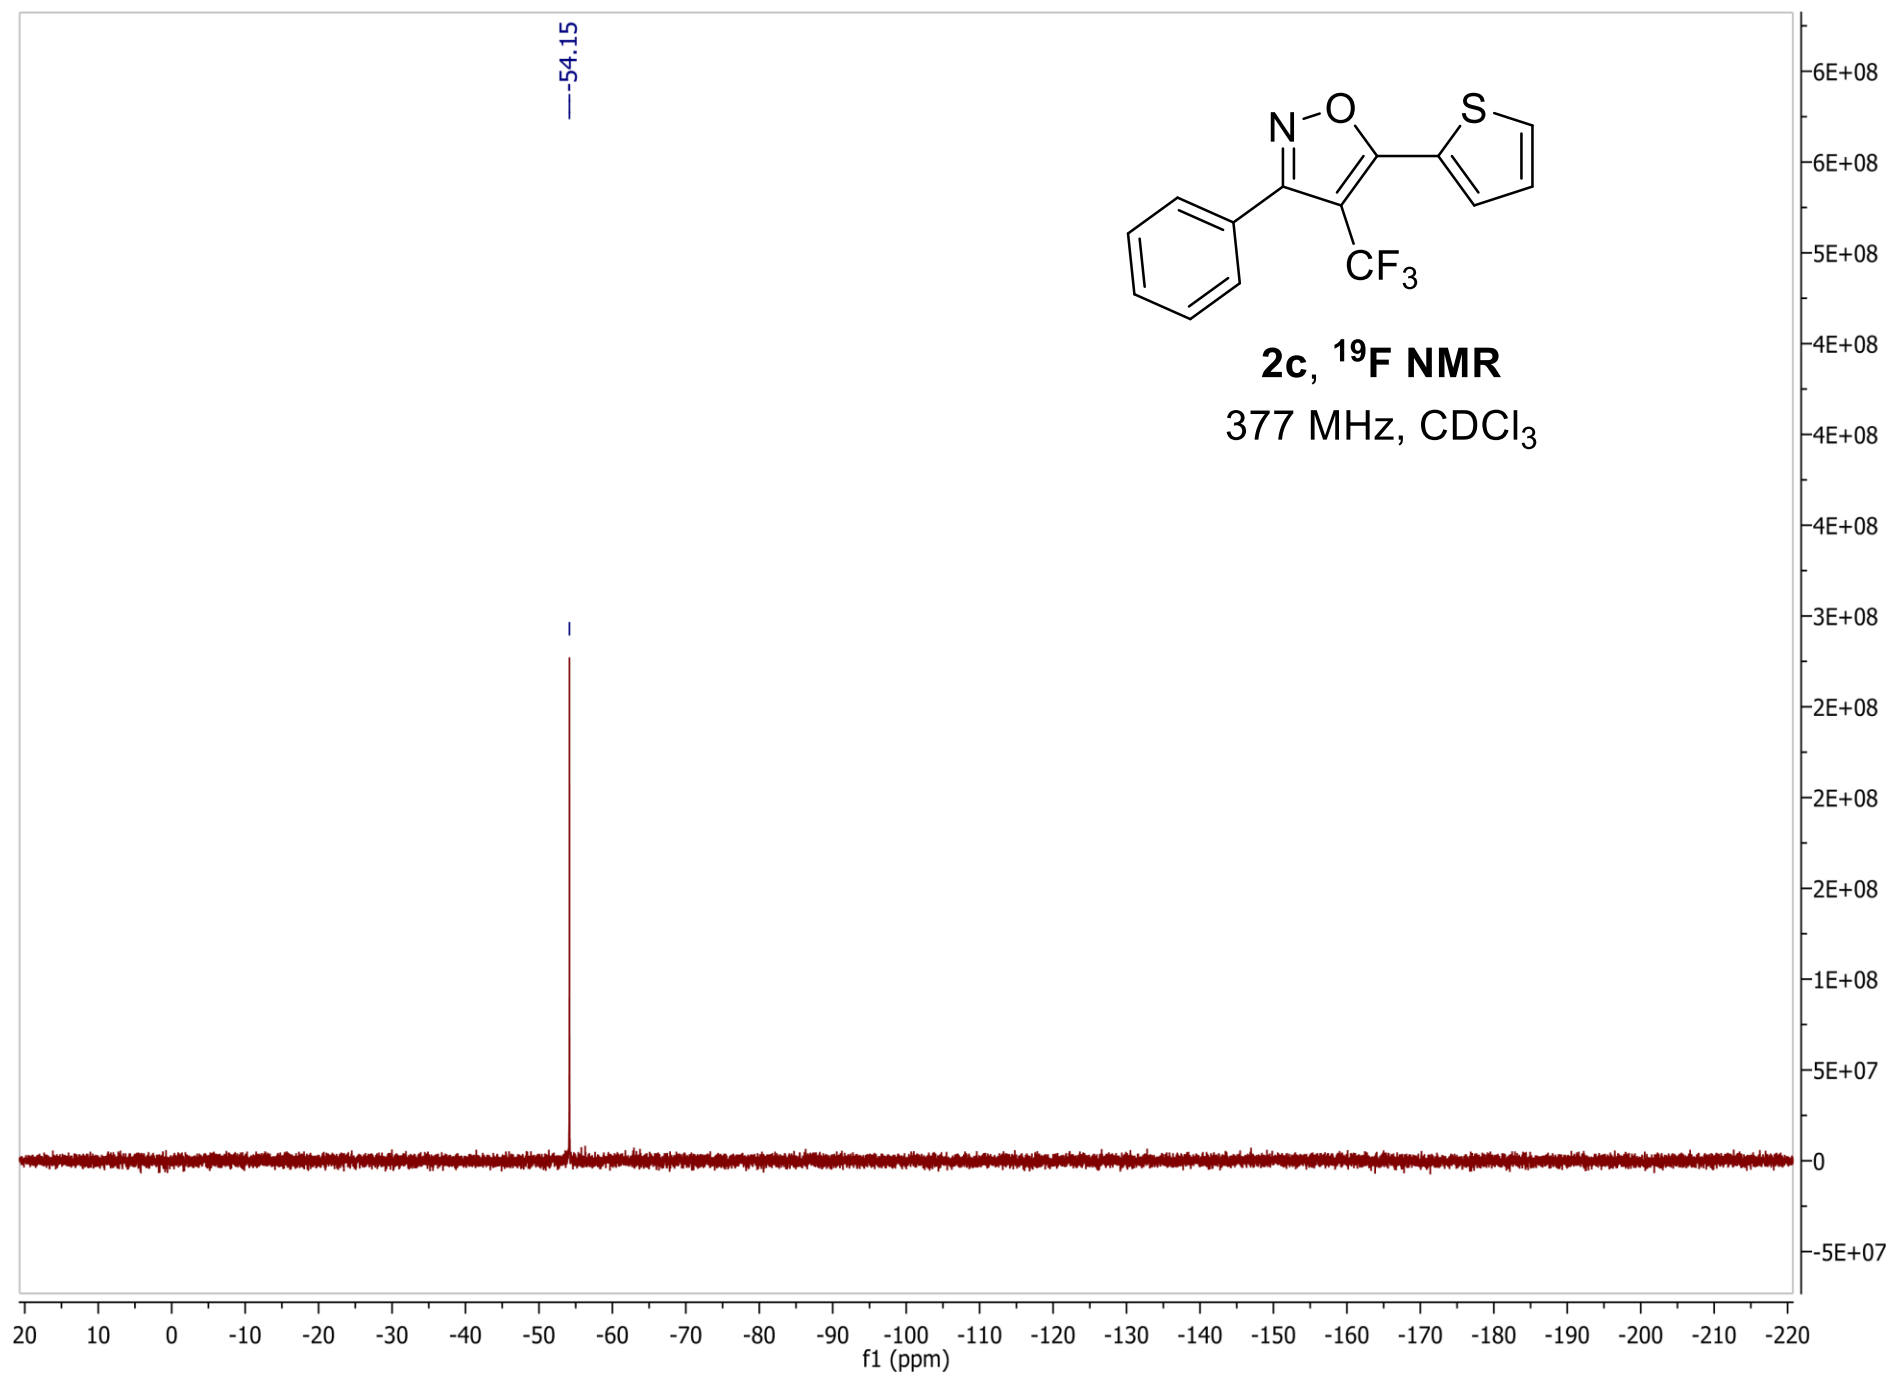

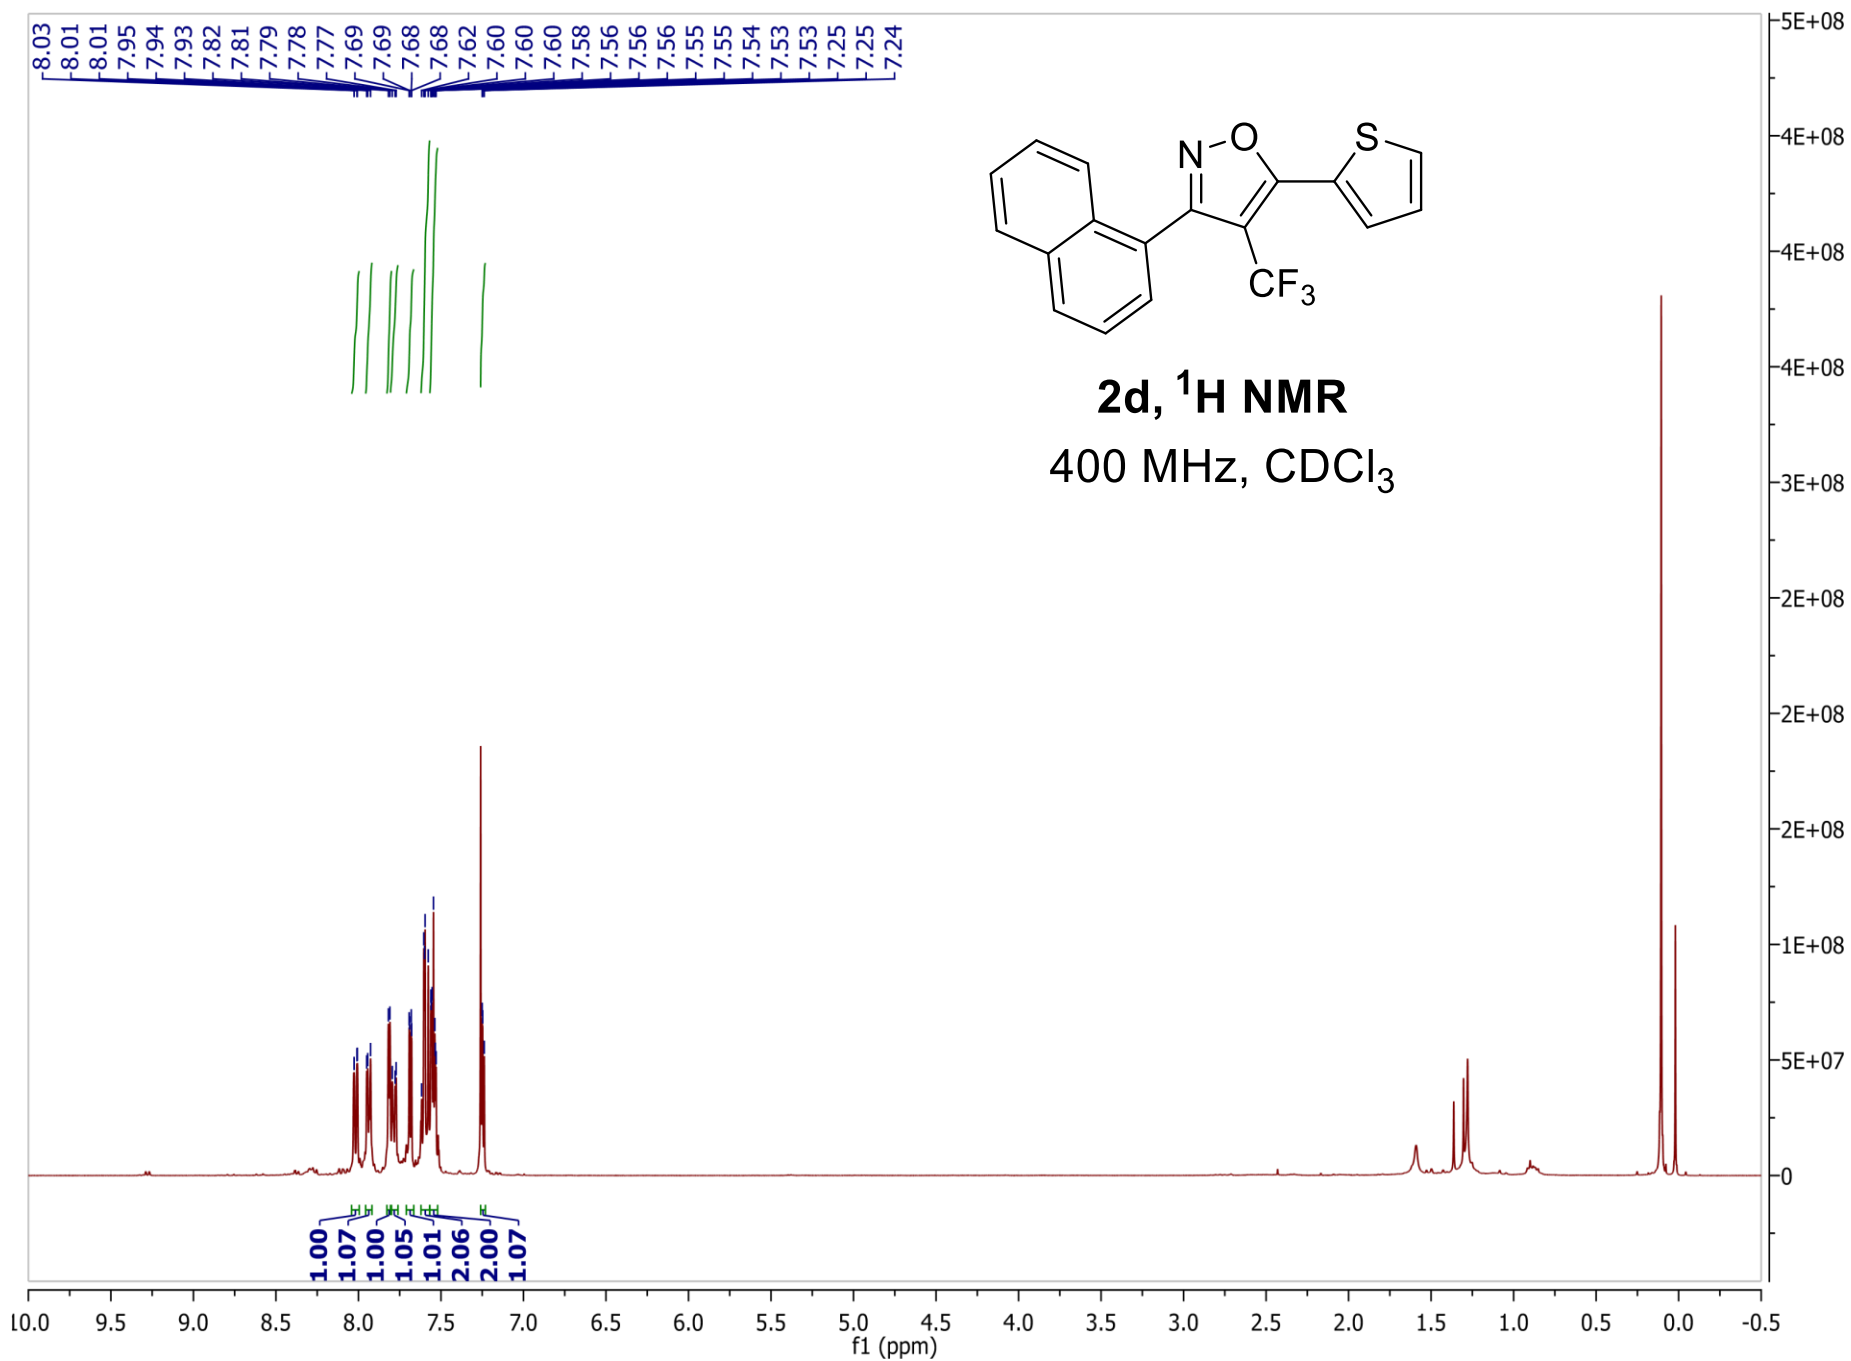

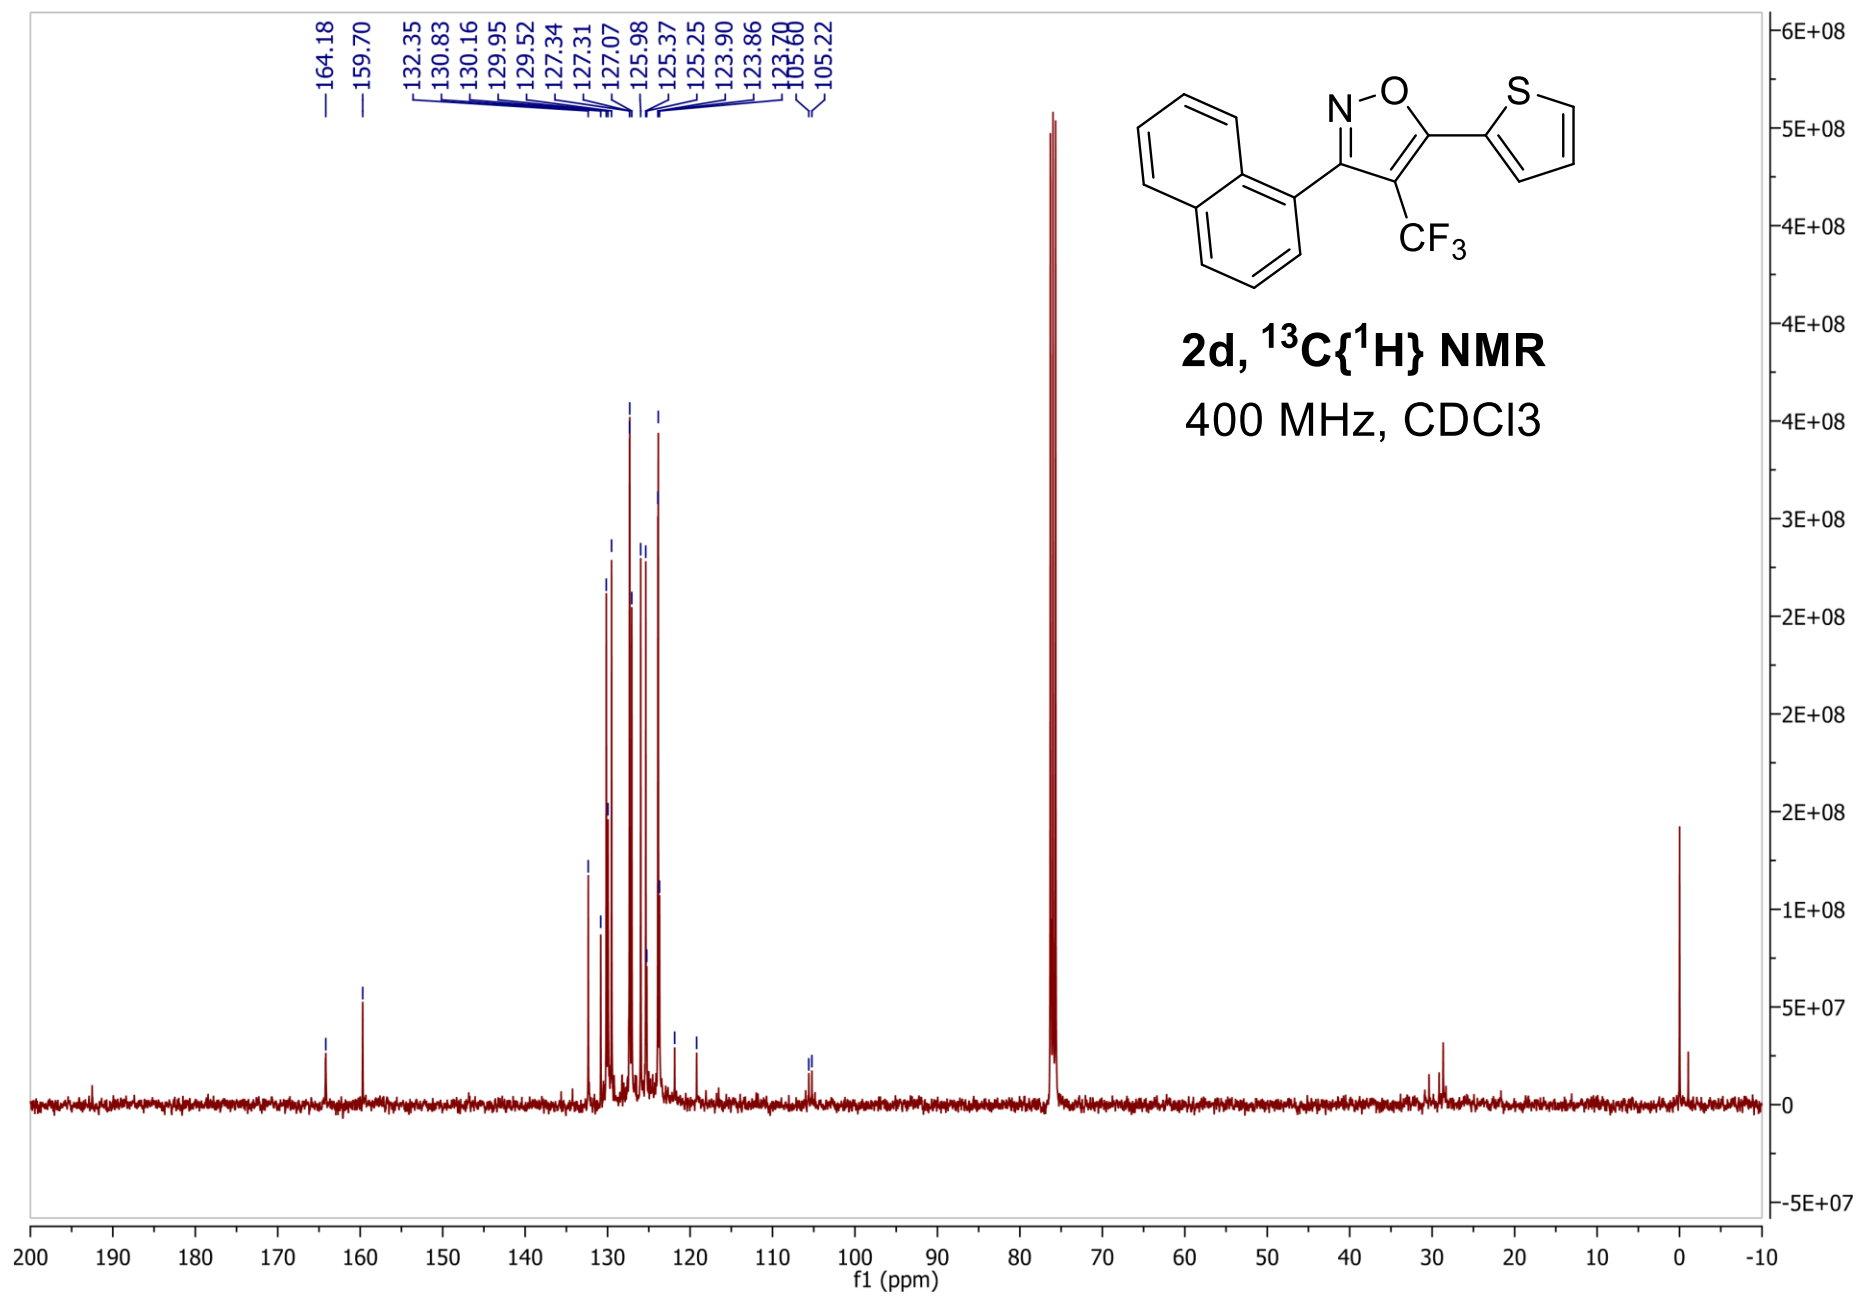



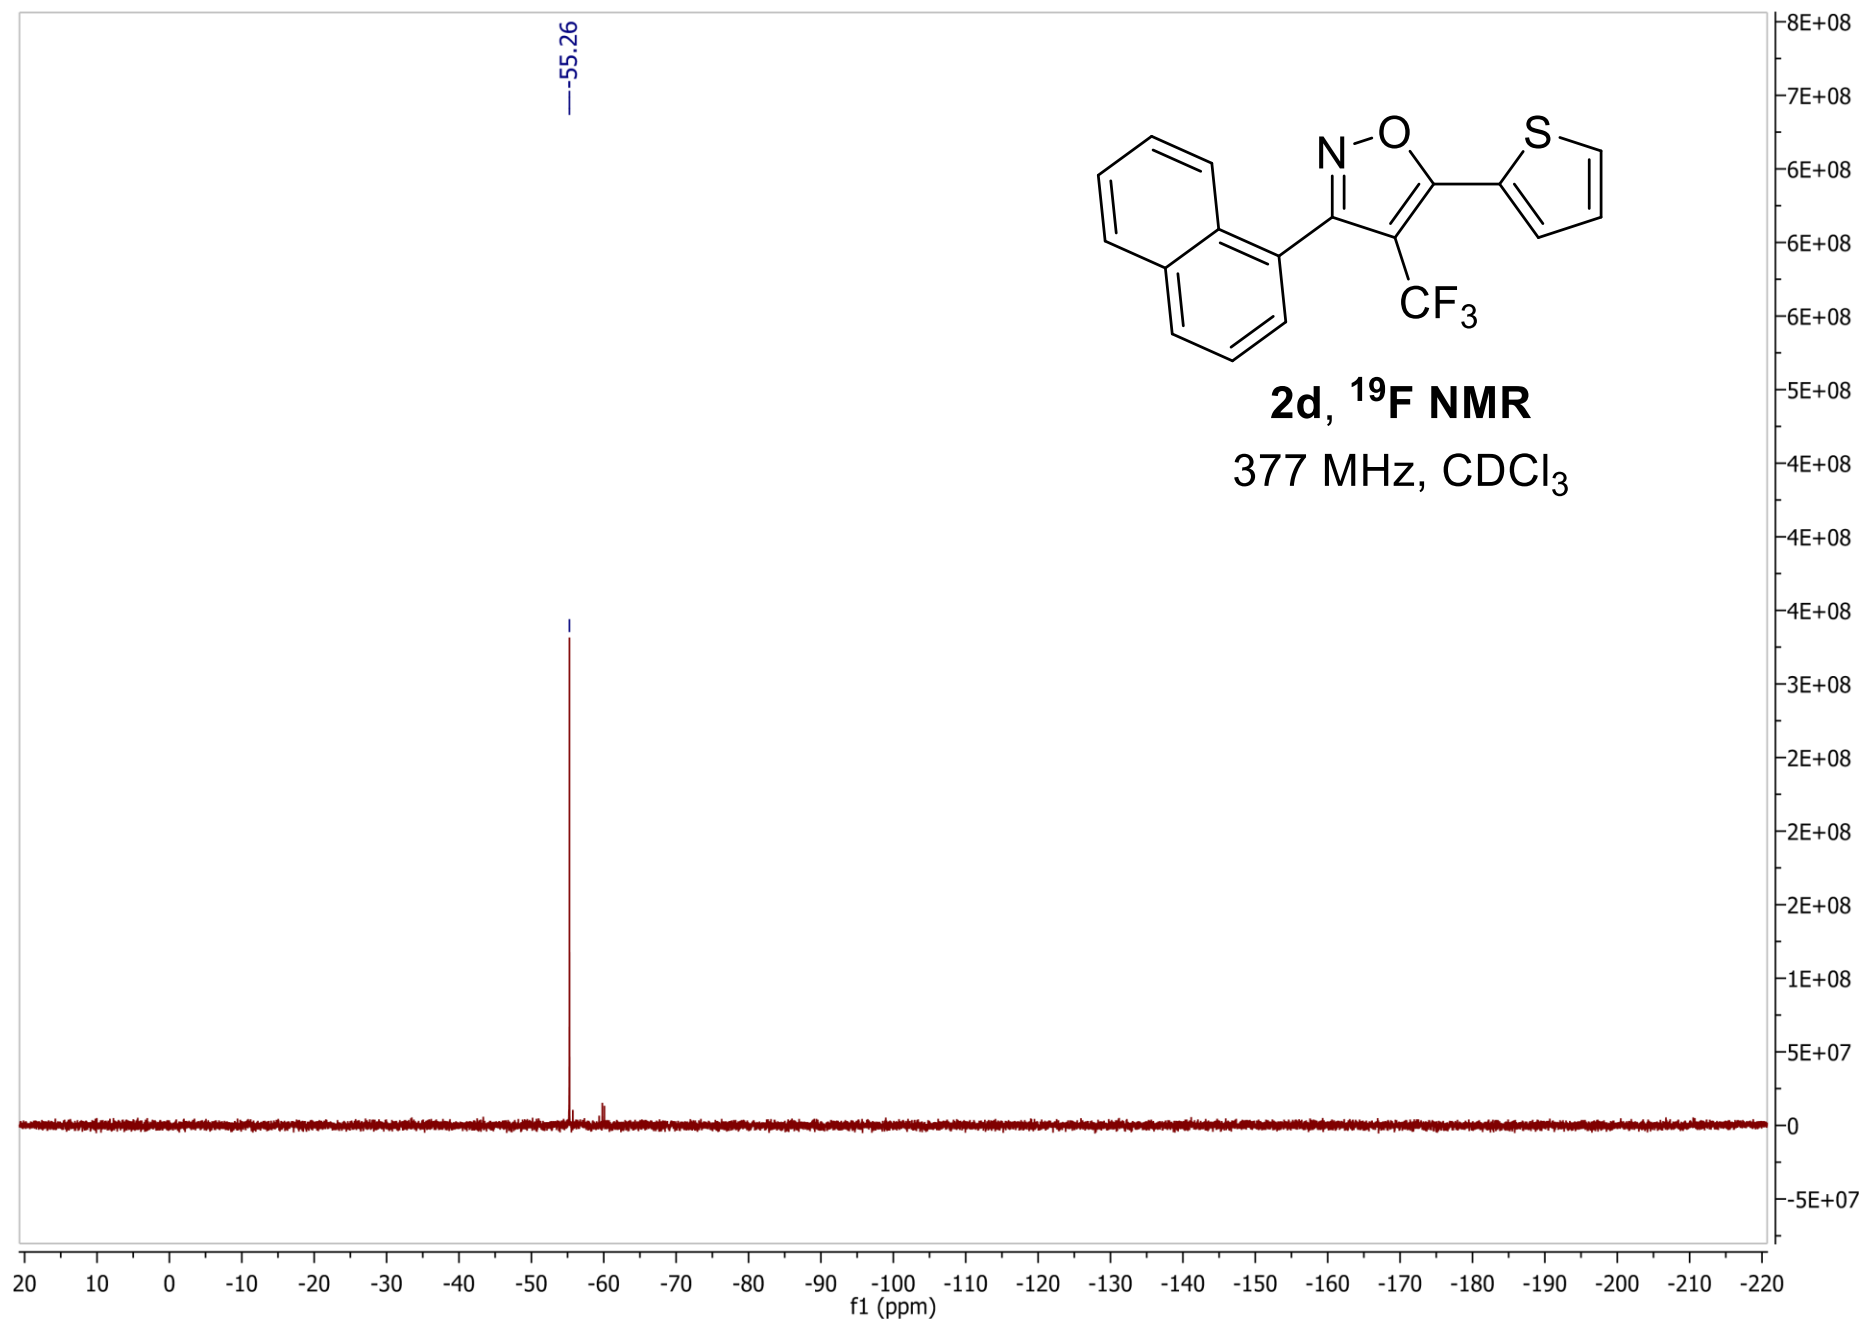

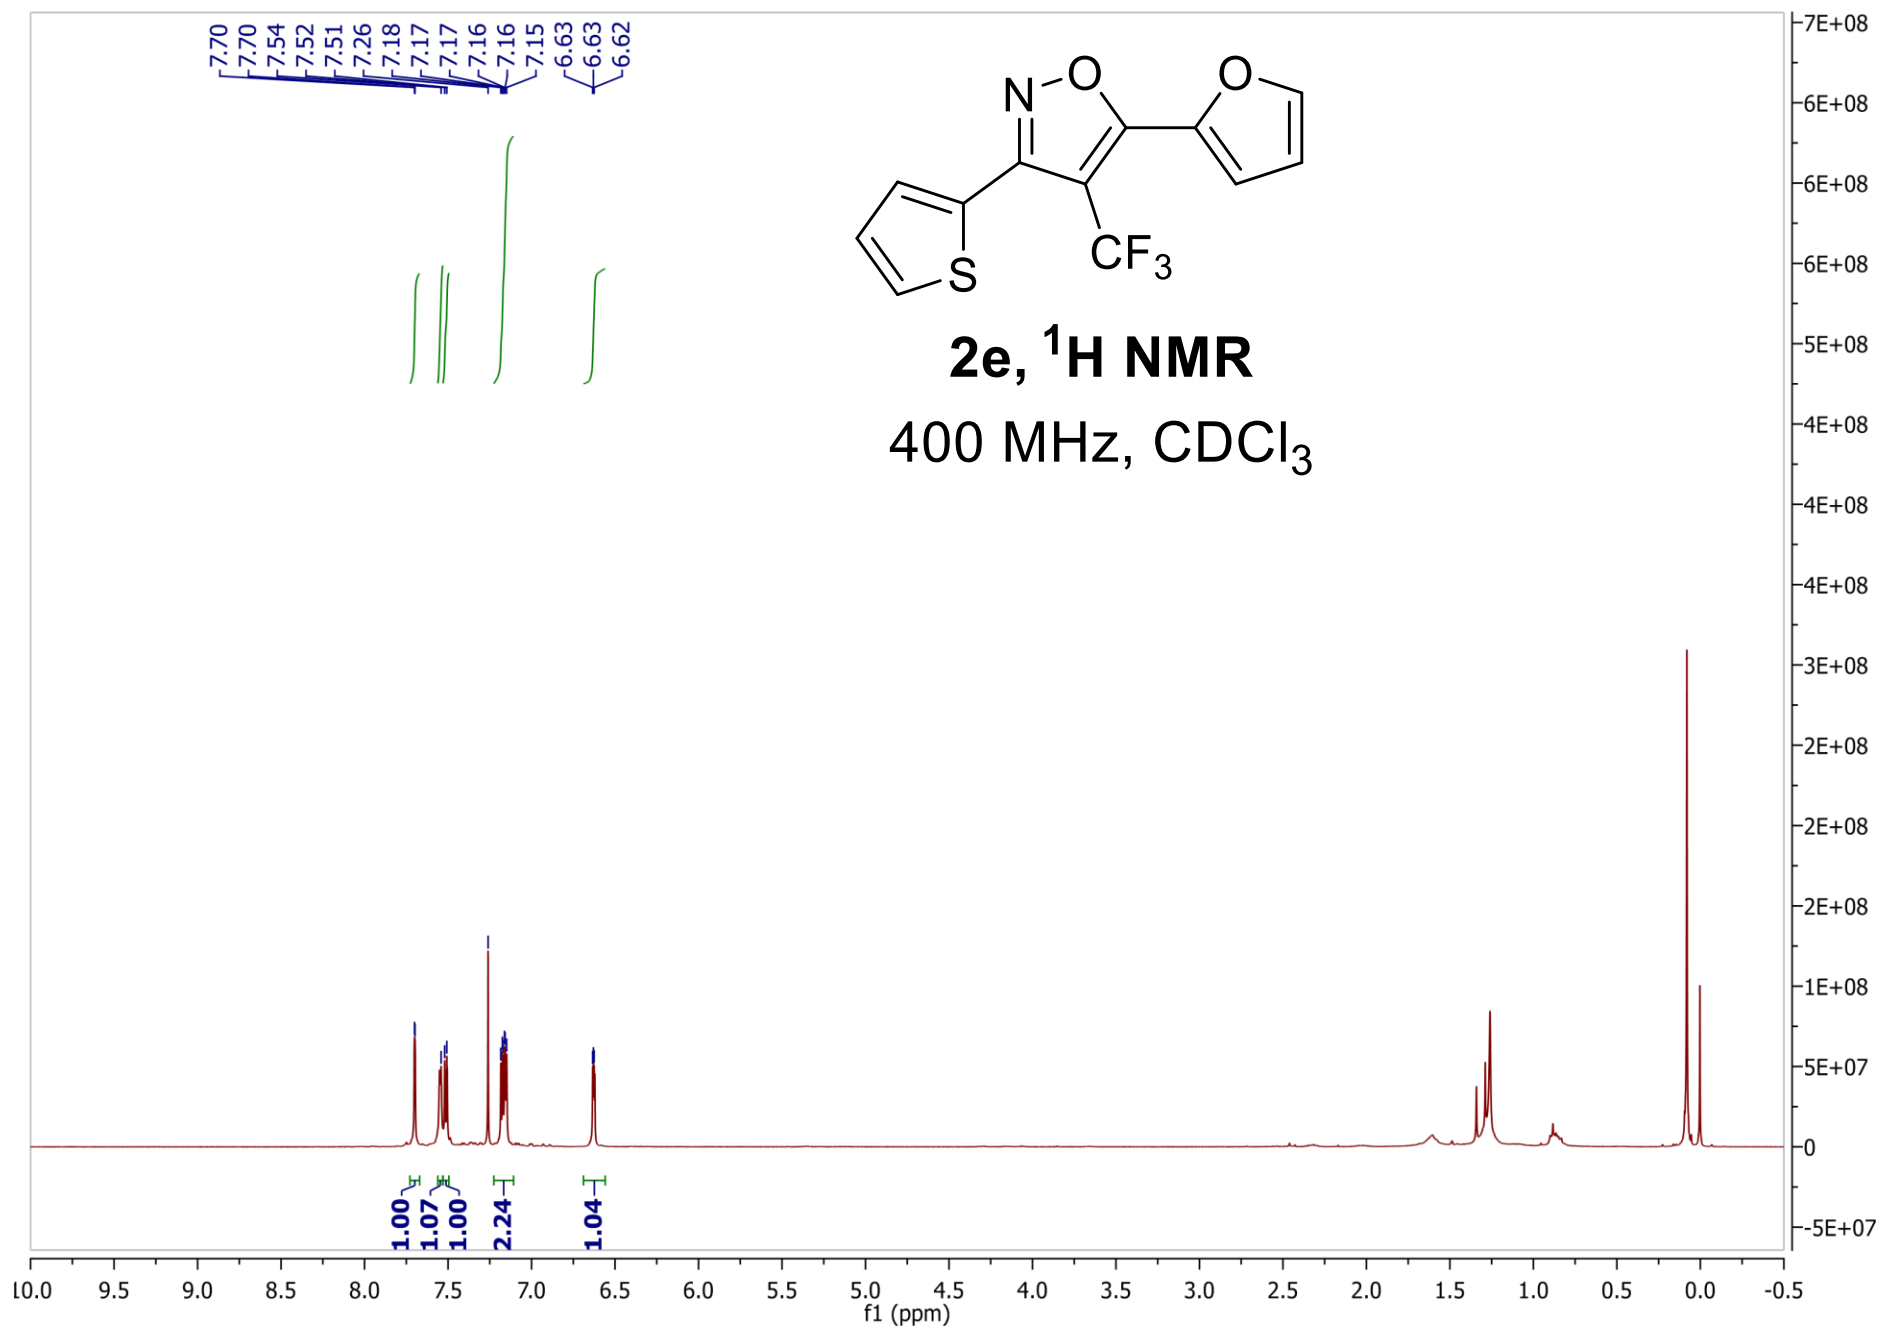

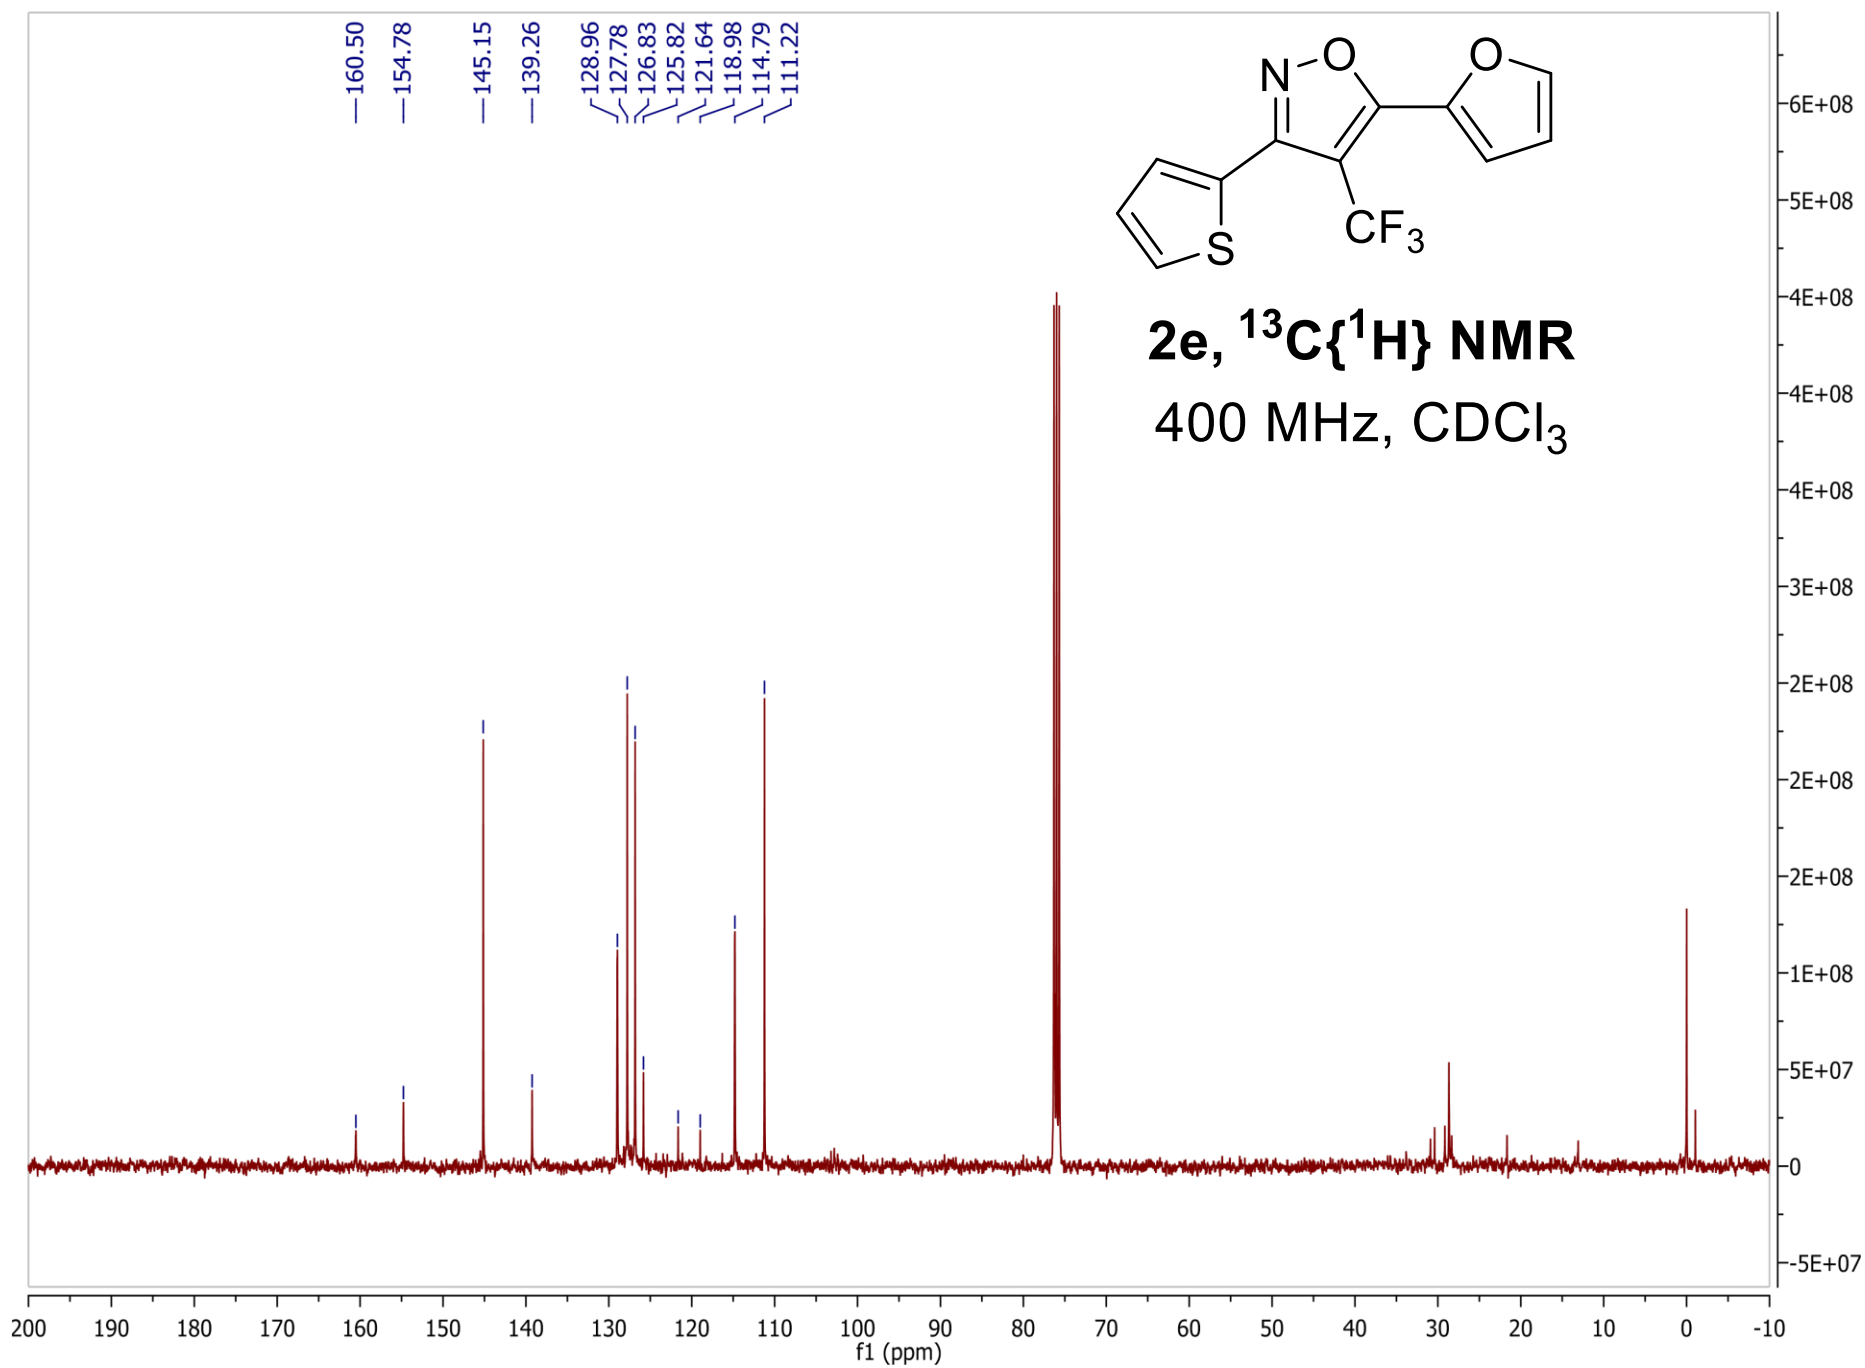

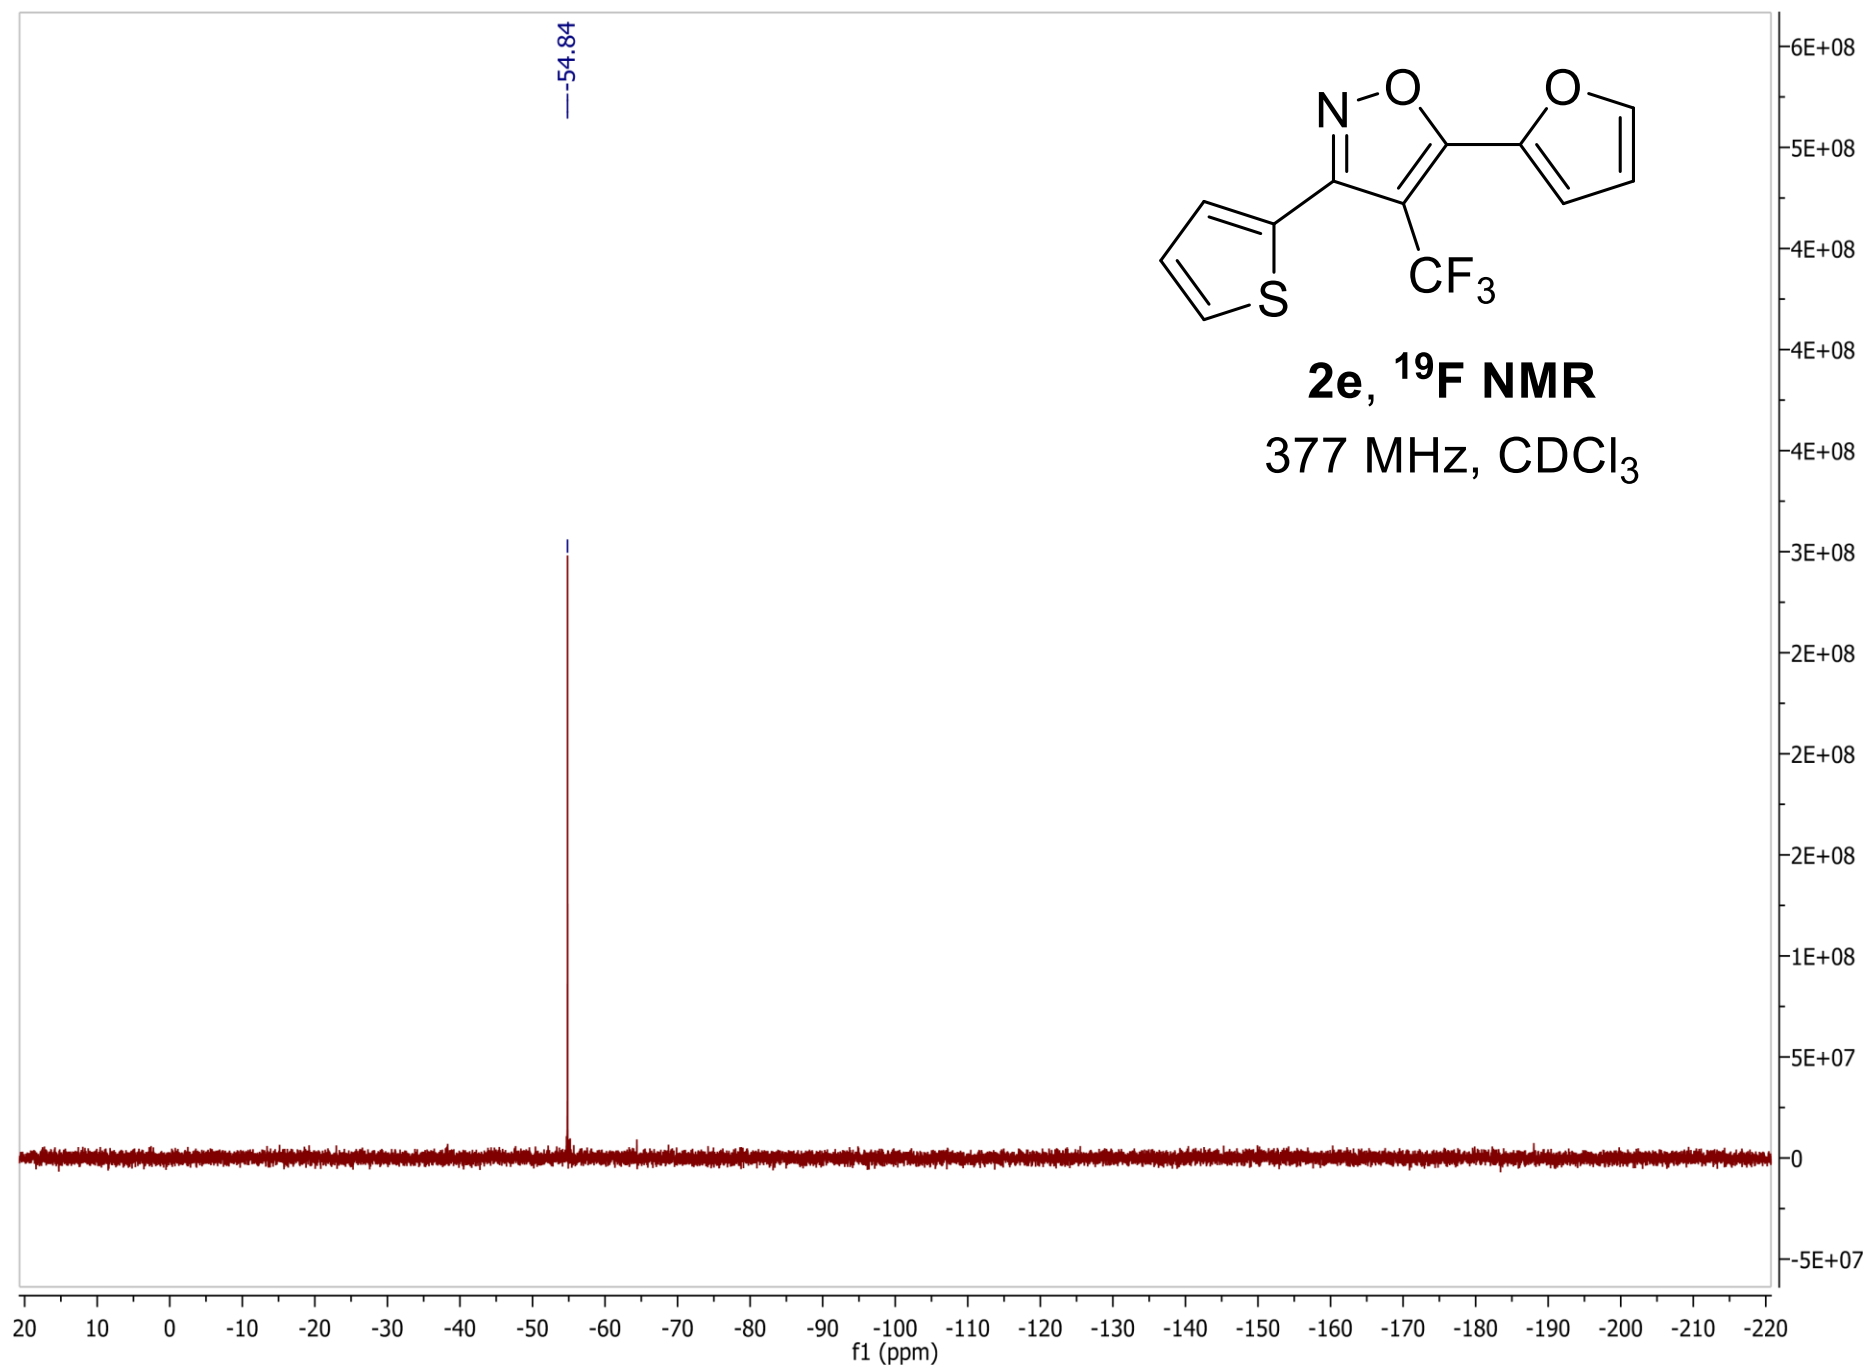

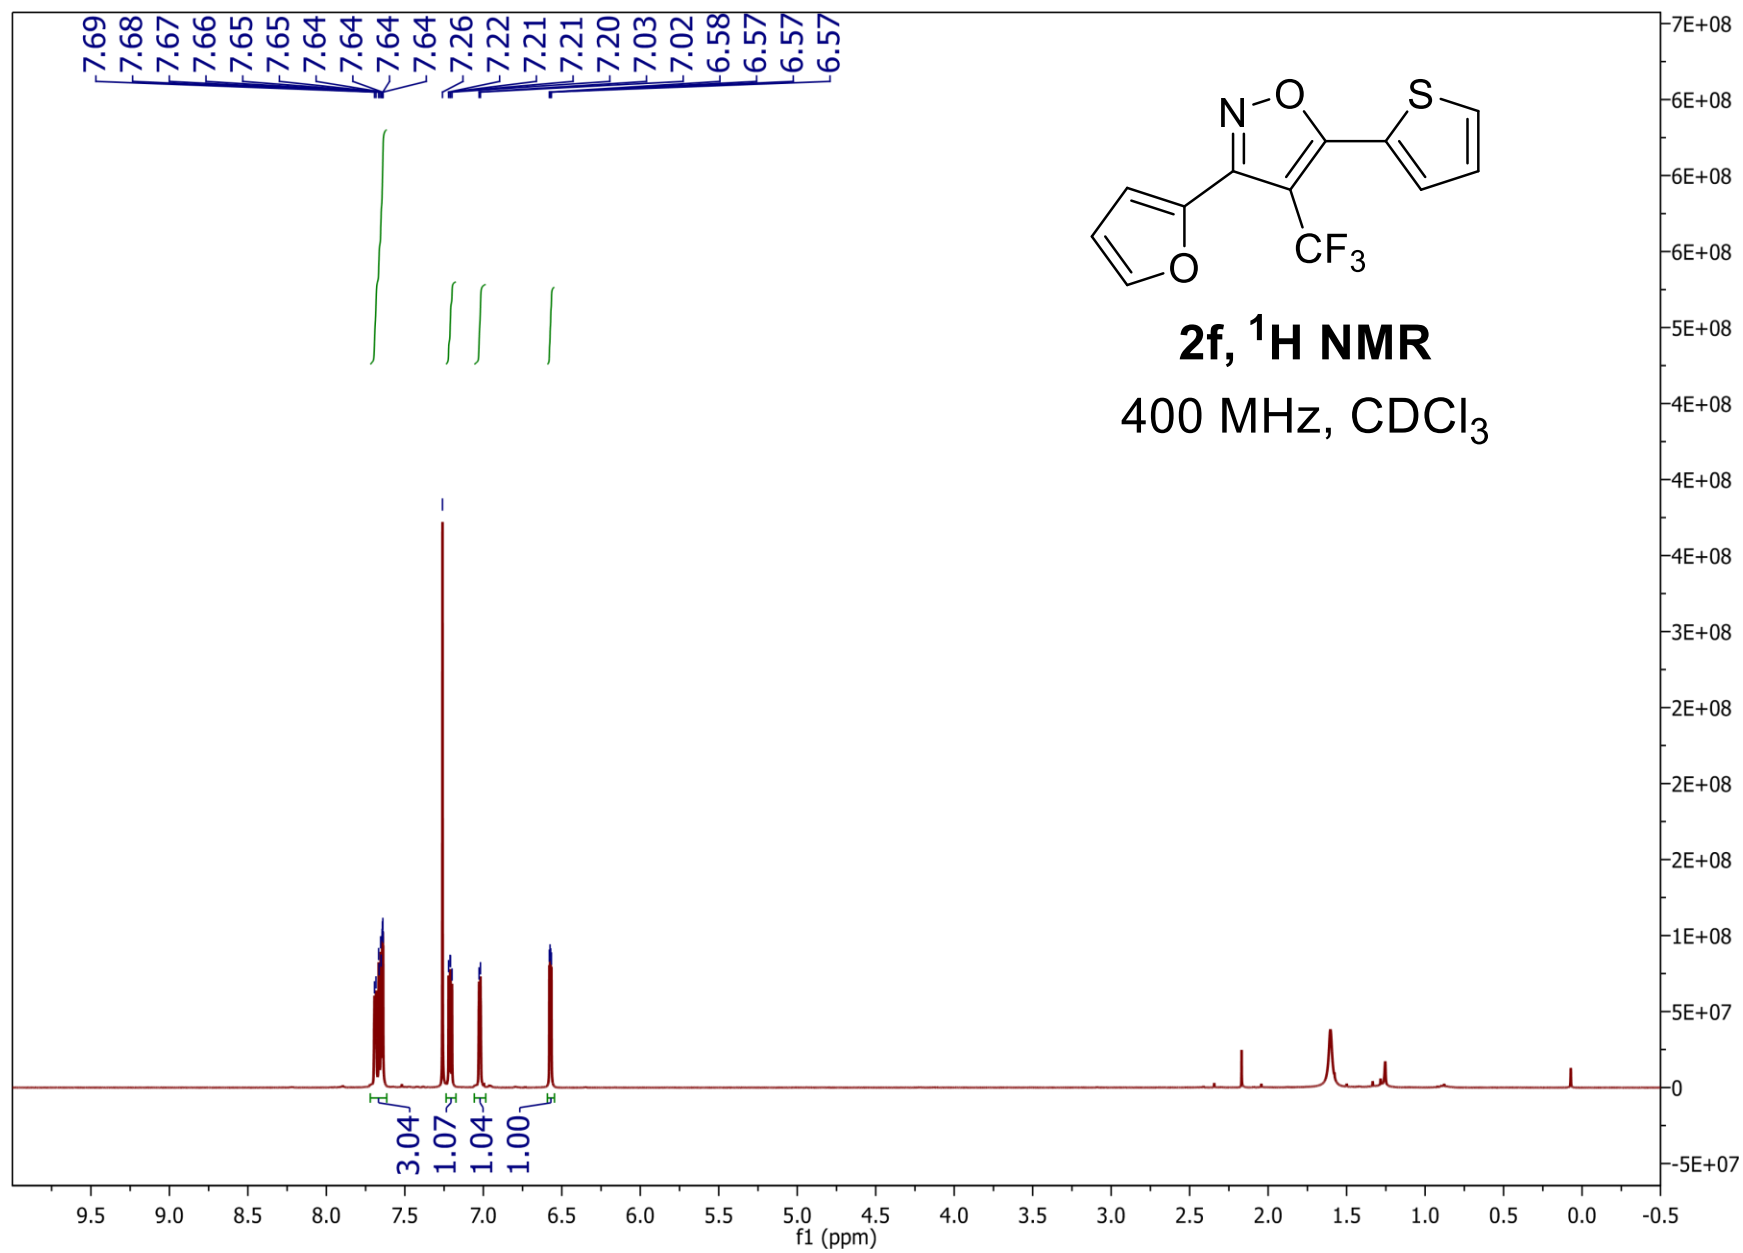

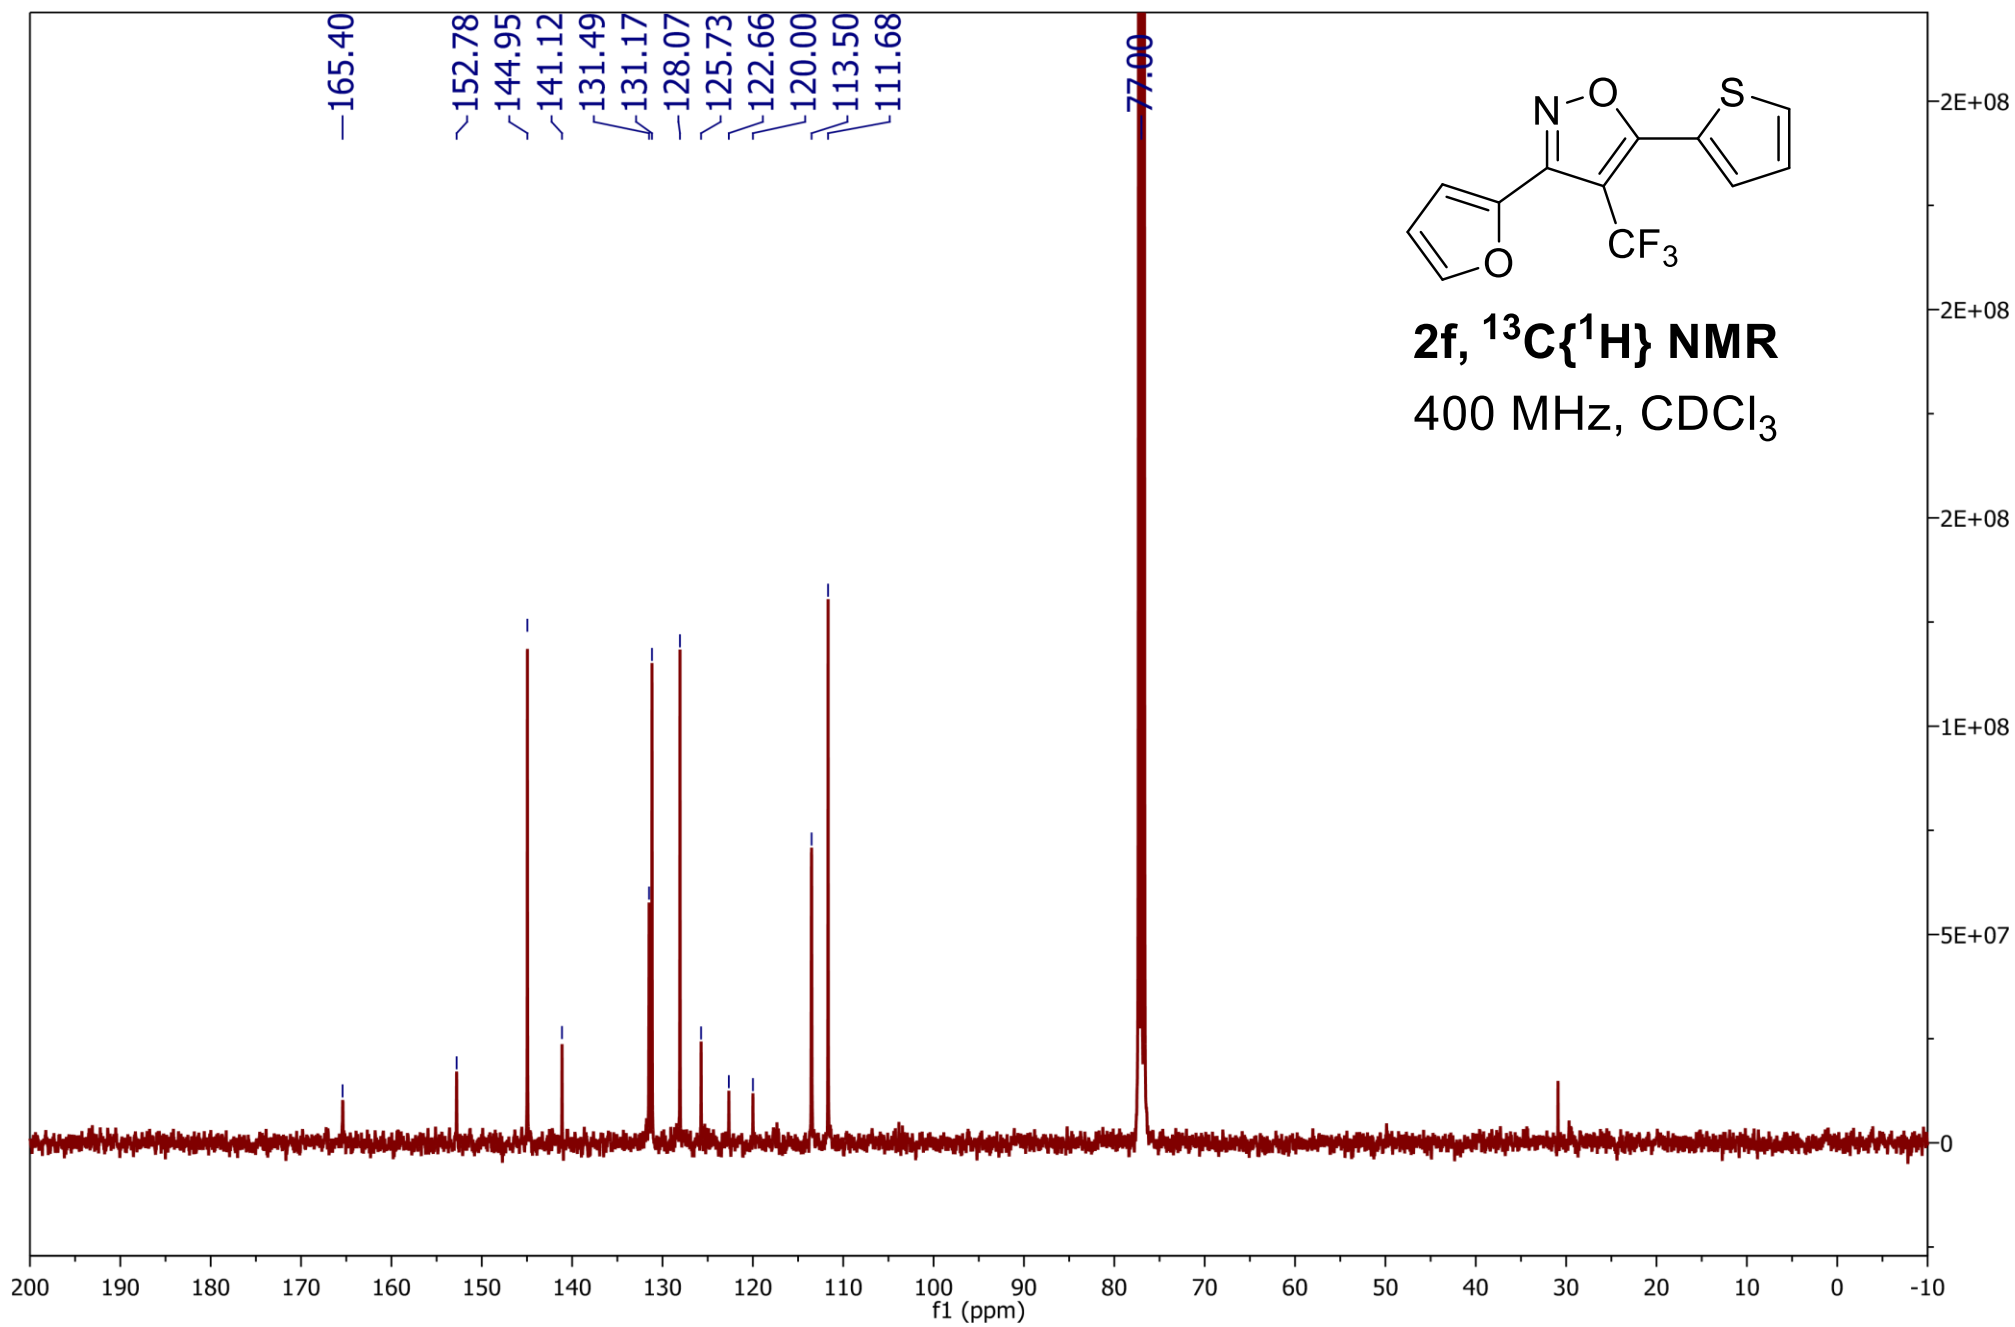

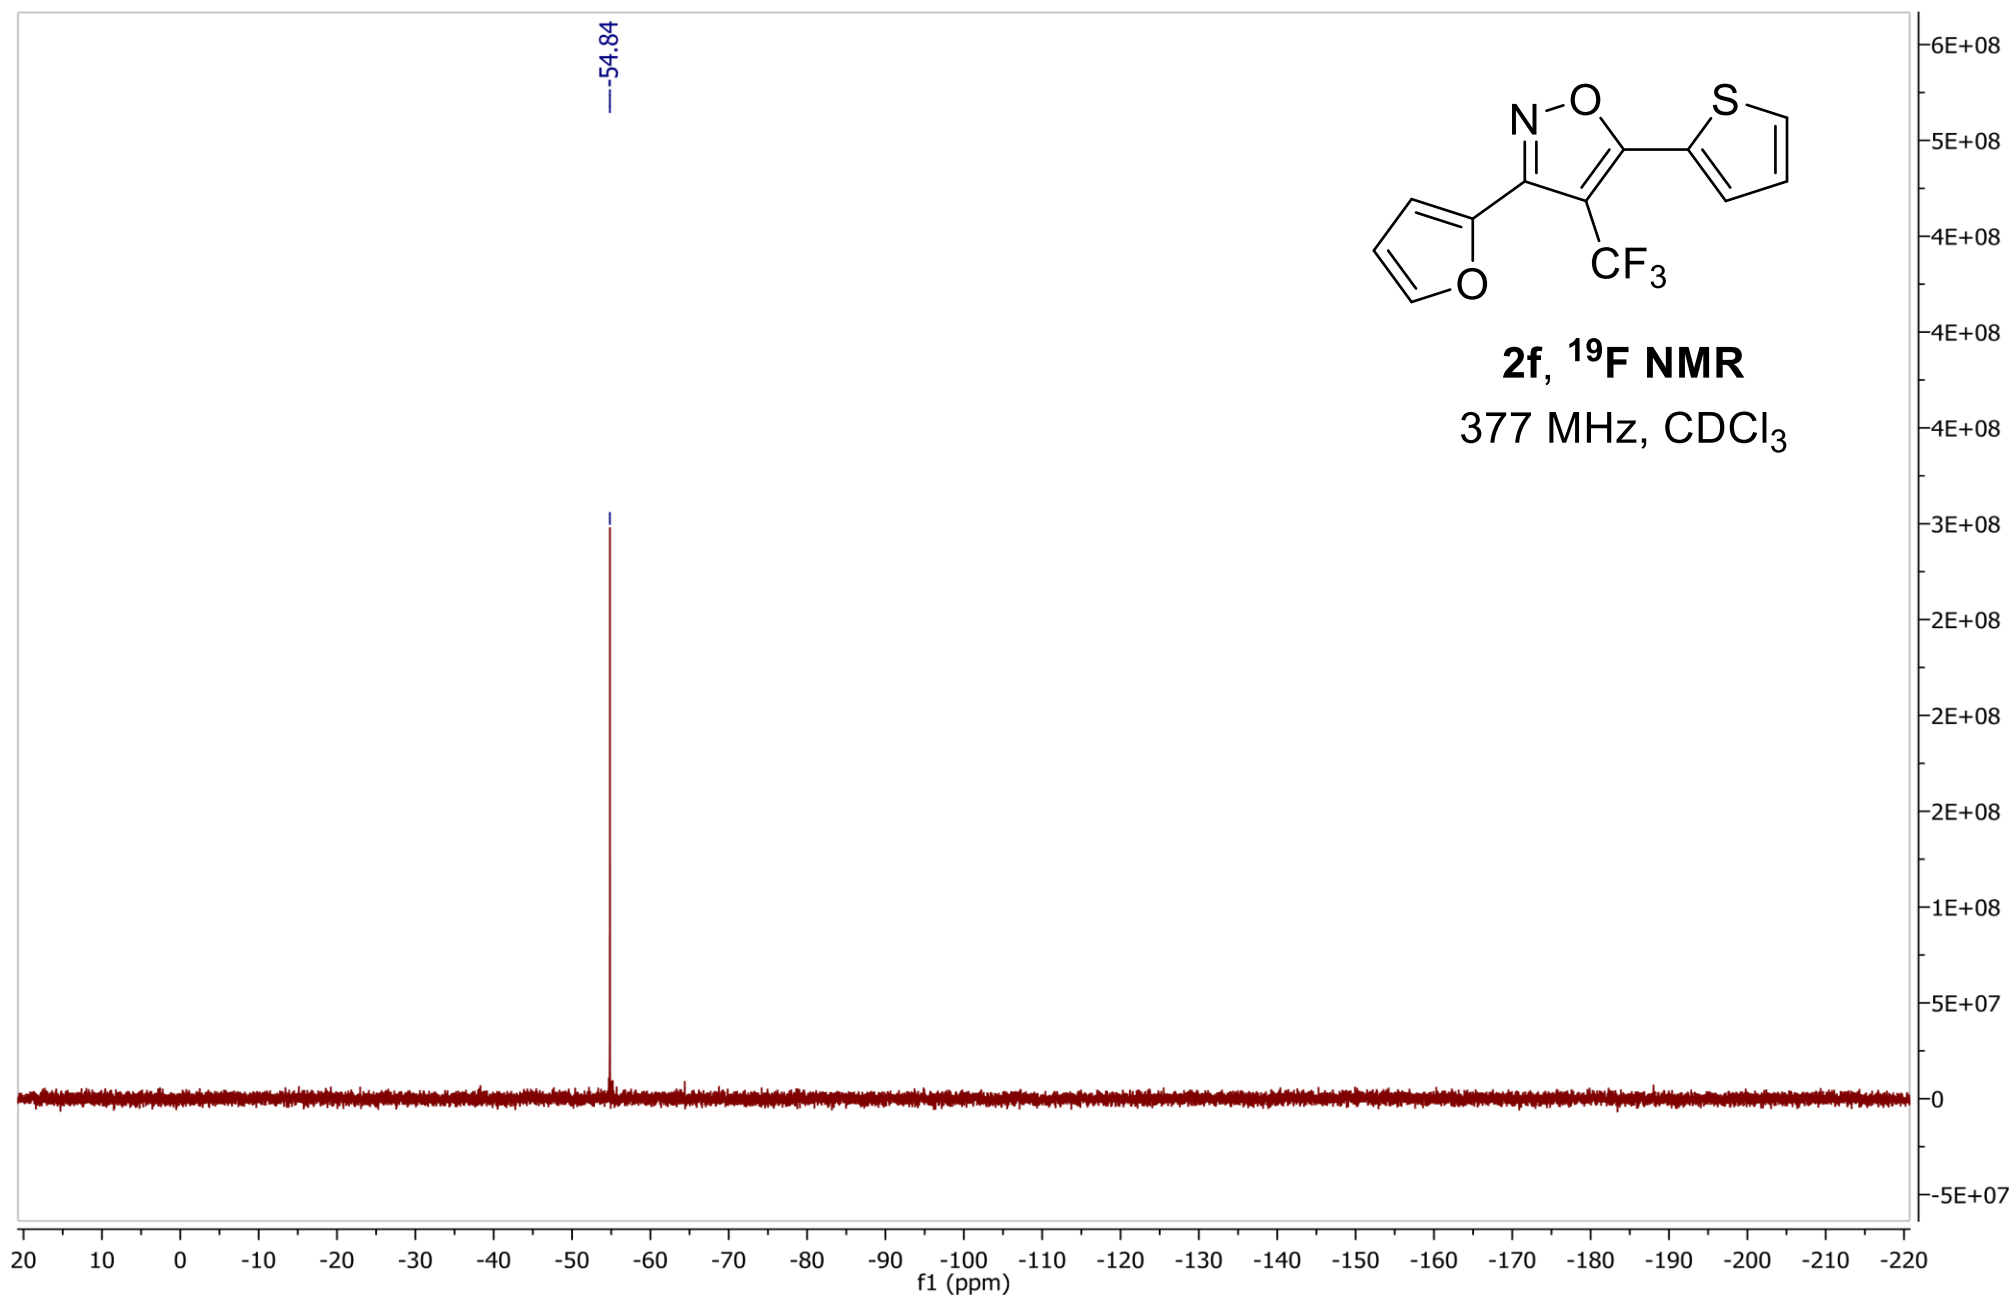

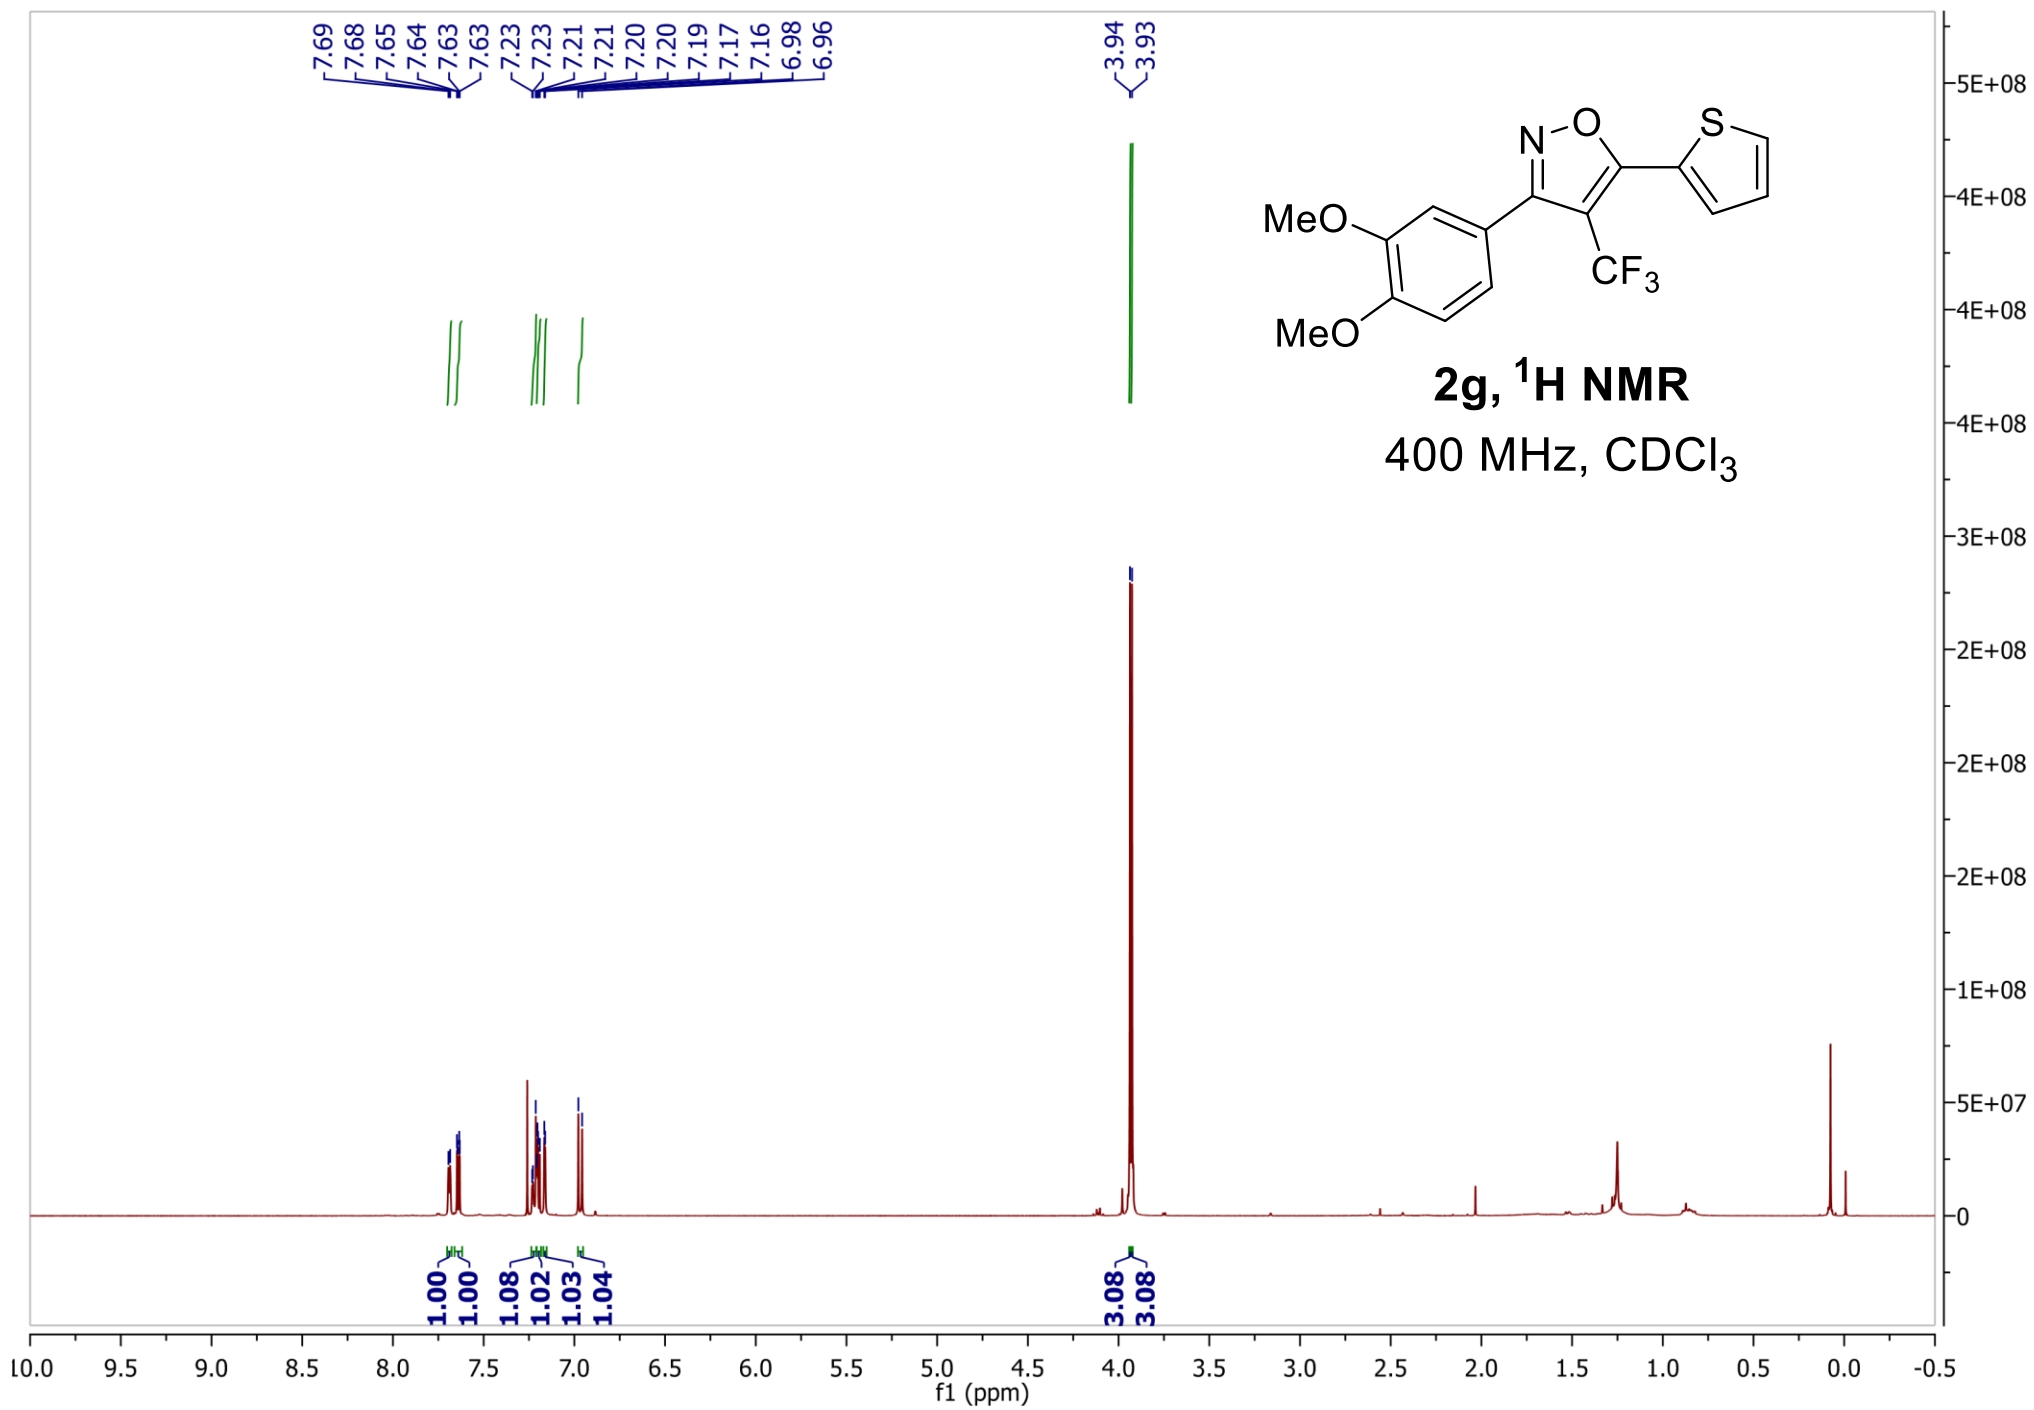



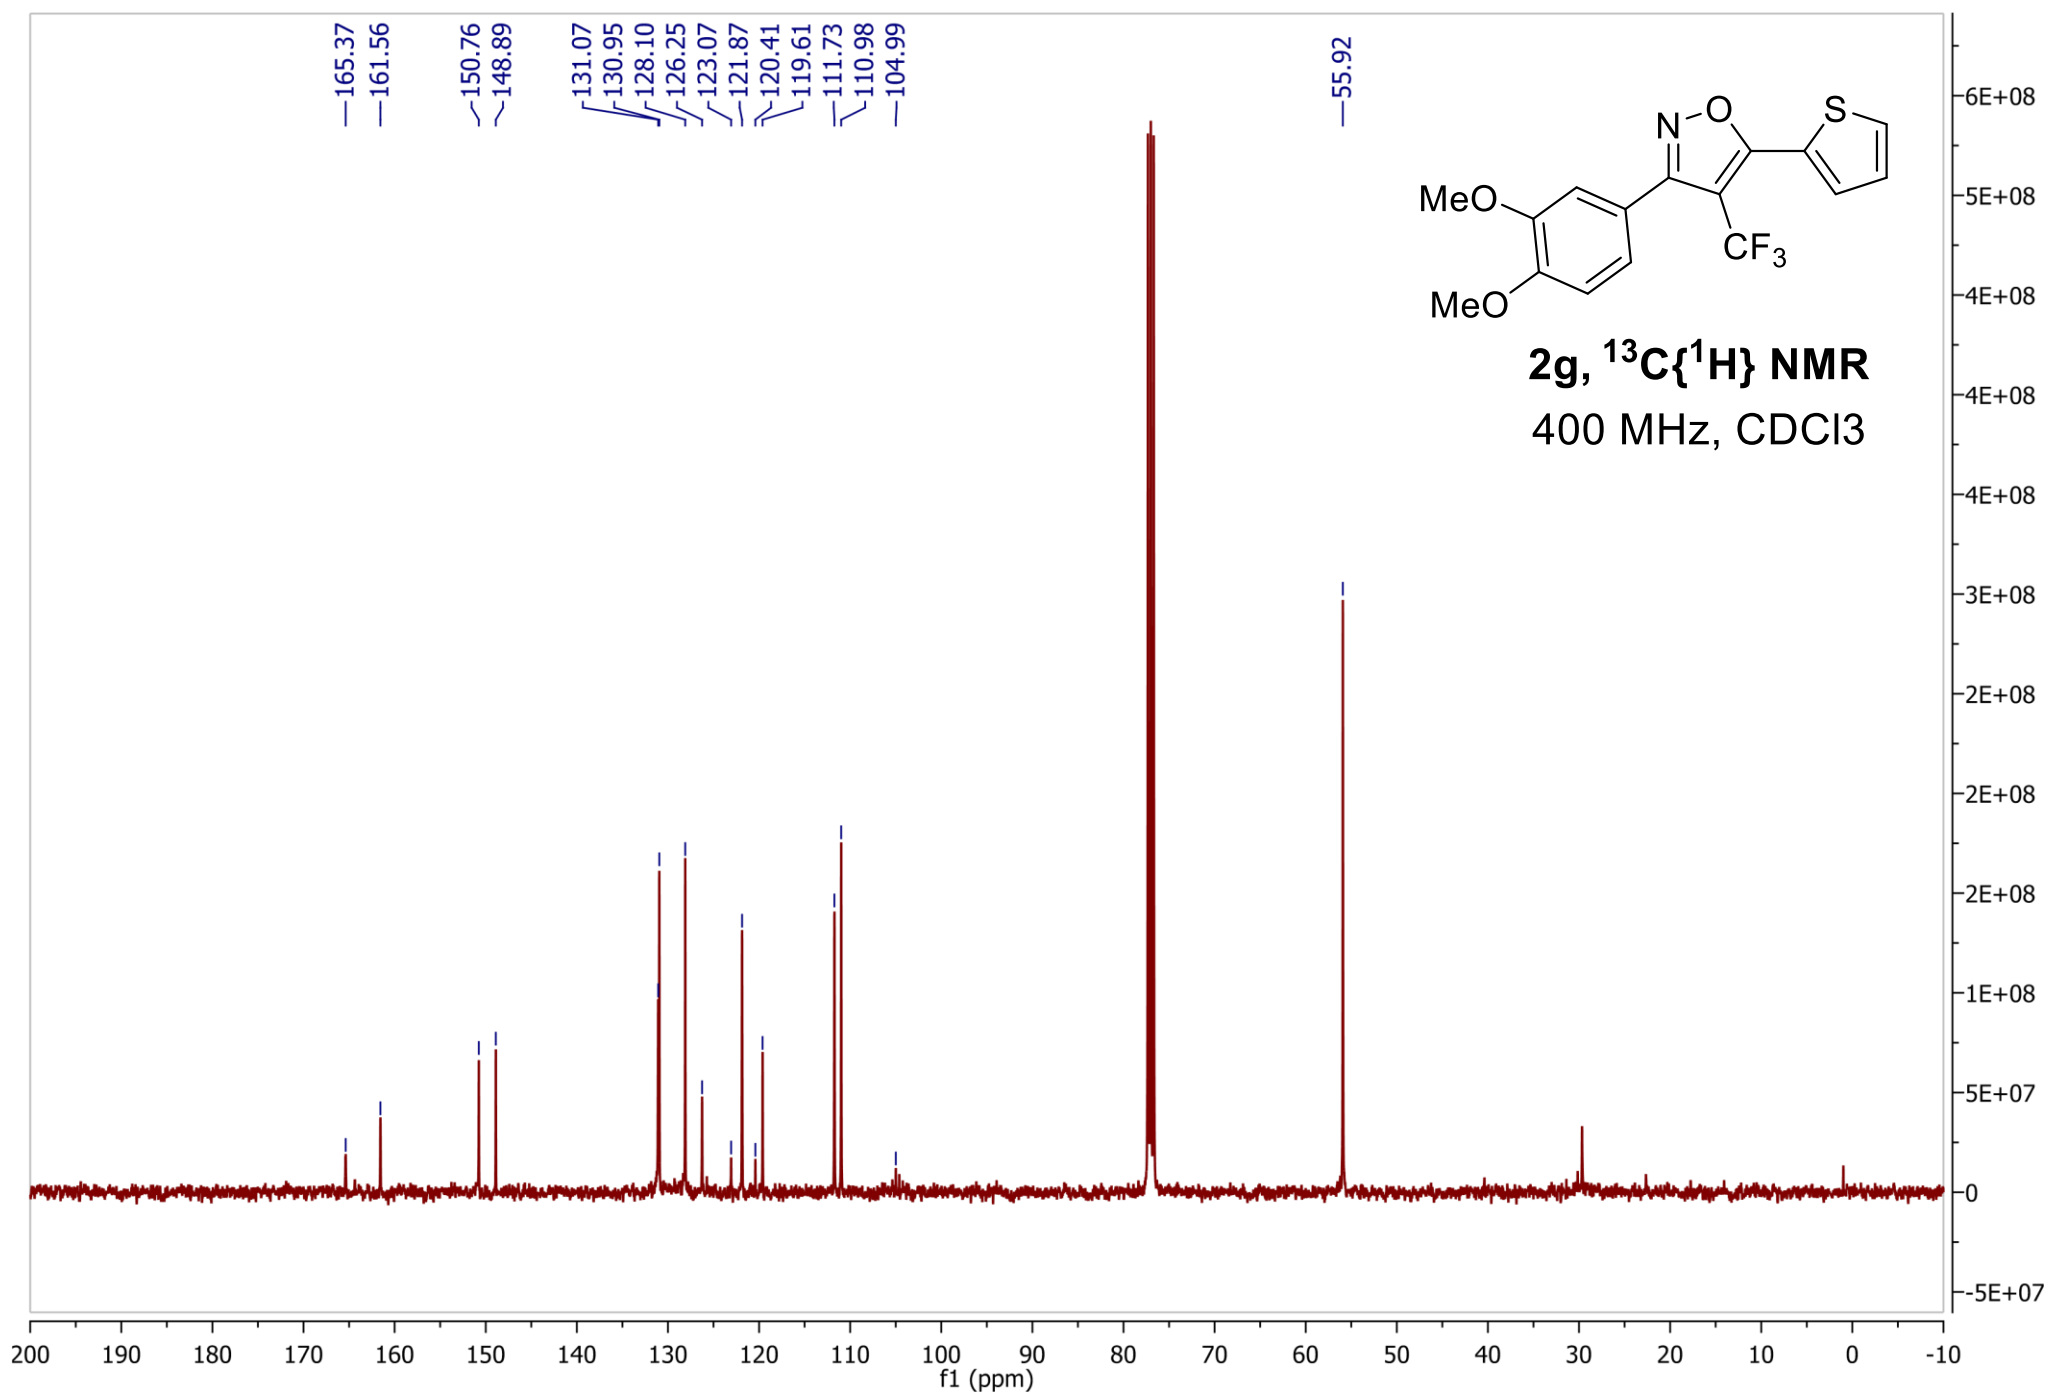

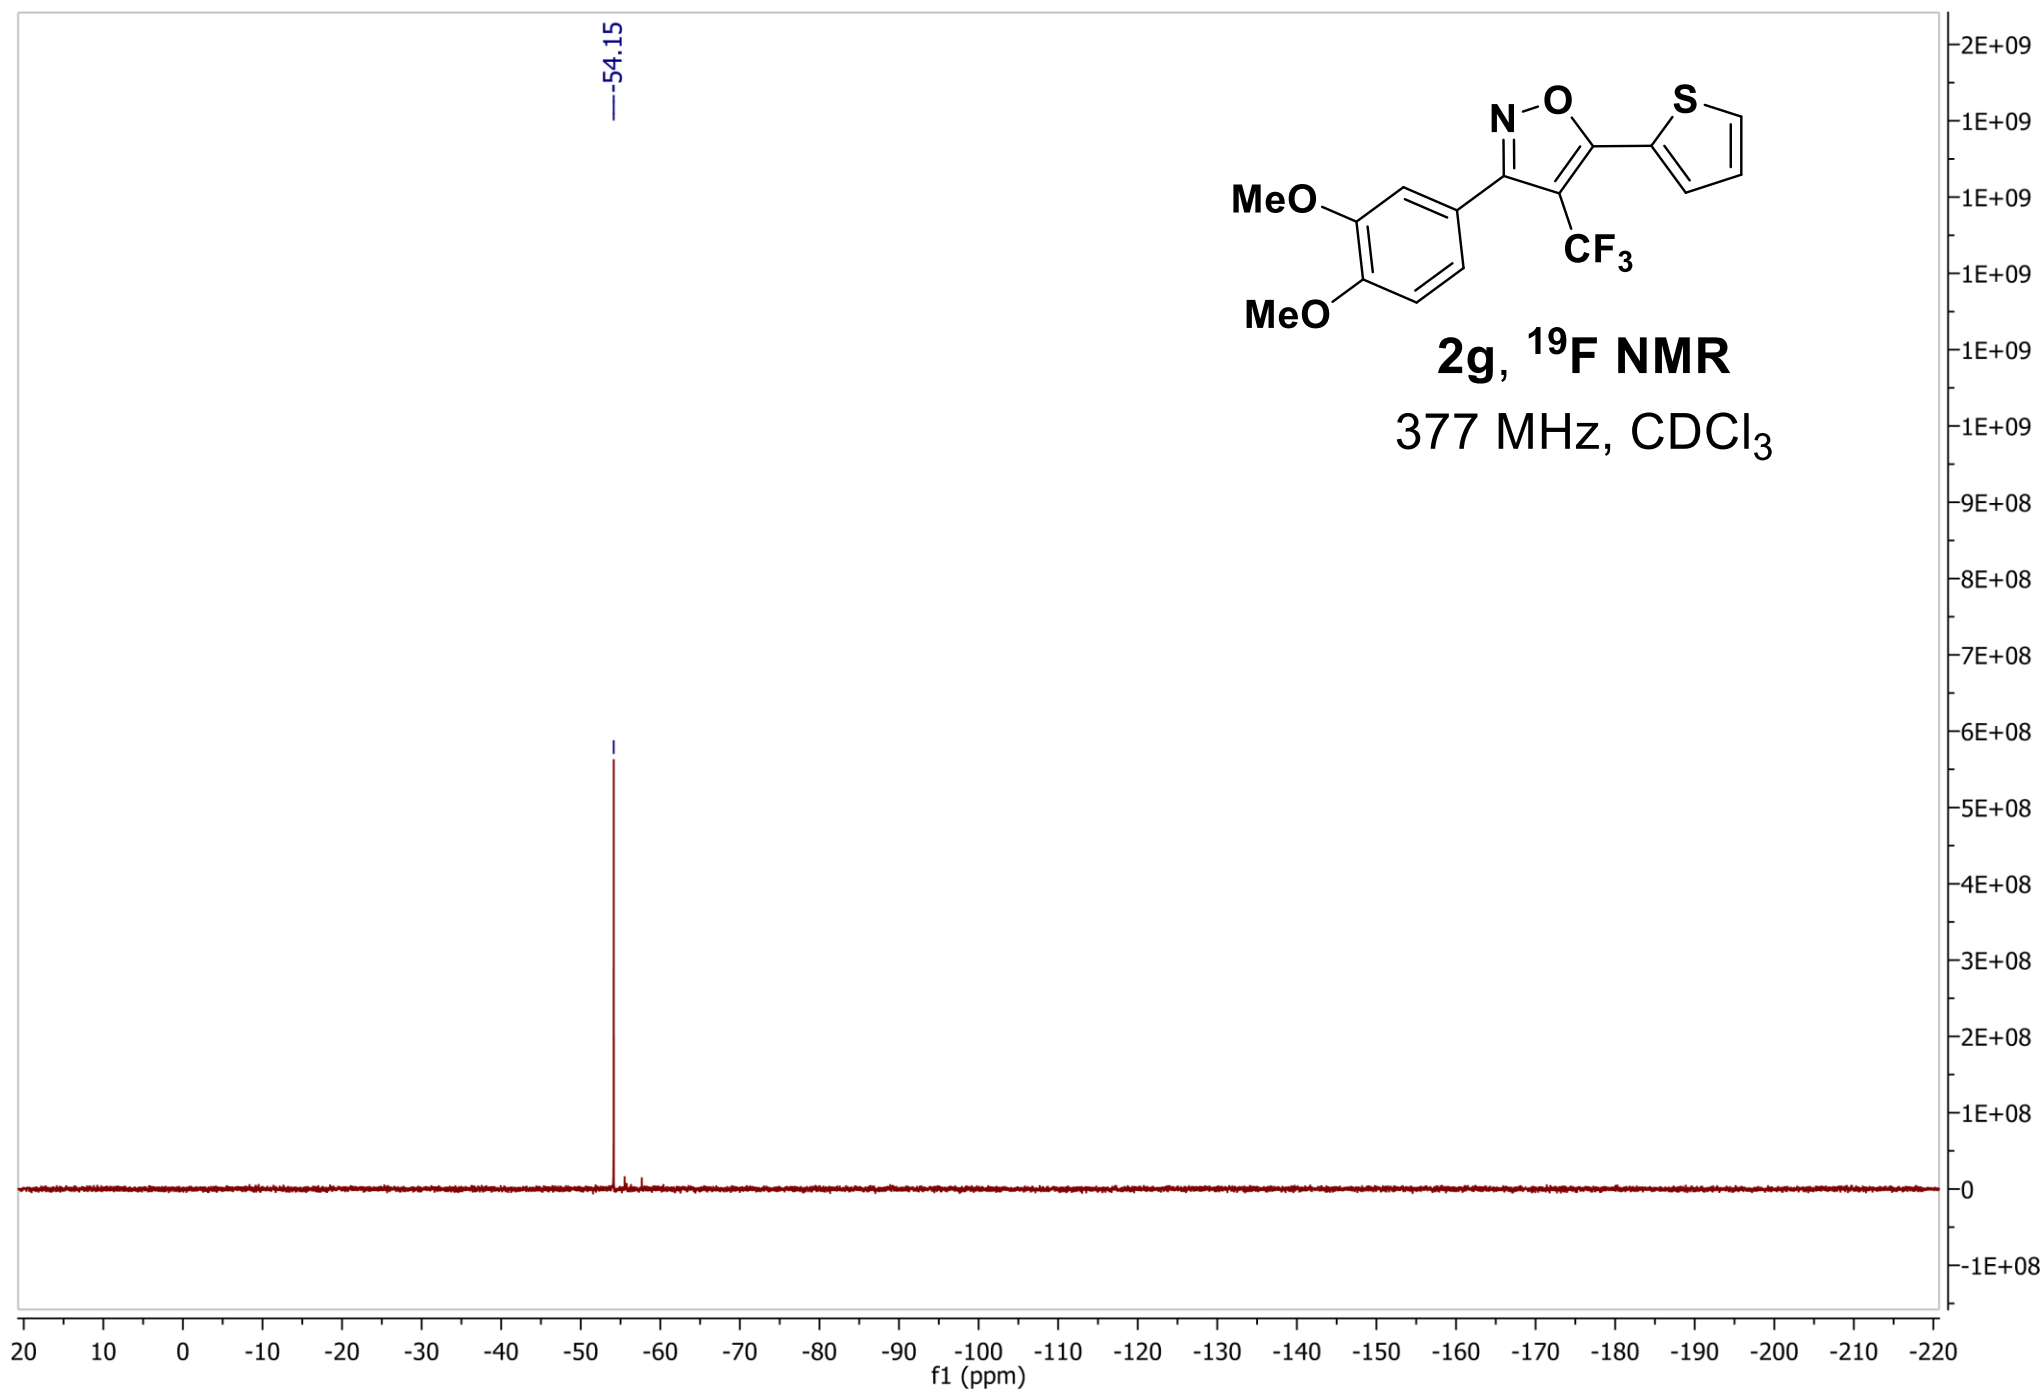

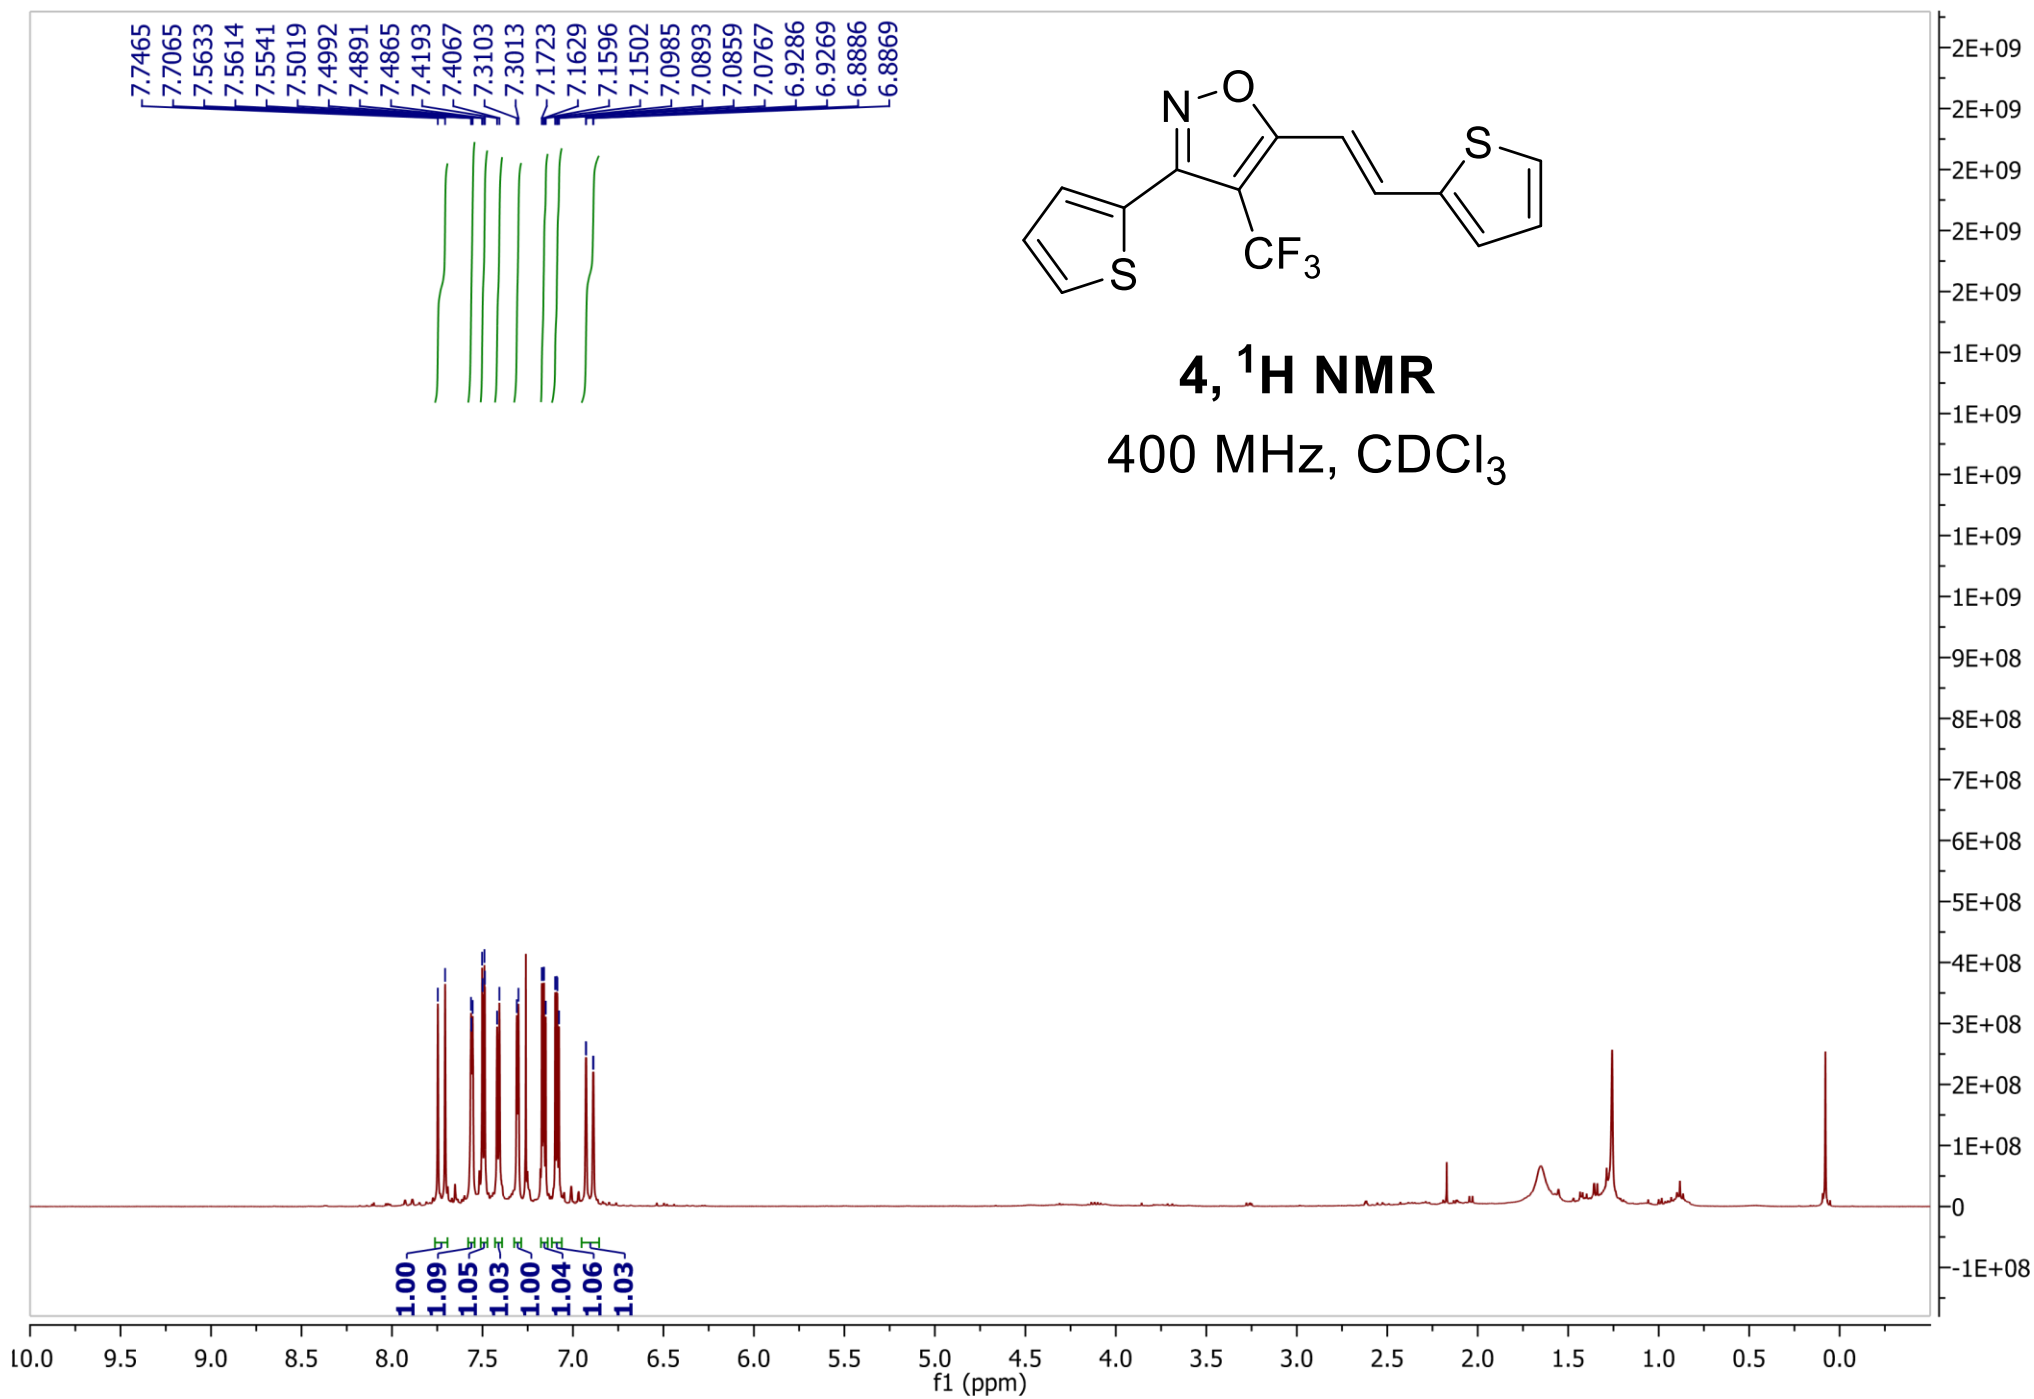

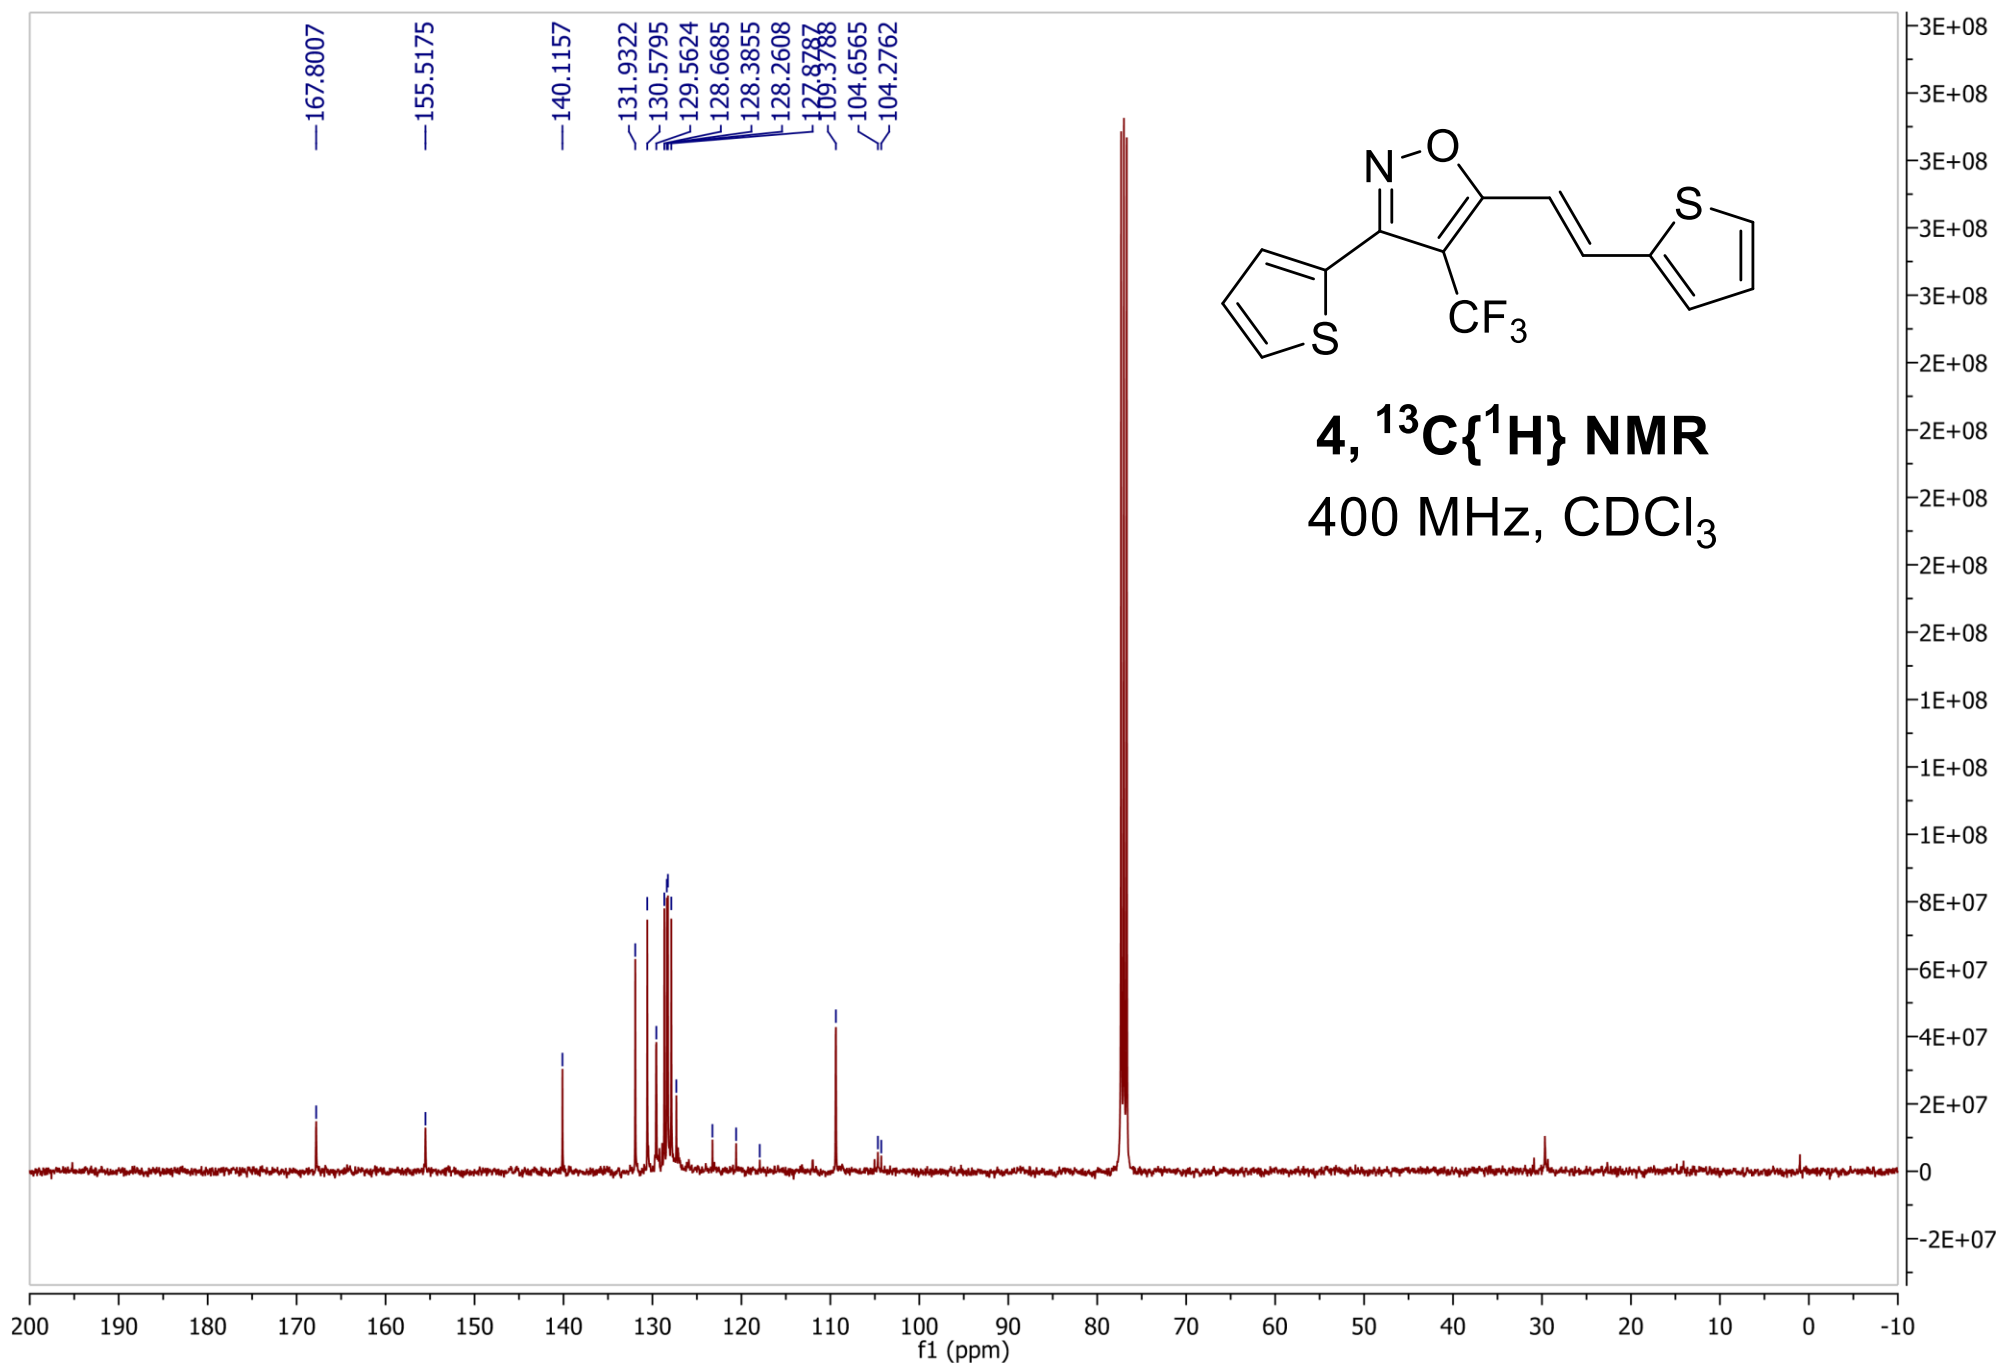

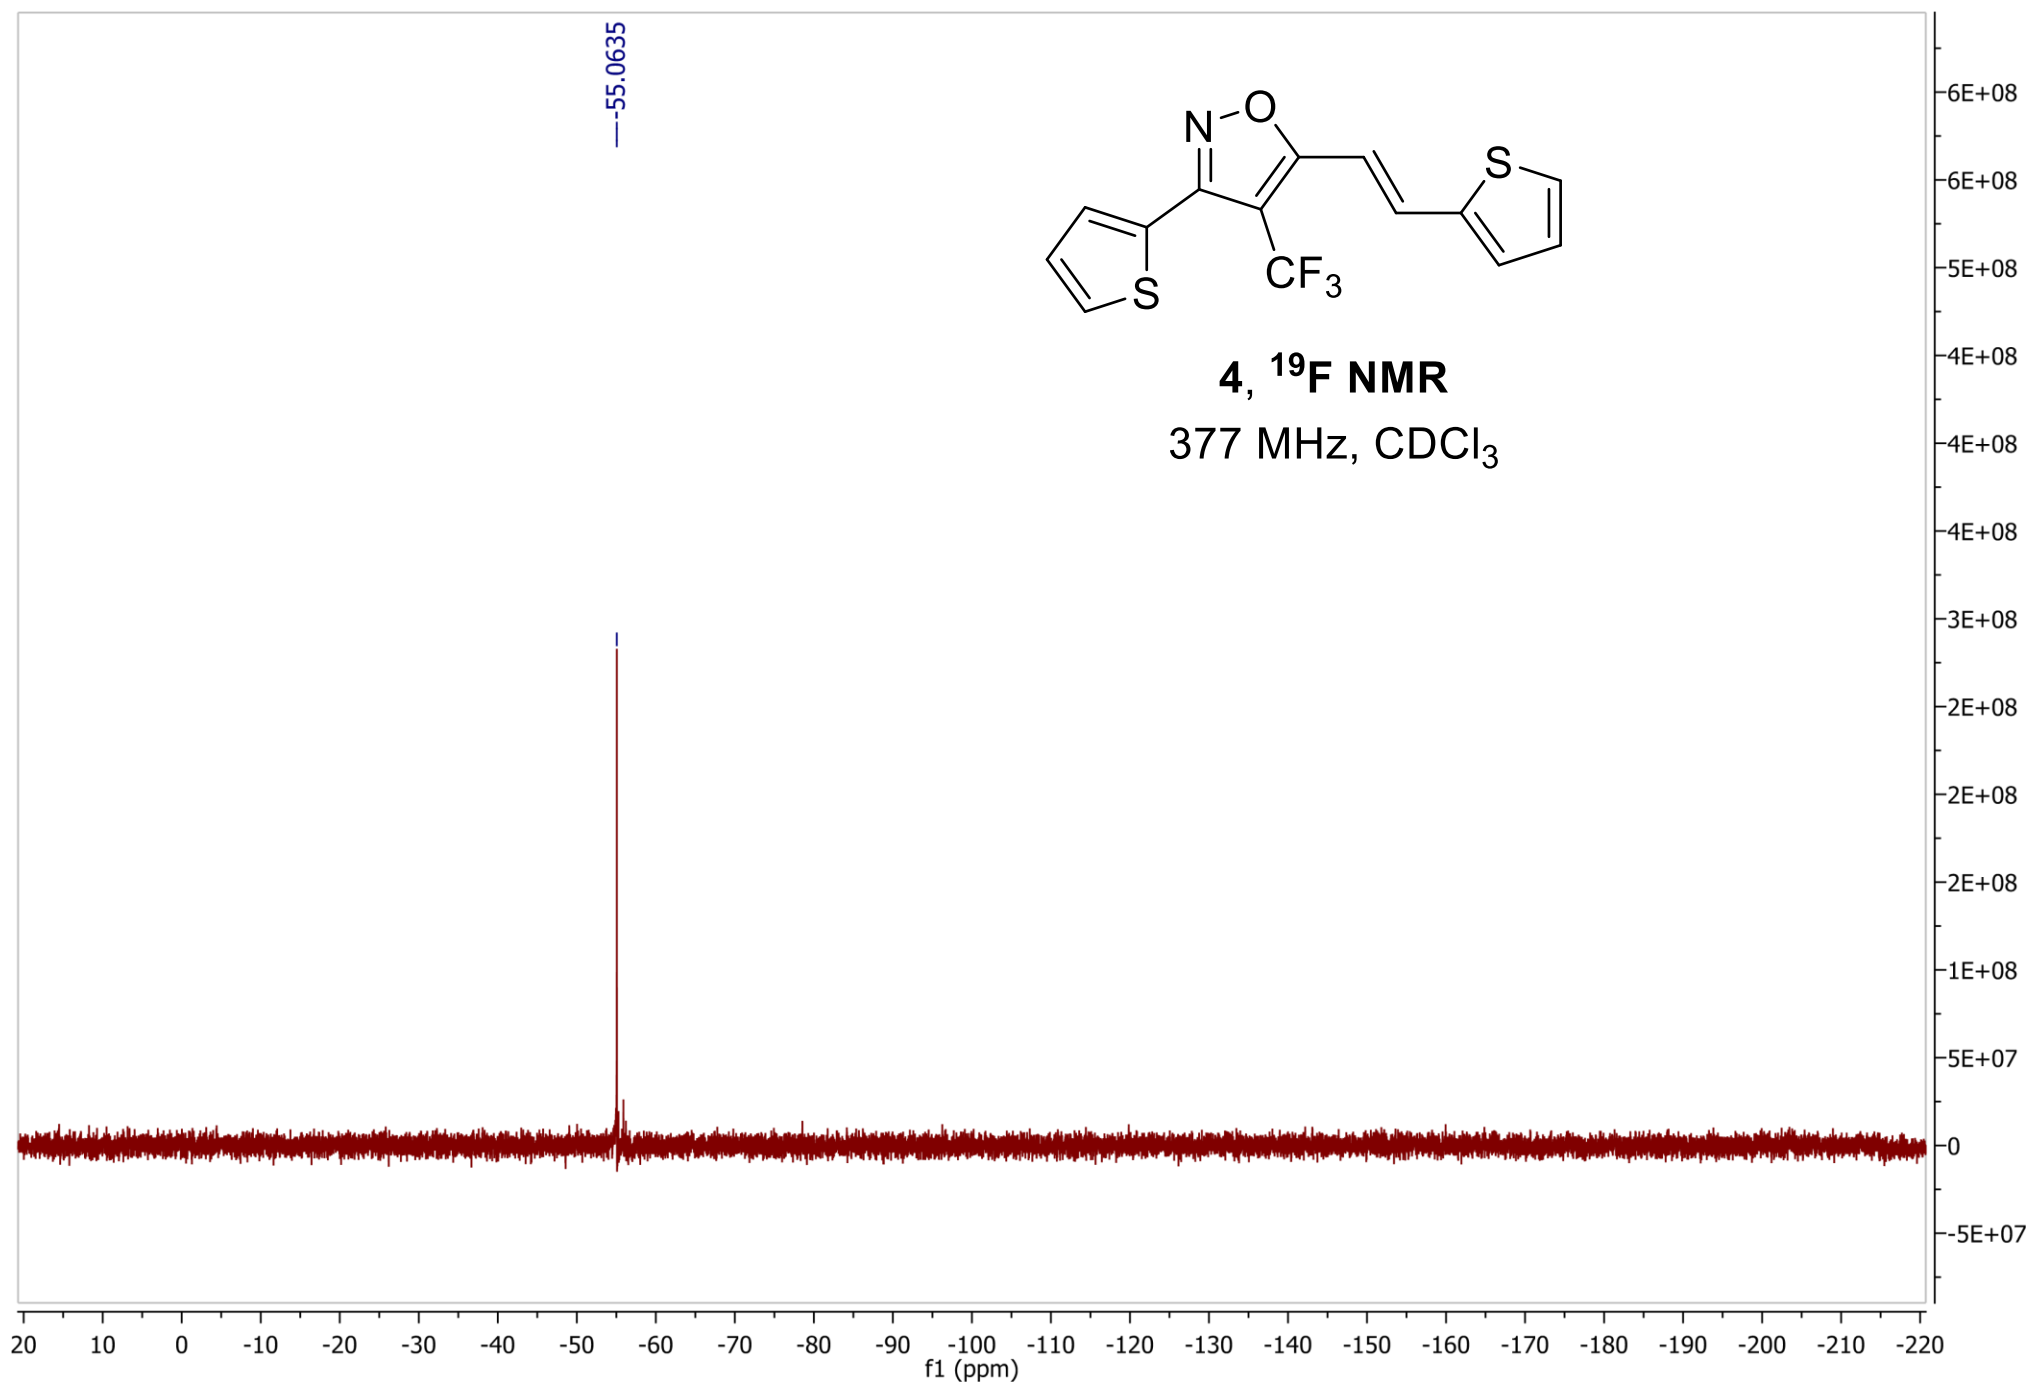

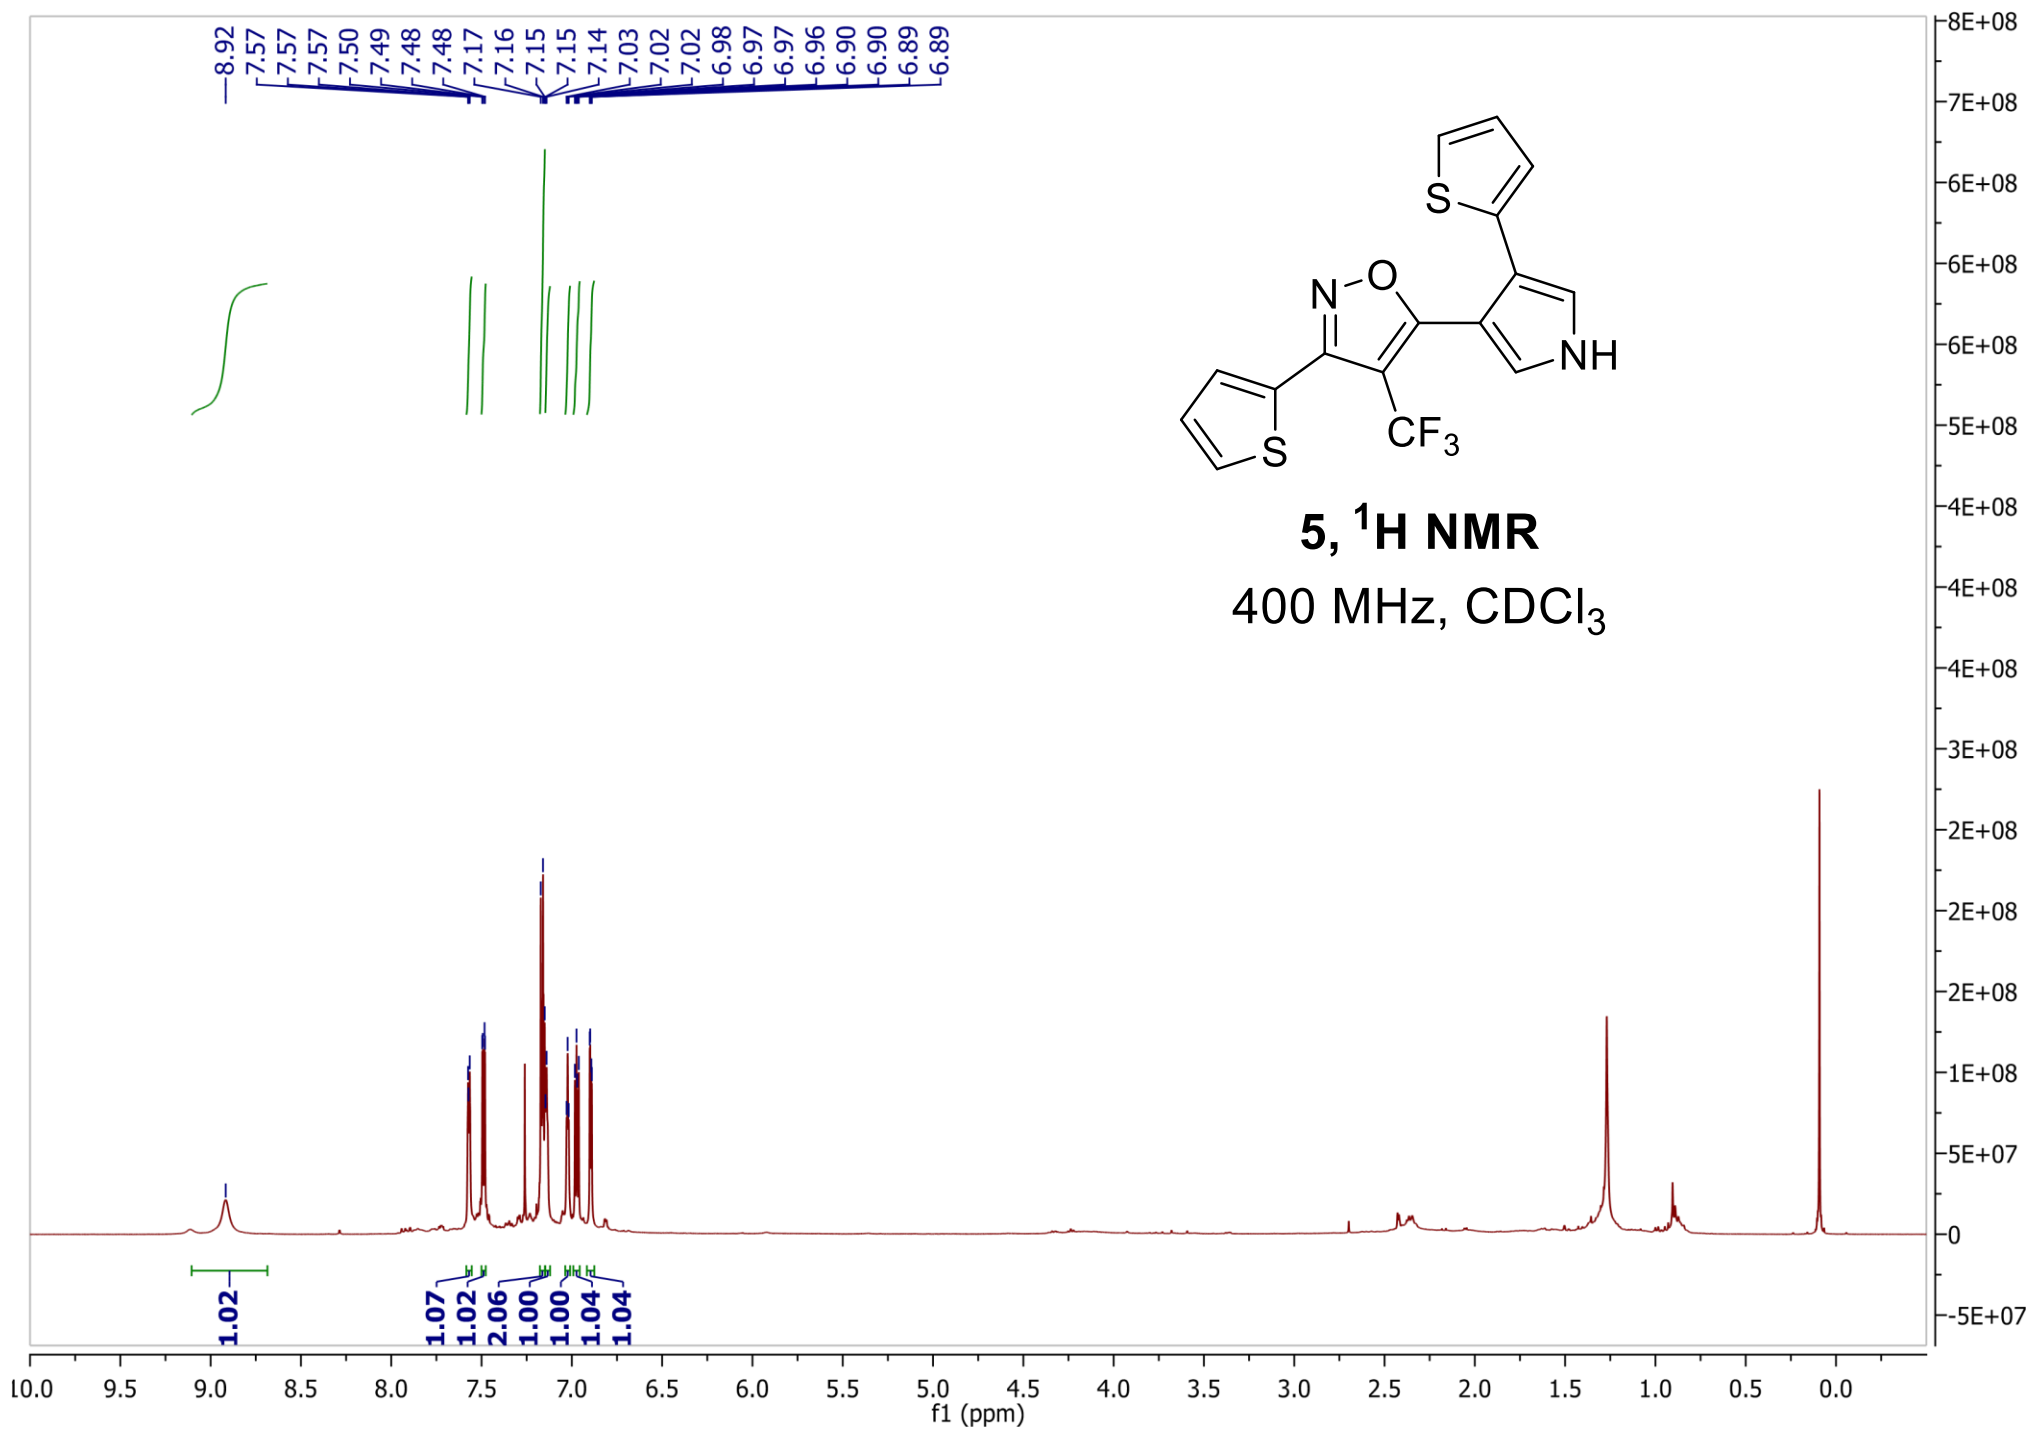

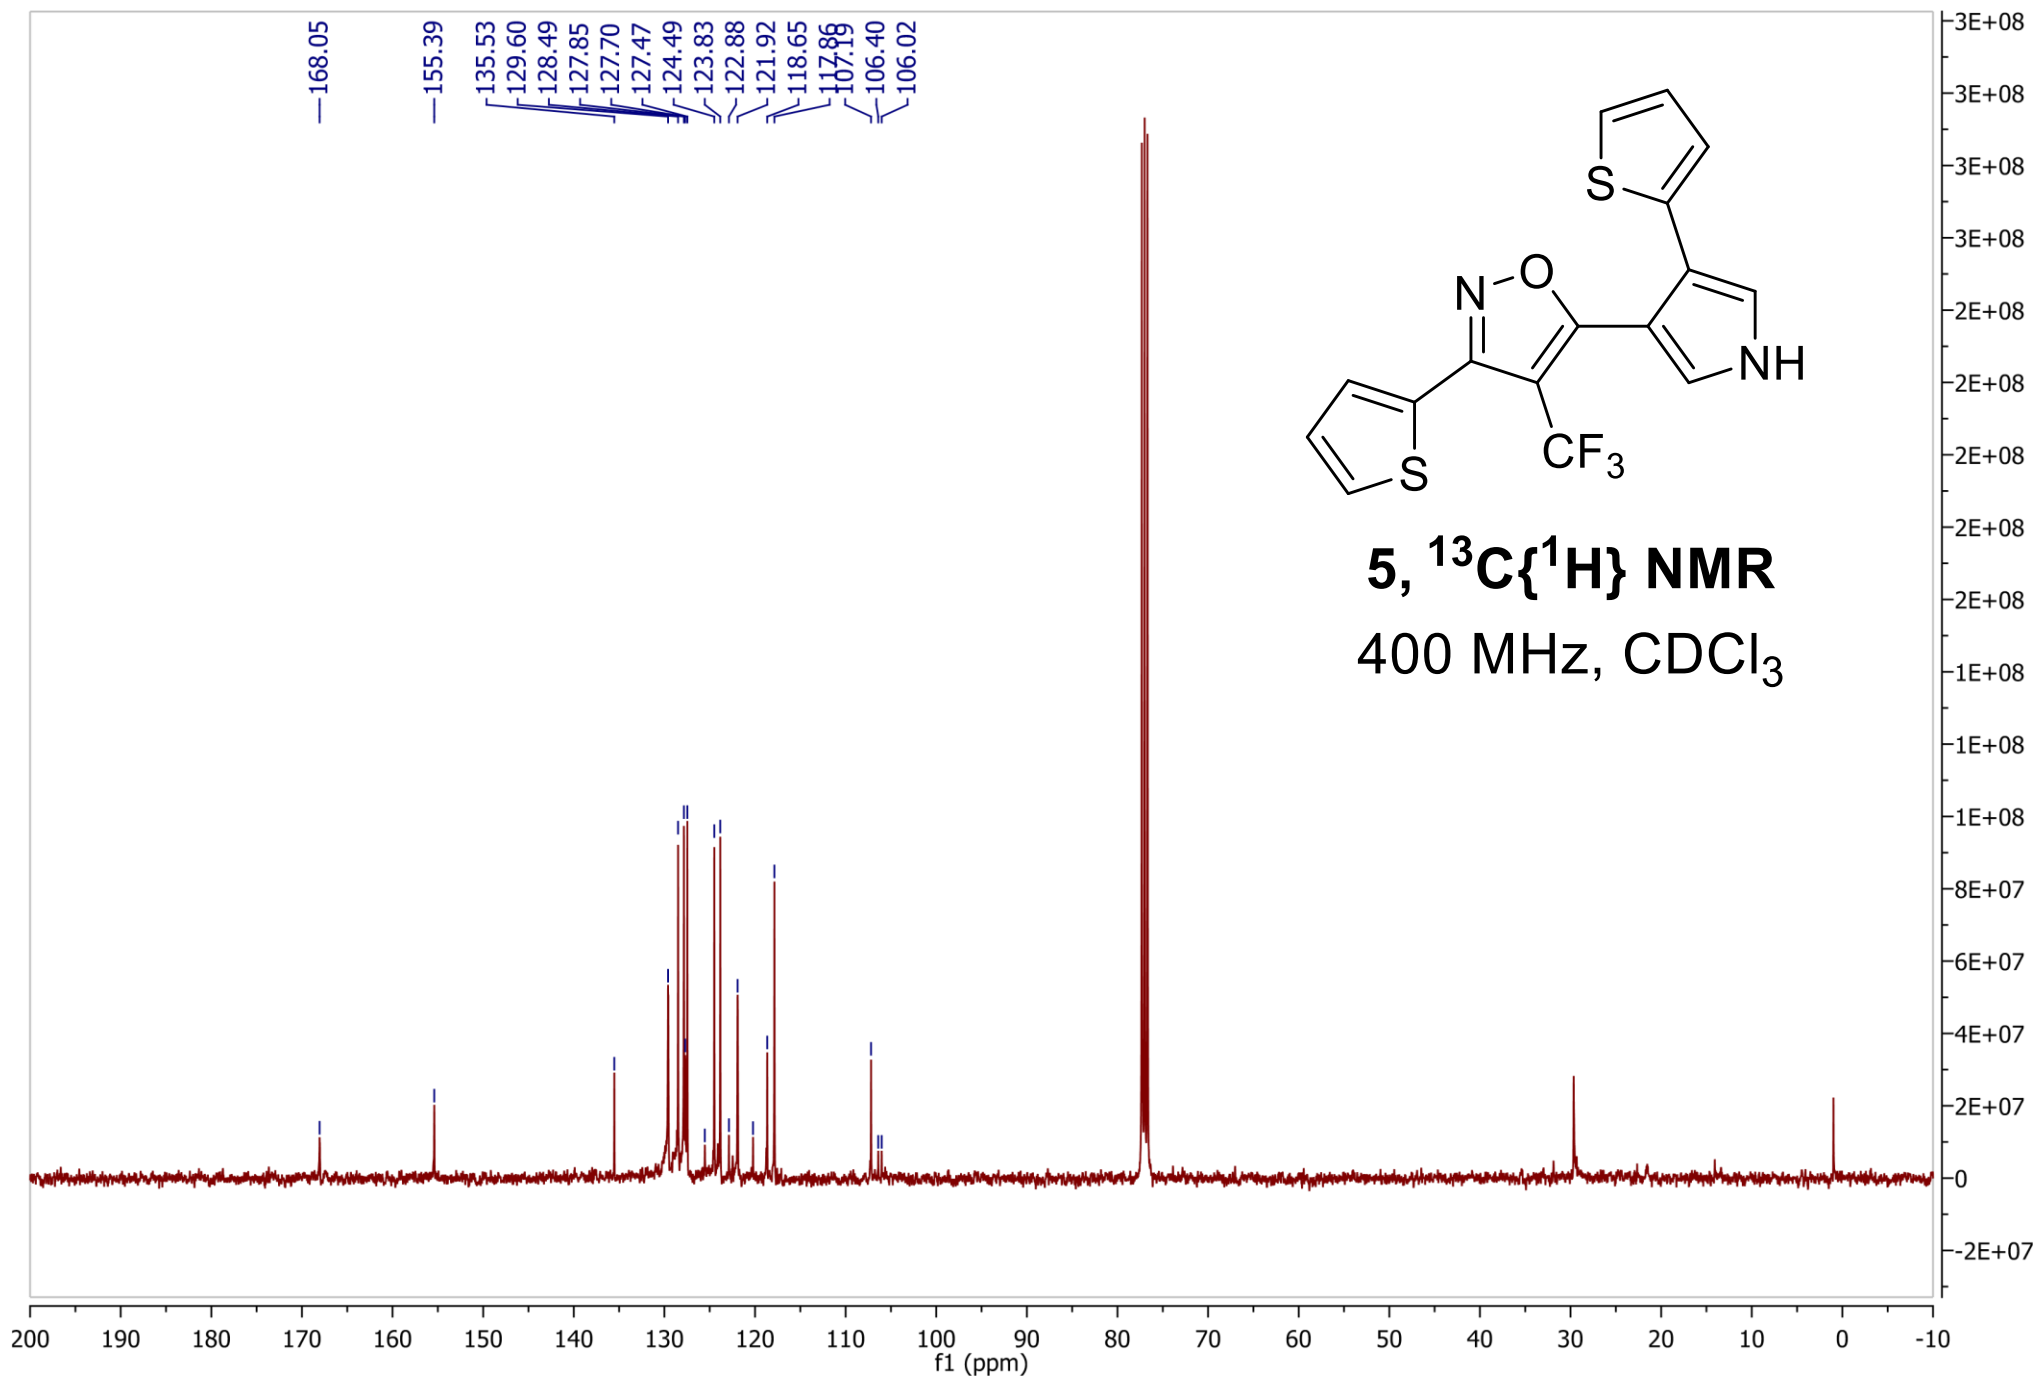

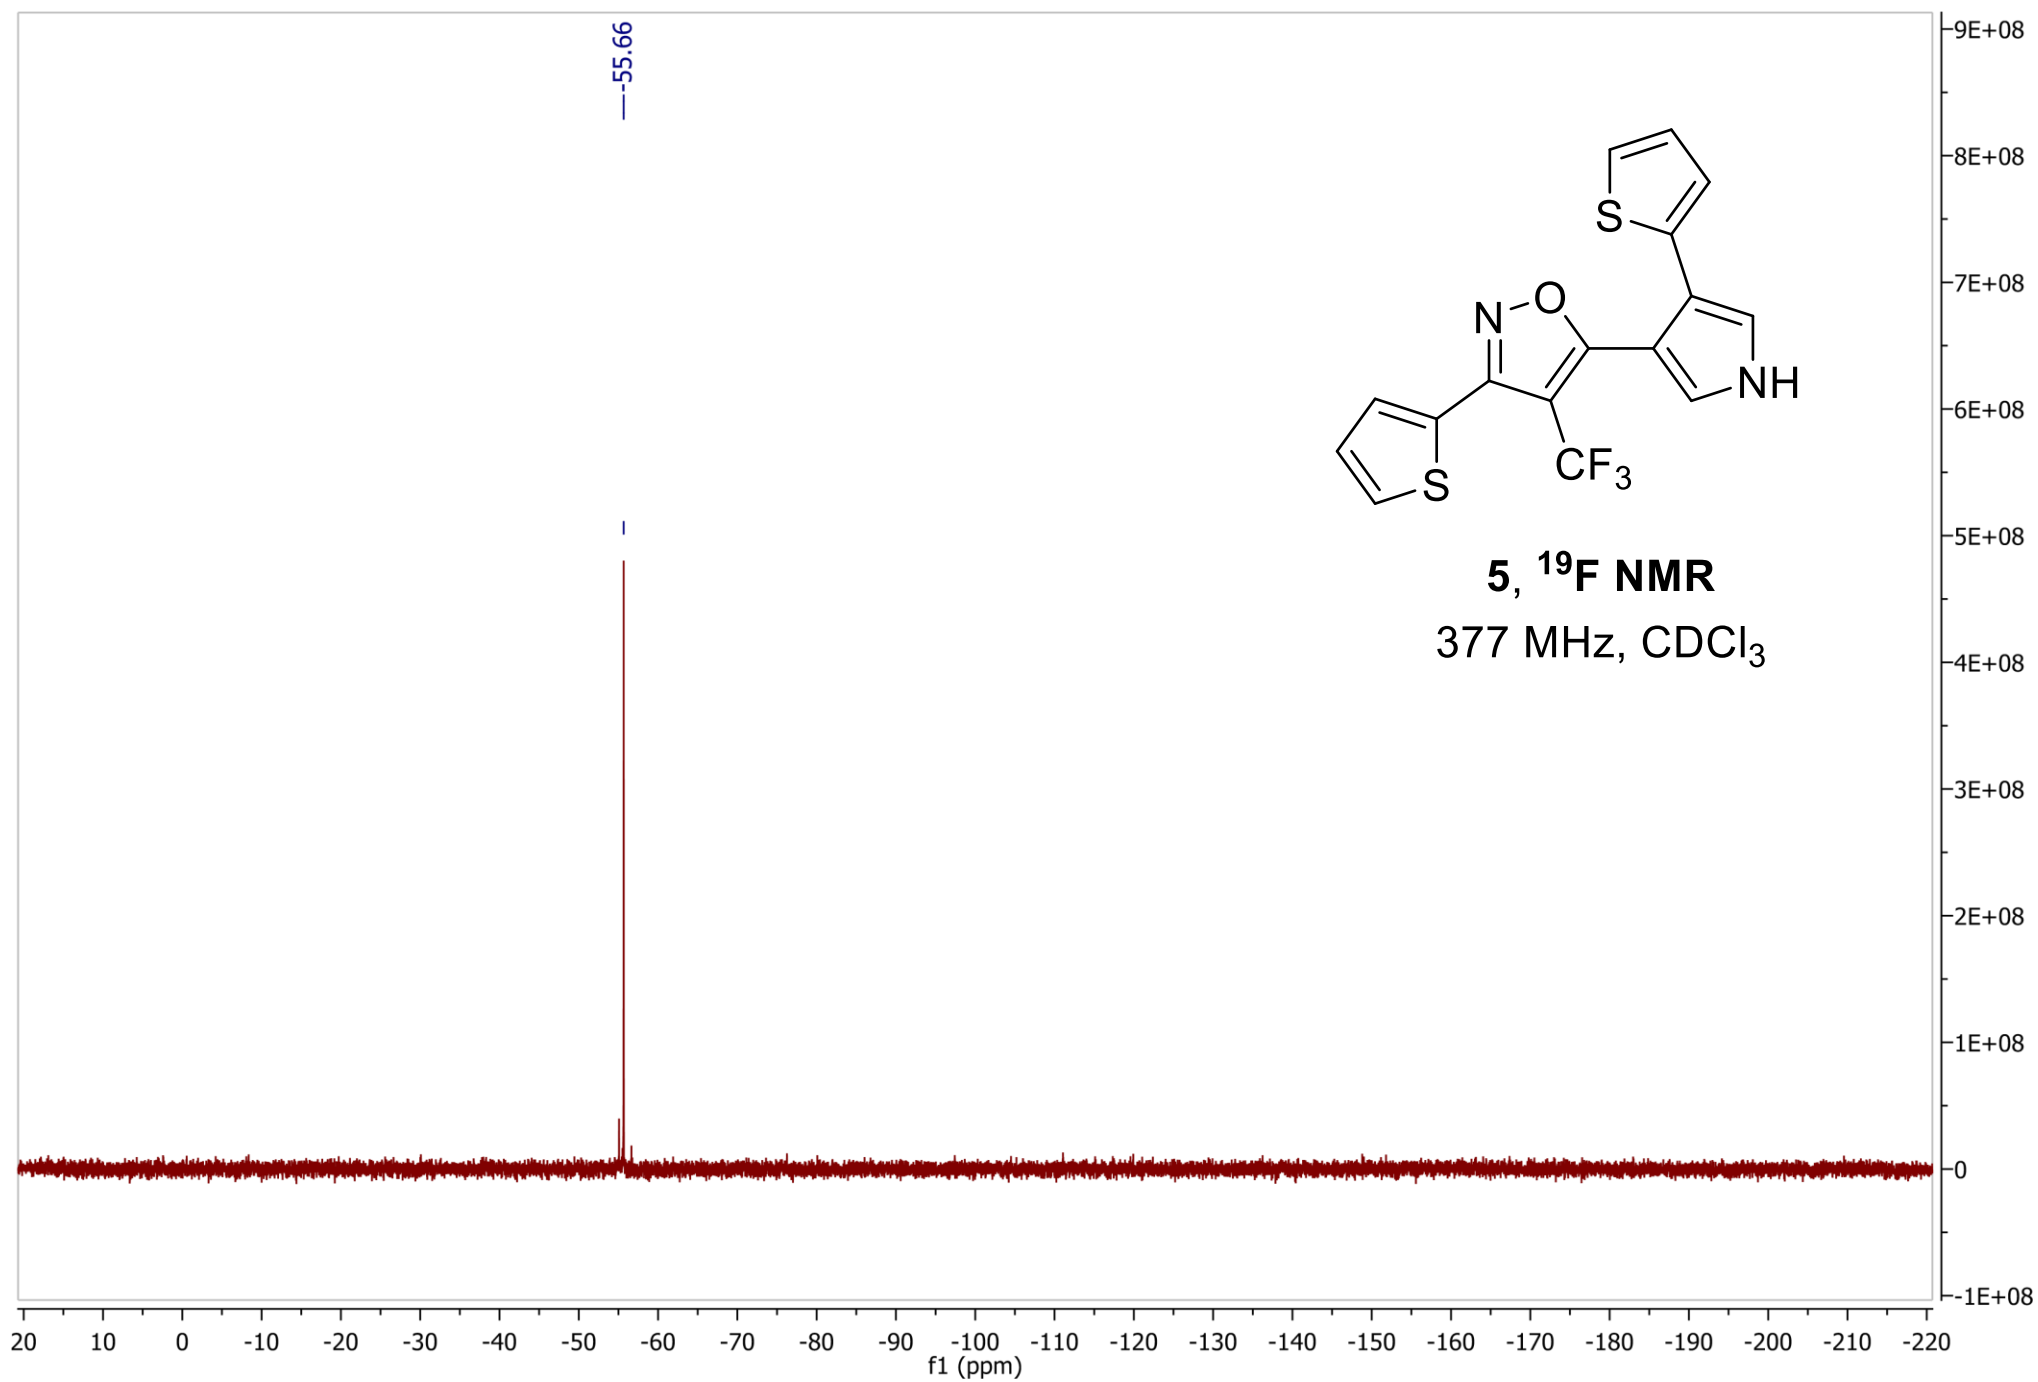



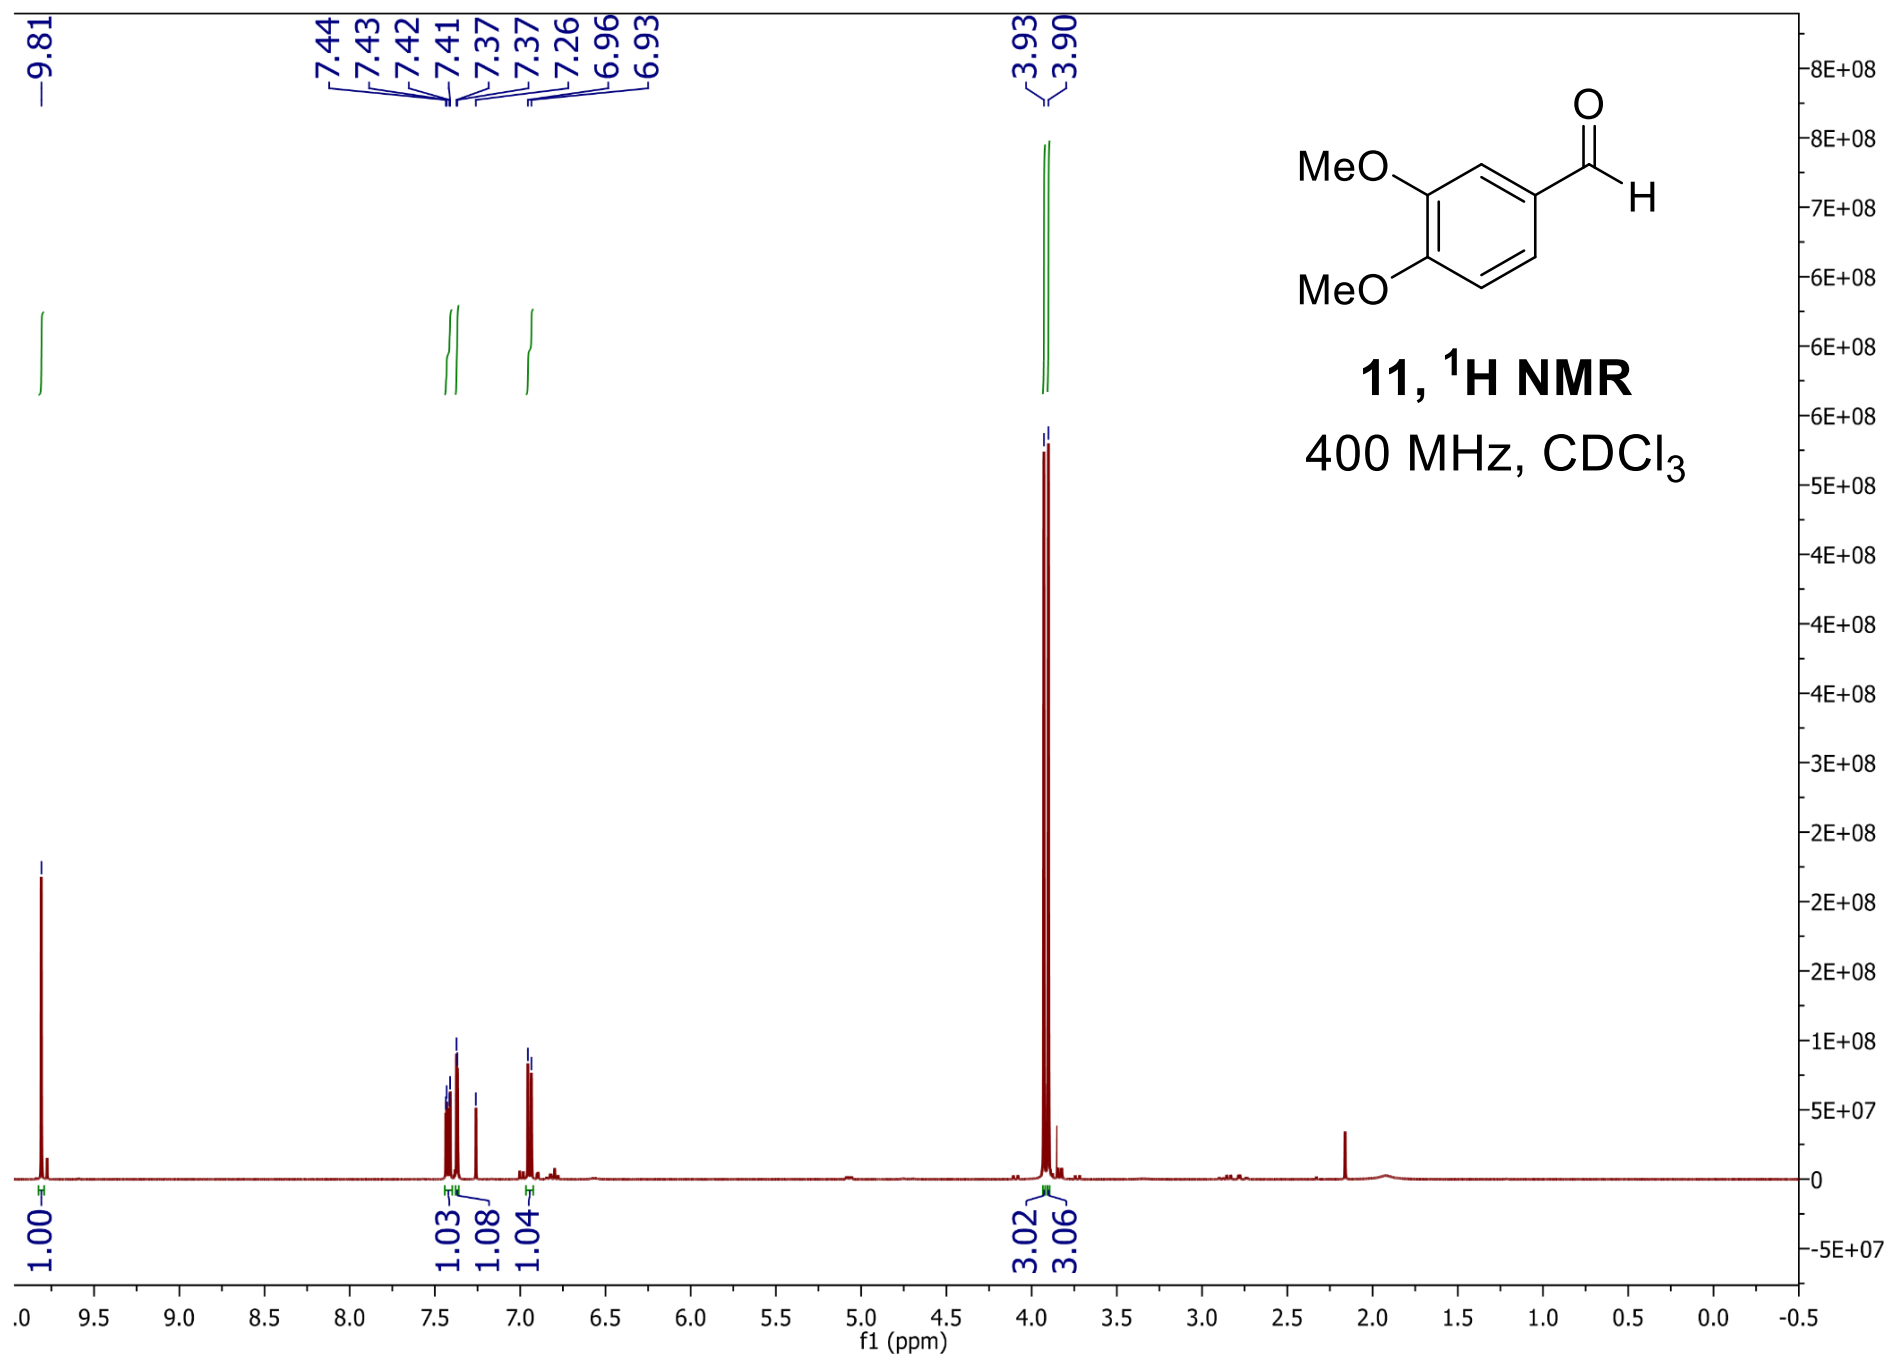

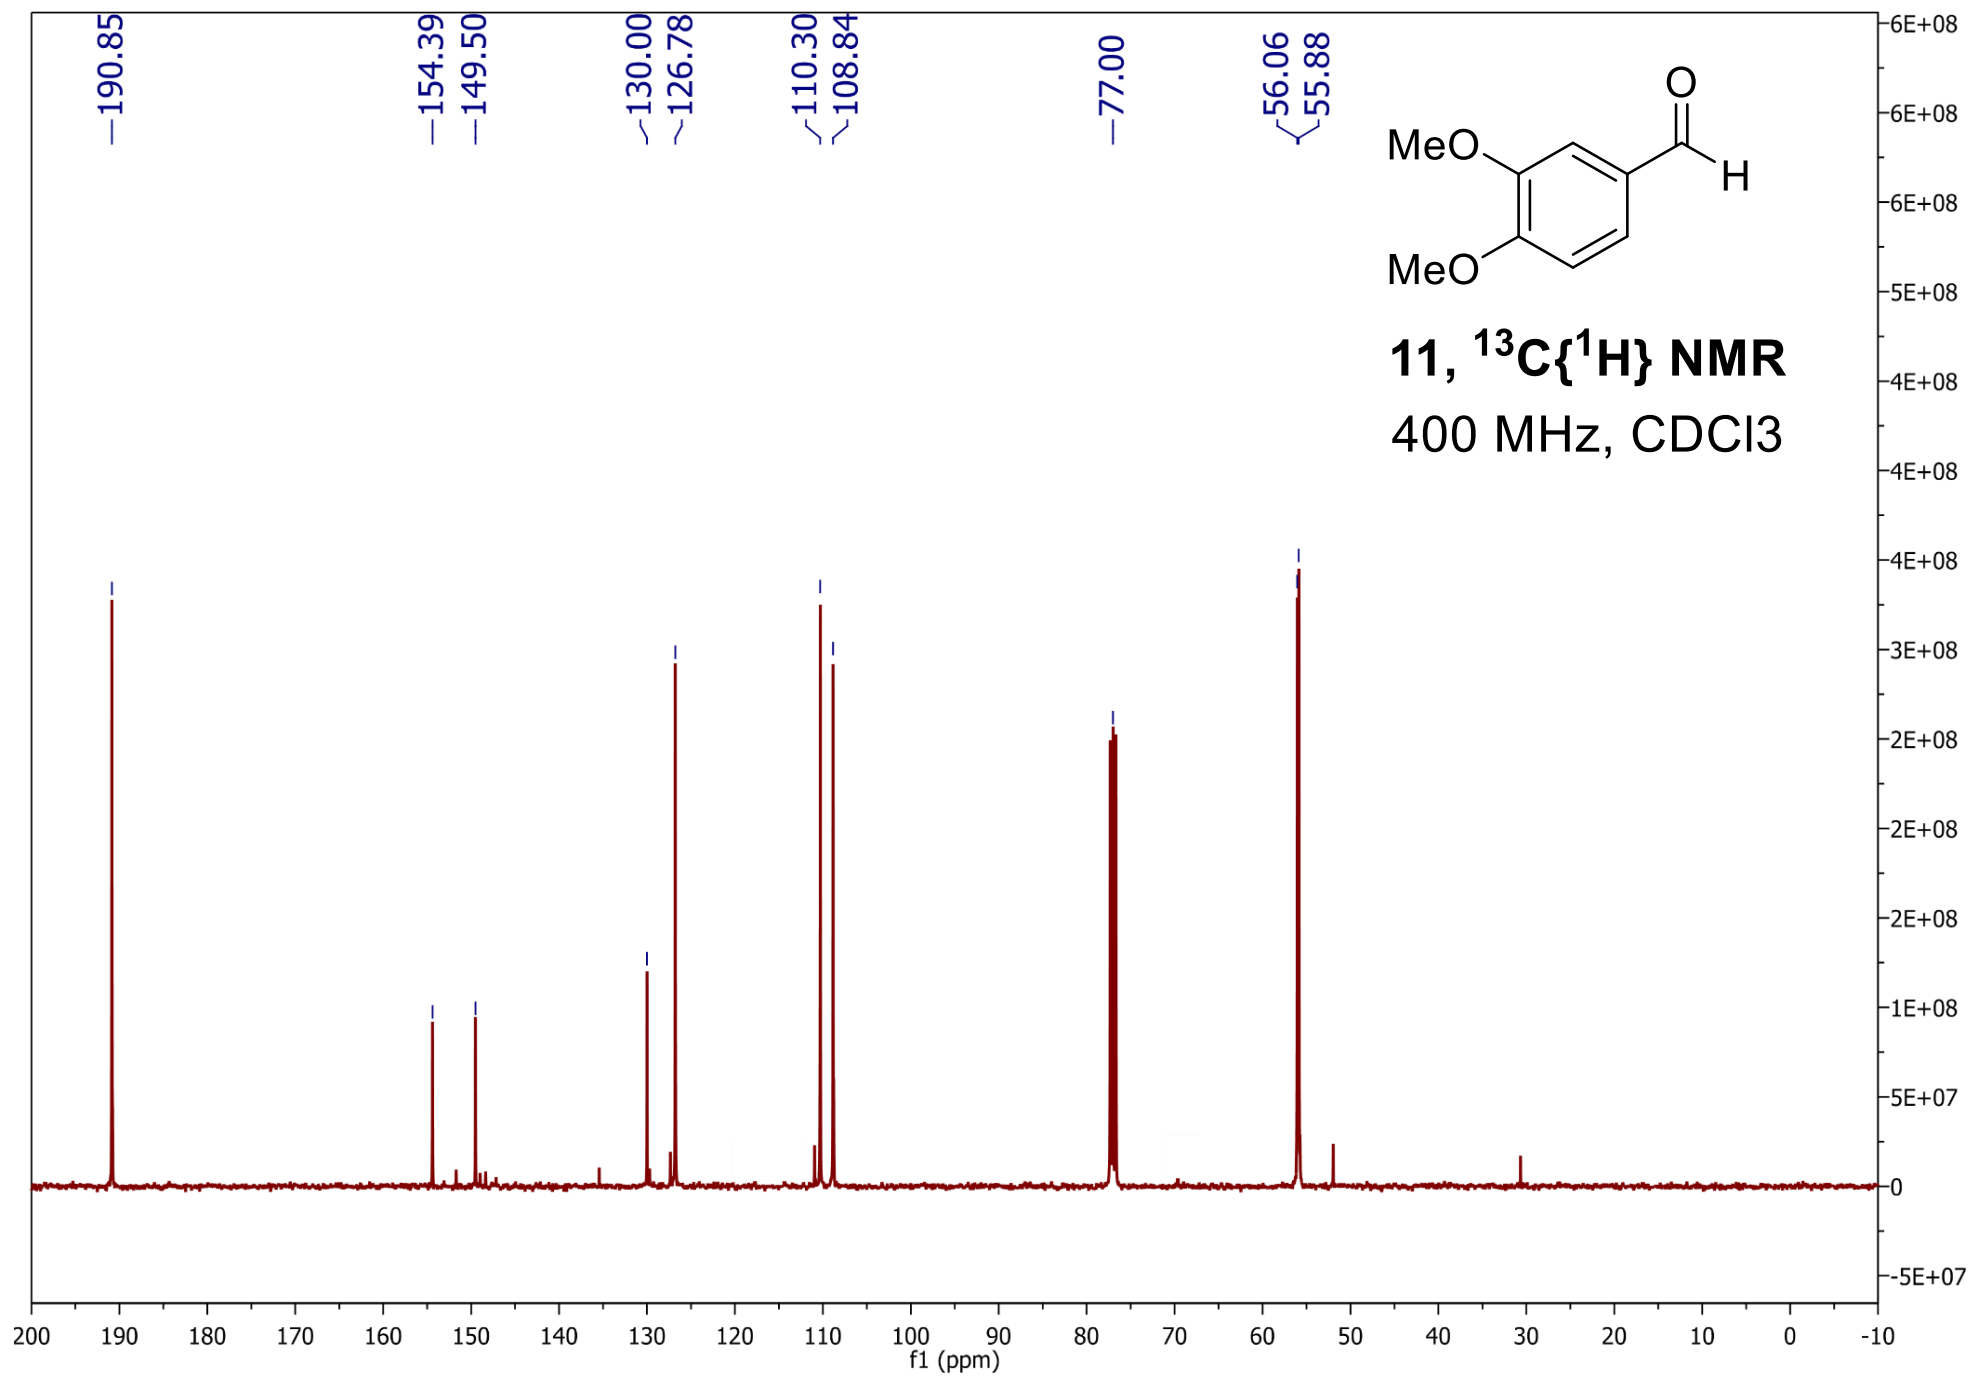

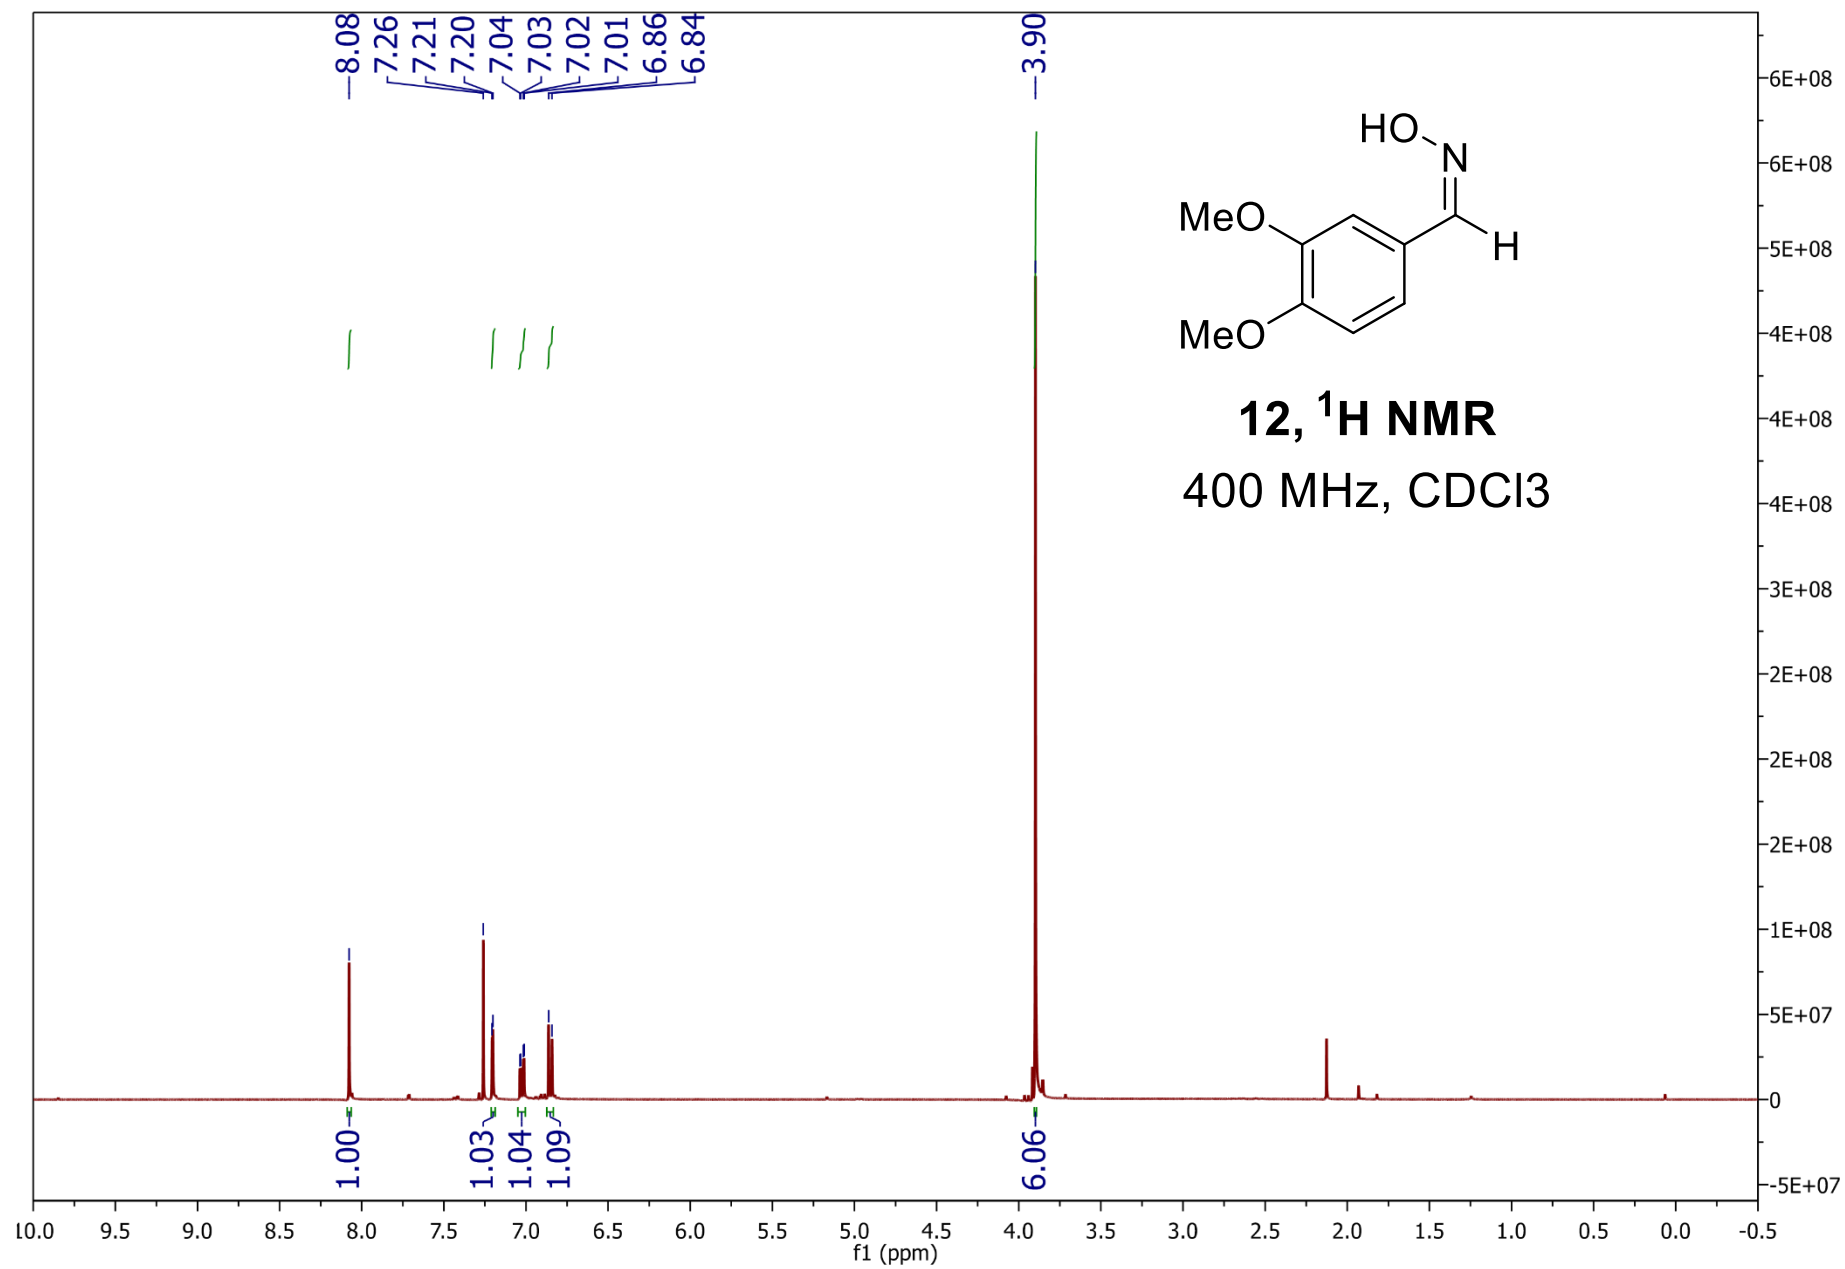

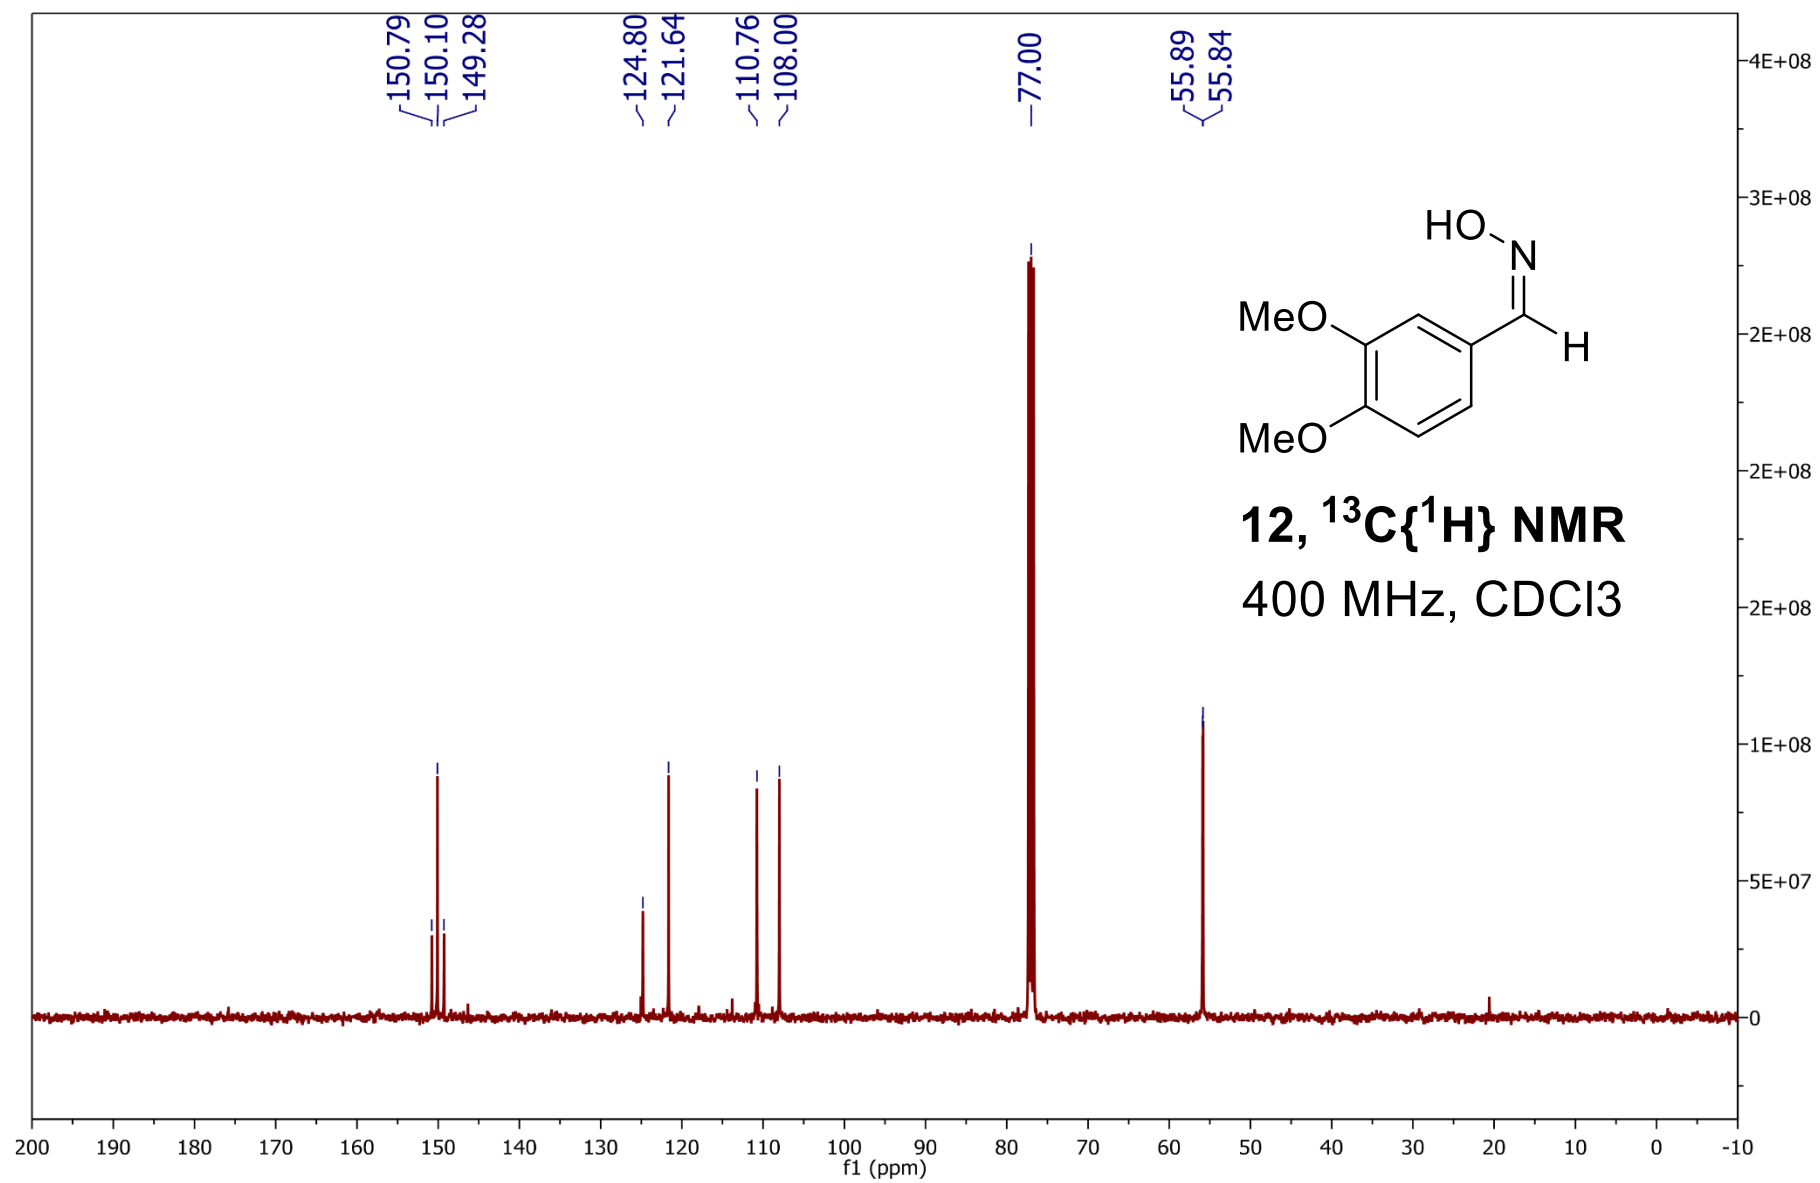

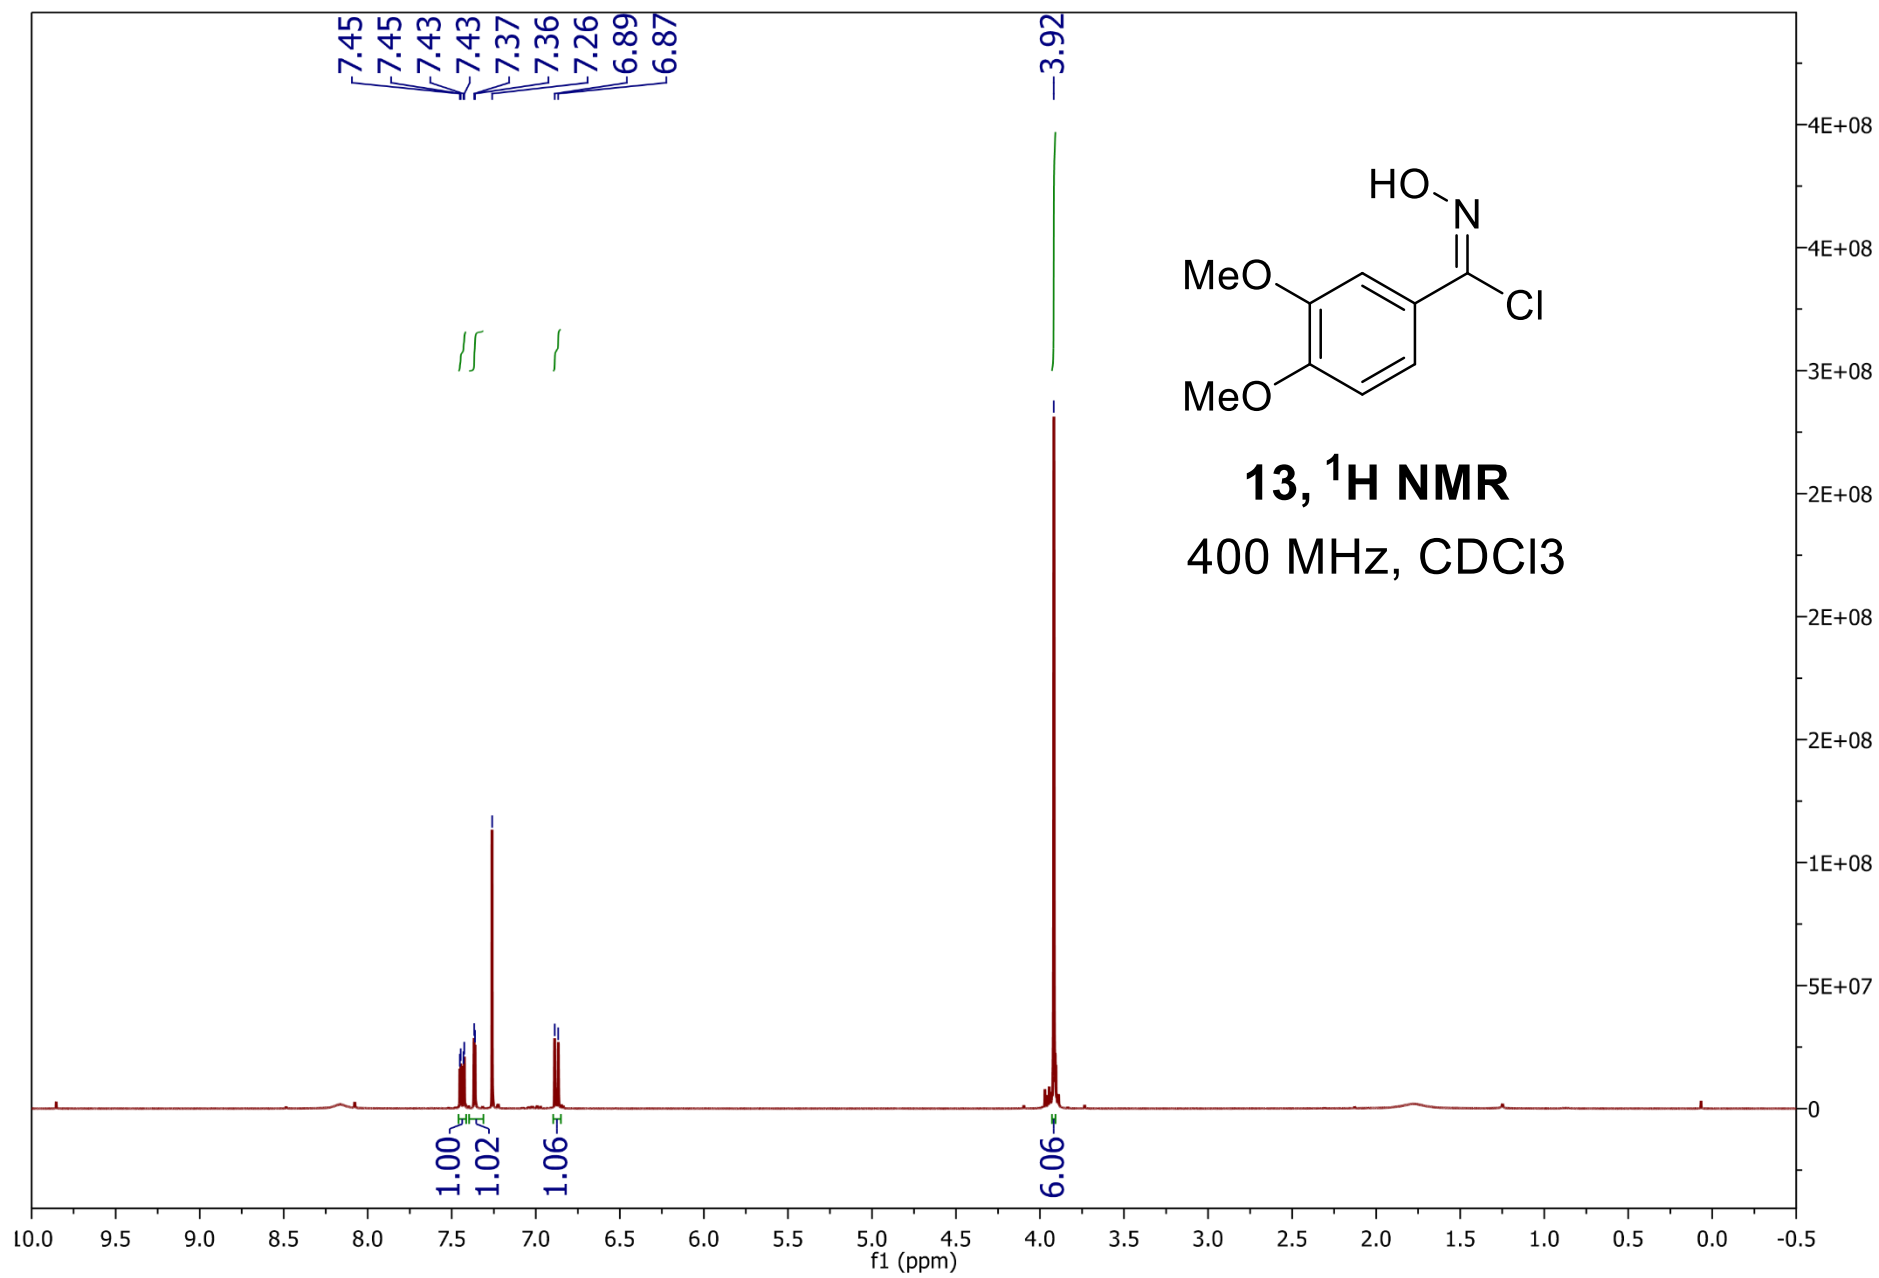

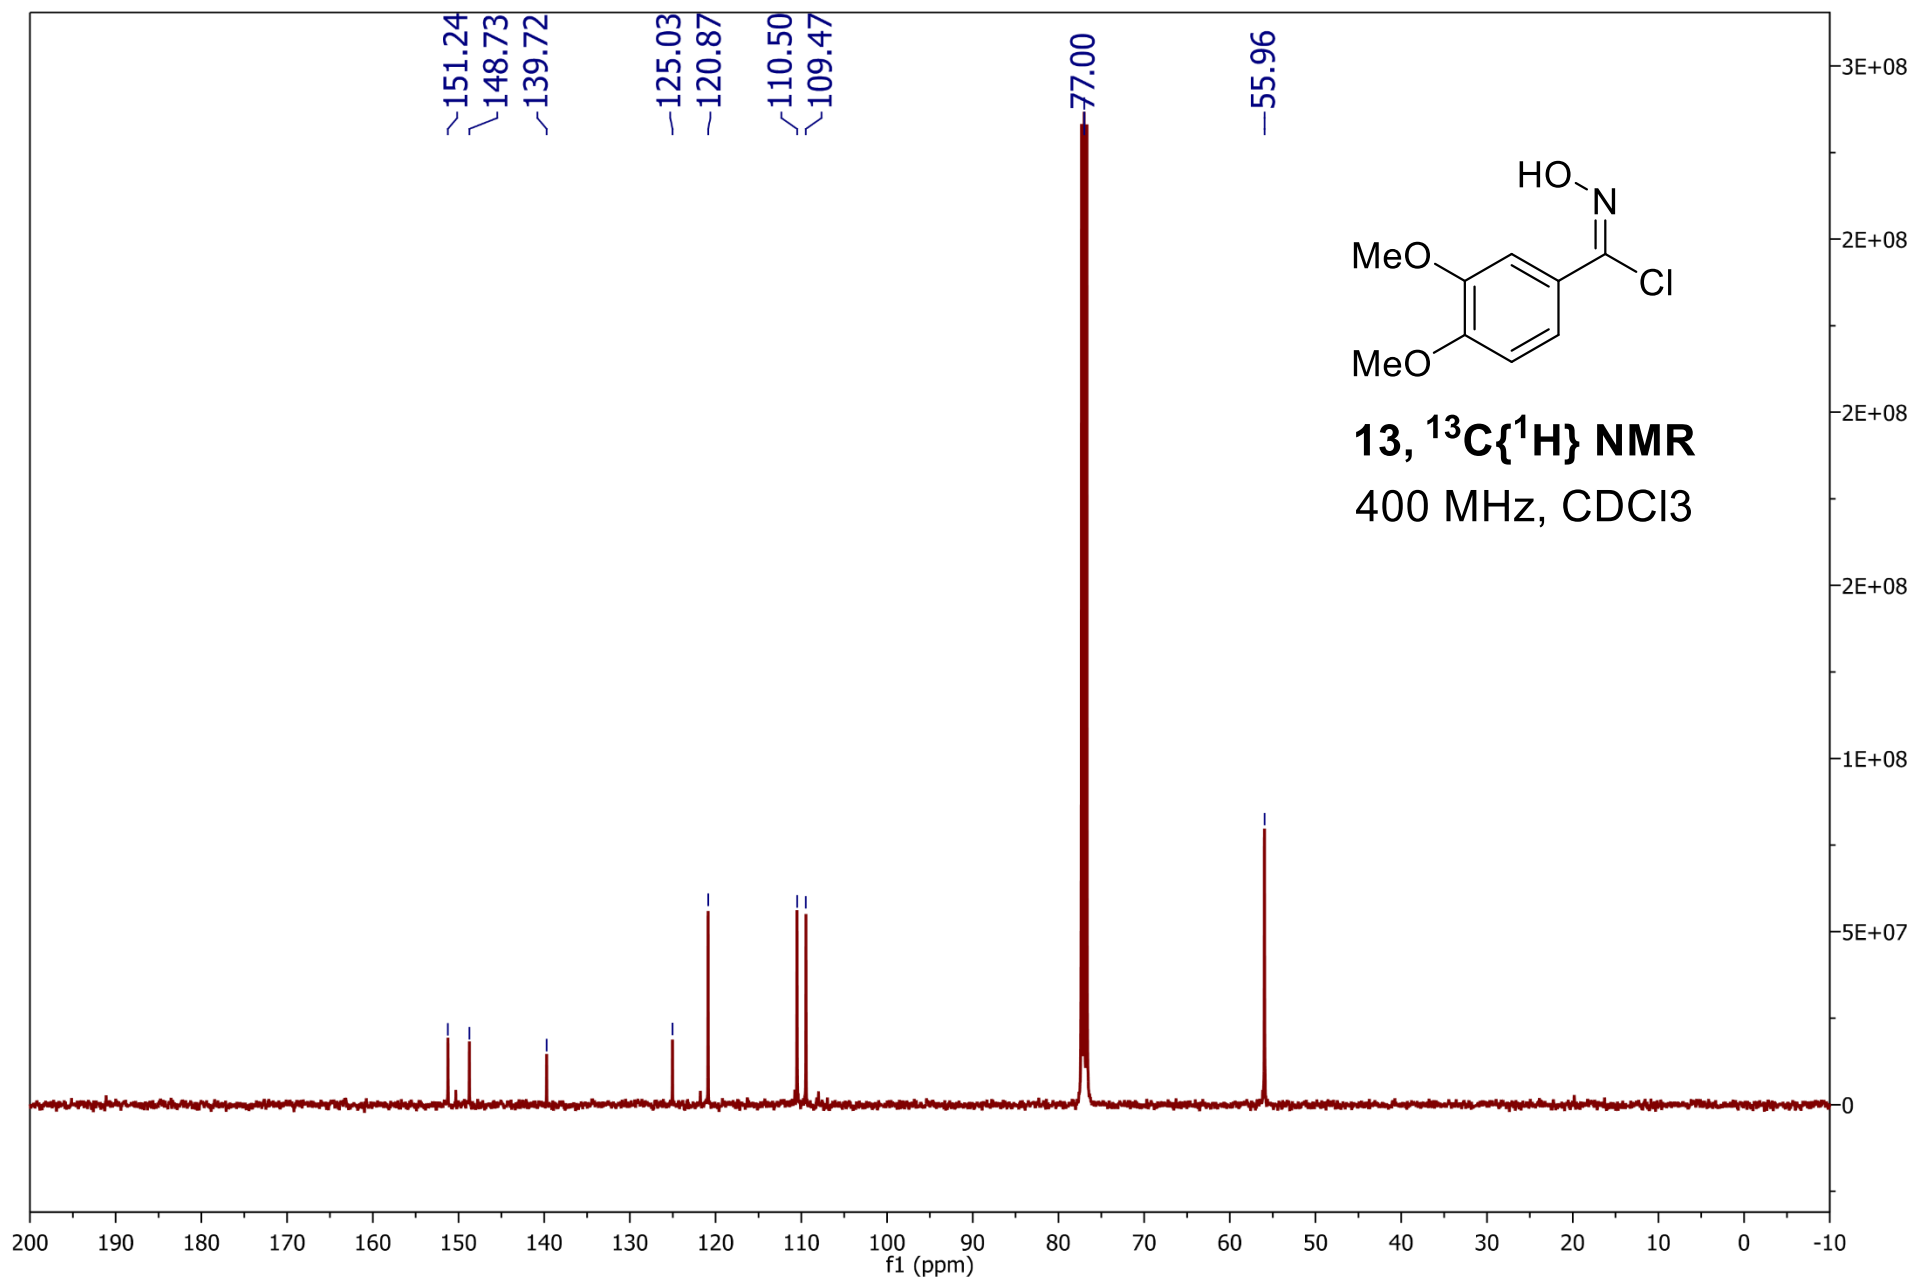

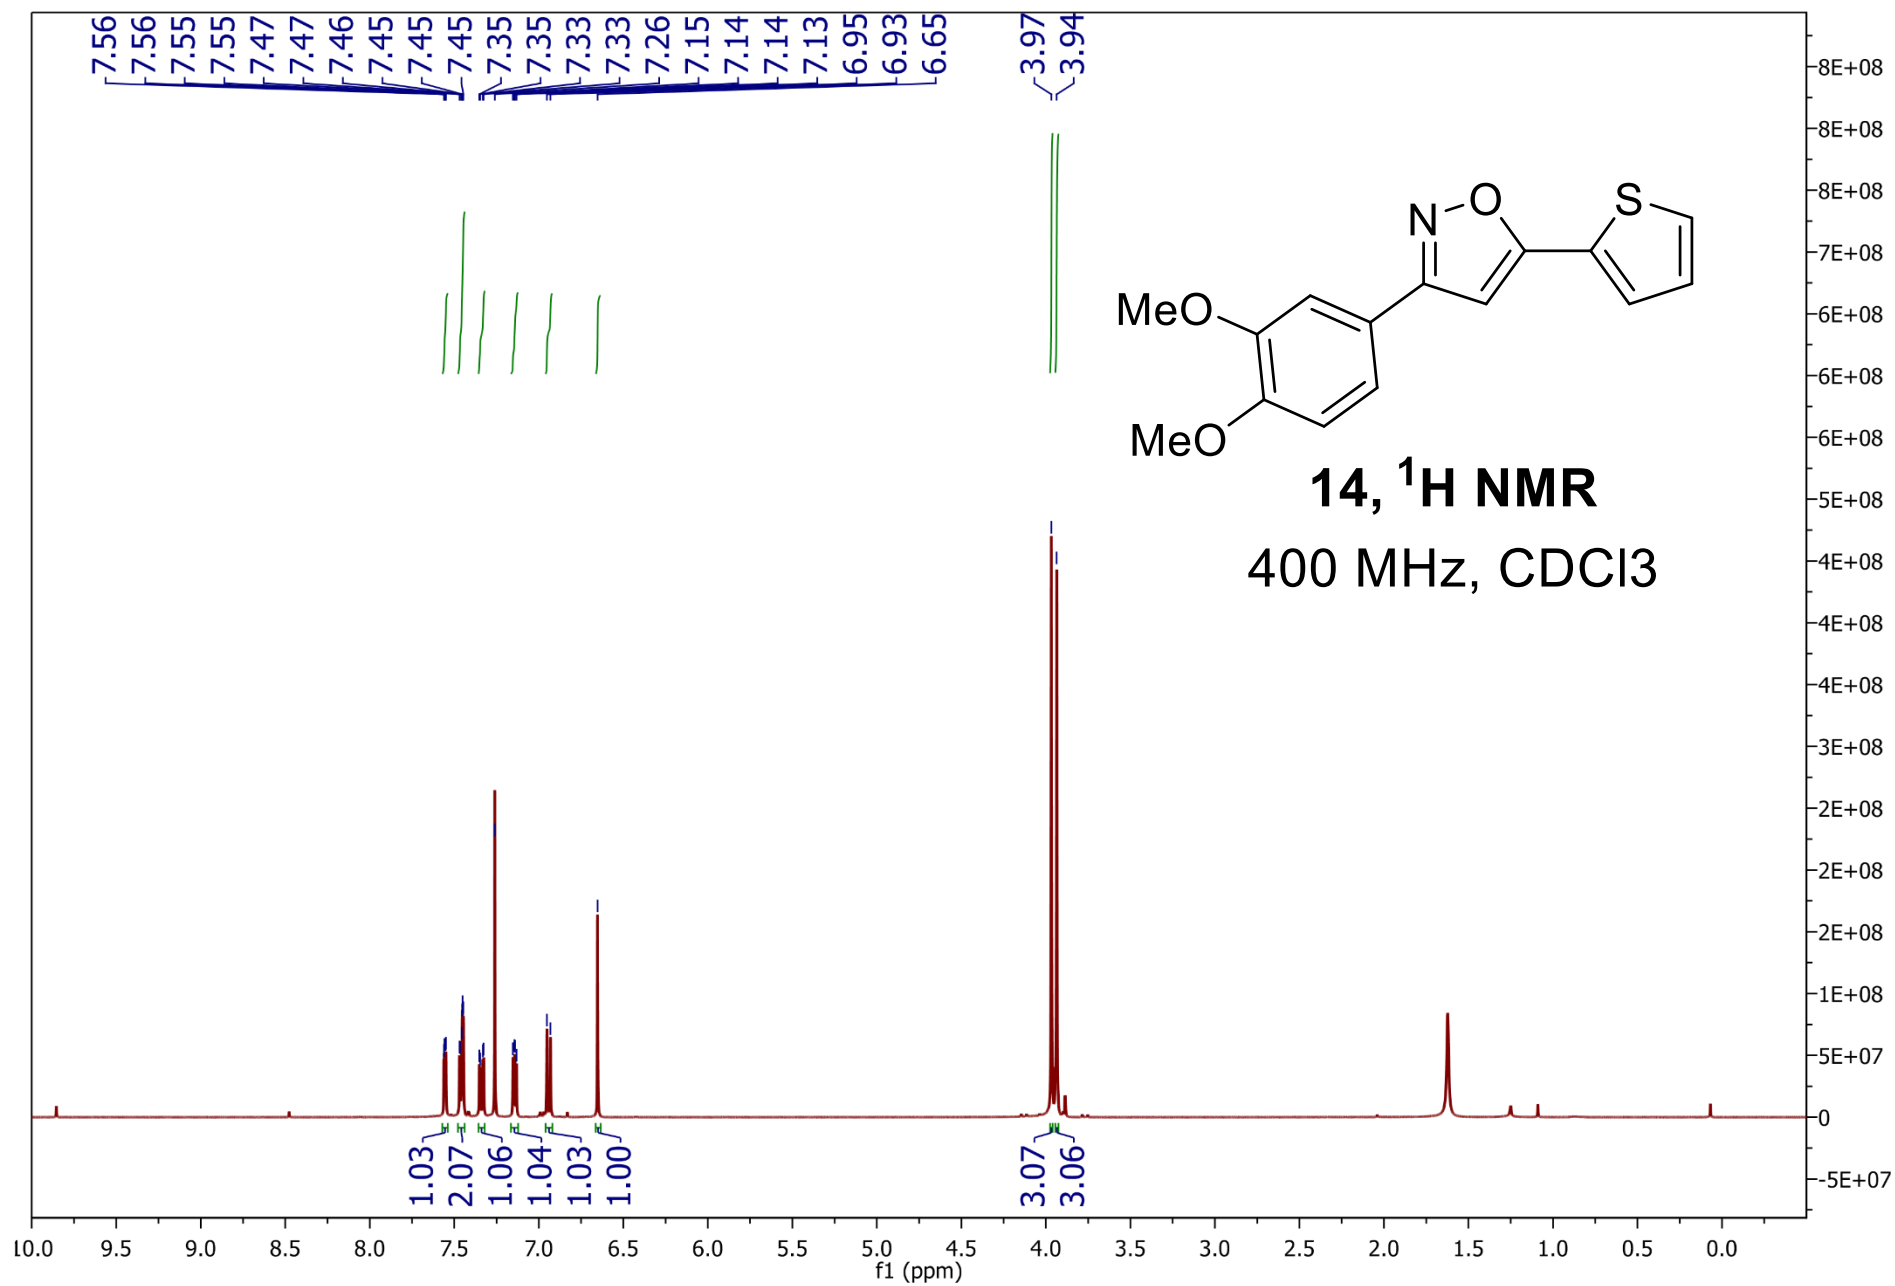

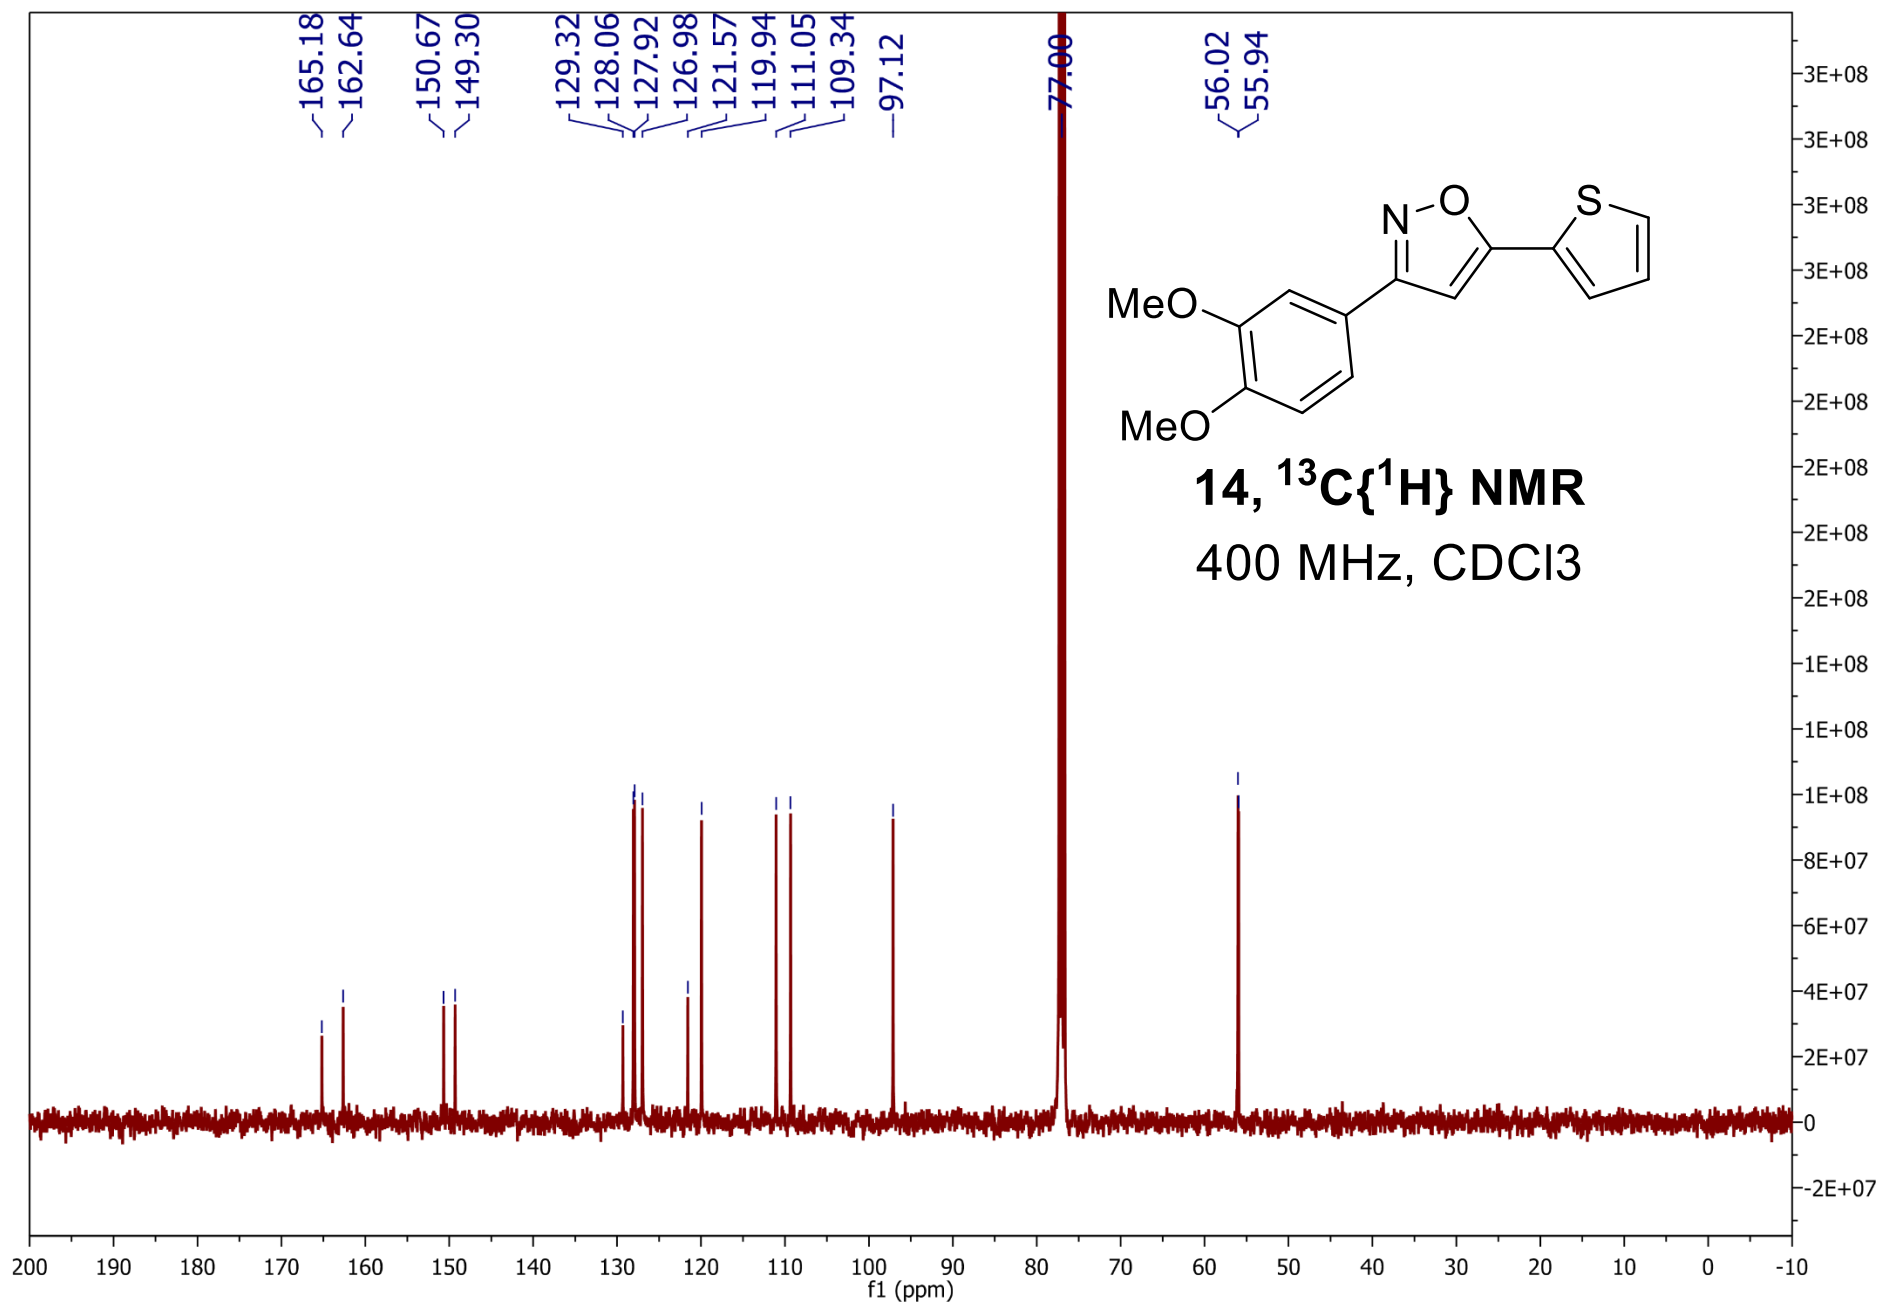



## 3. HRMS spectra of 2a-2g, 4

## Spectrum Plot Report

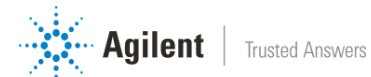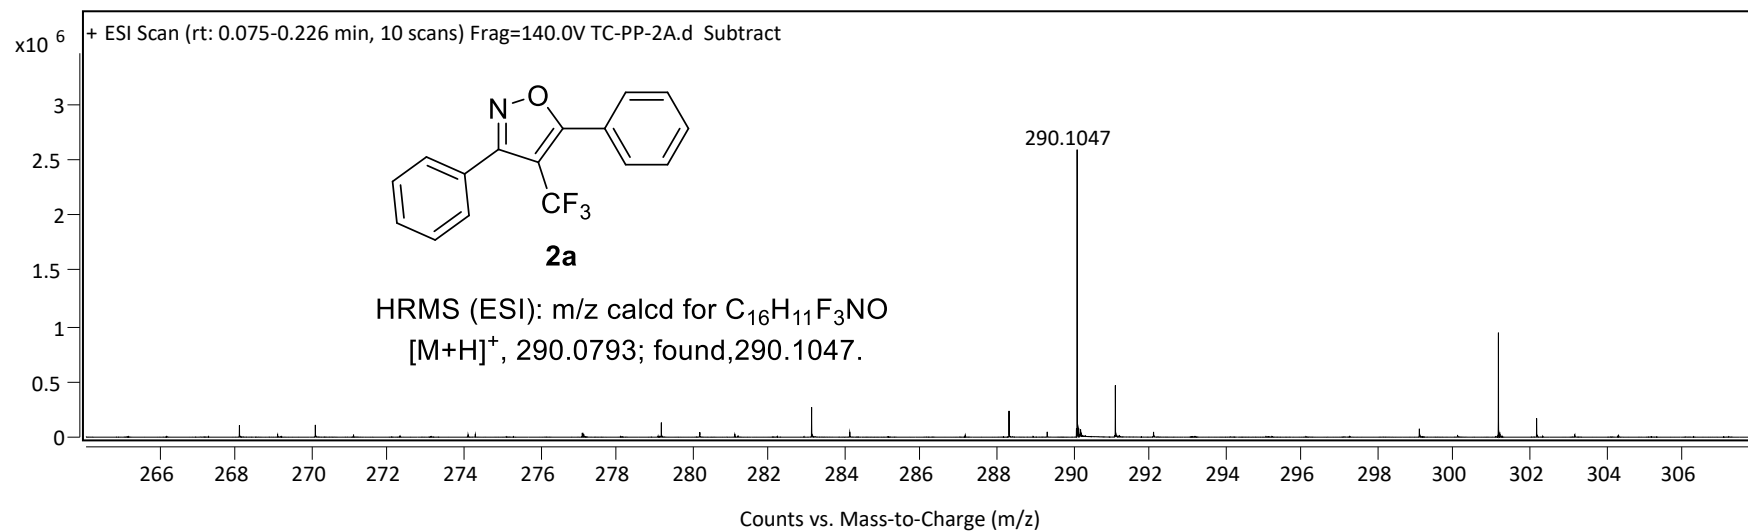

## Spectrum Plot Report

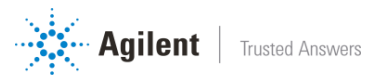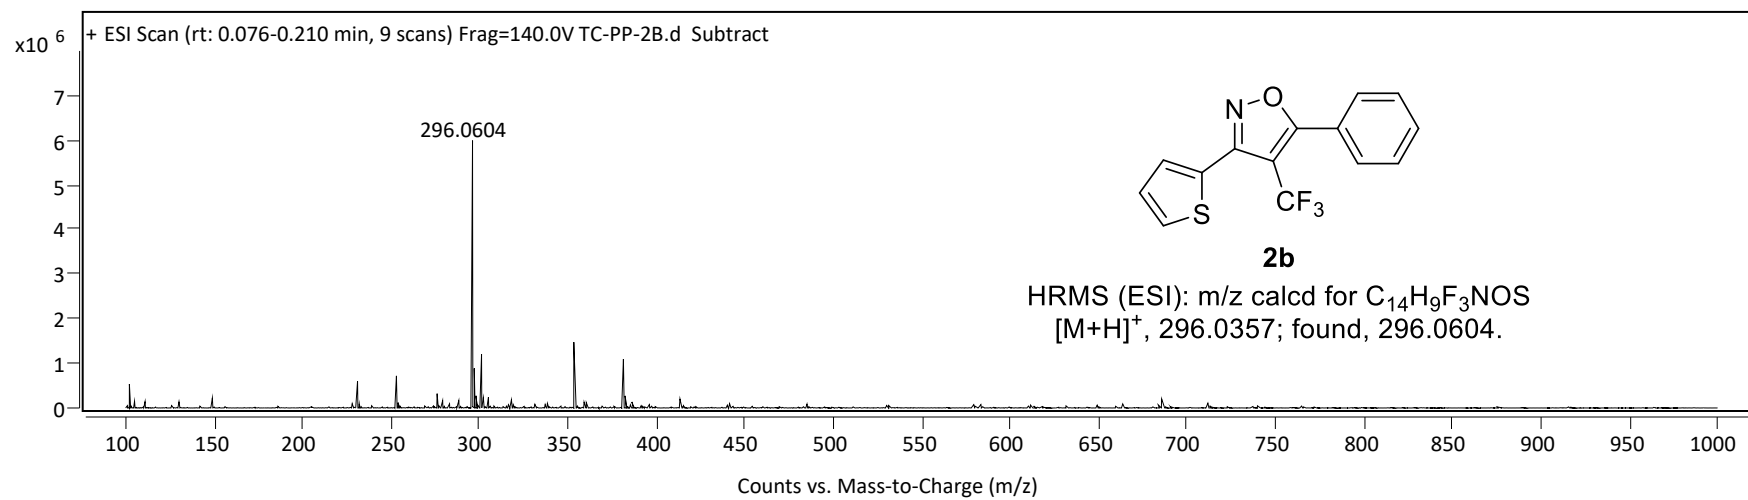

## Spectrum Plot Report

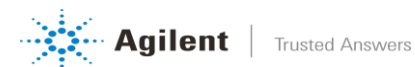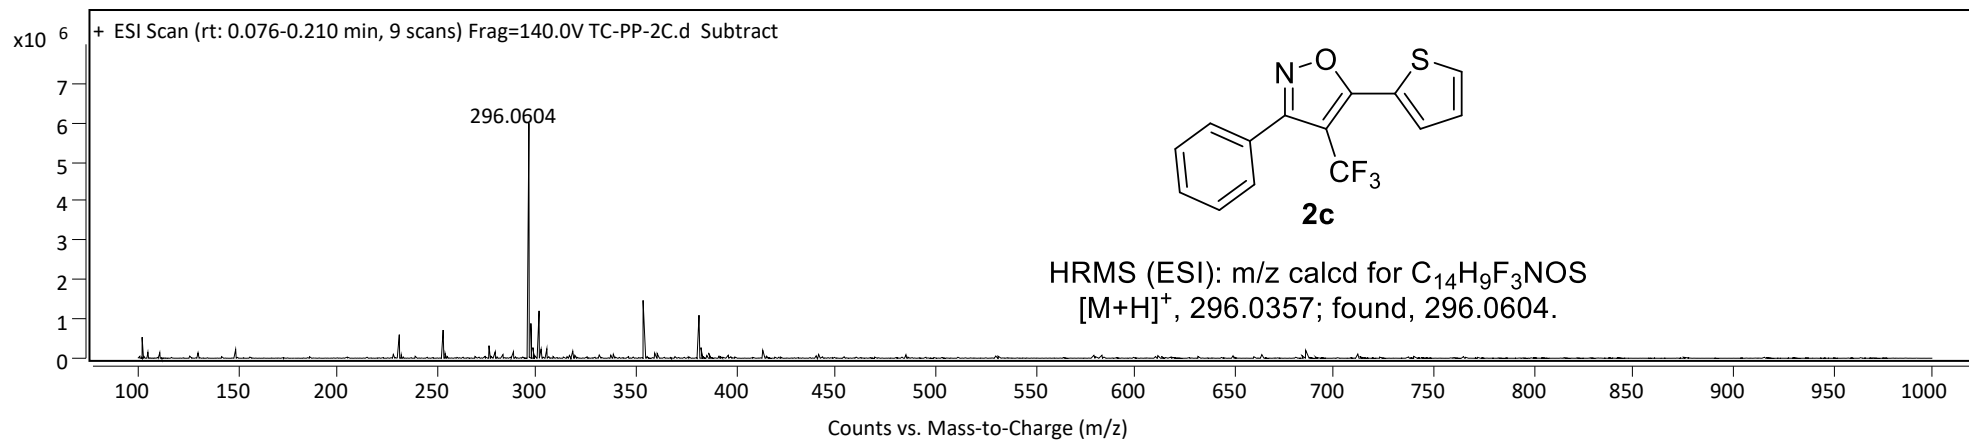

## Spectrum Plot Report

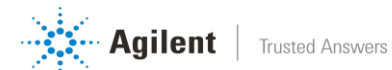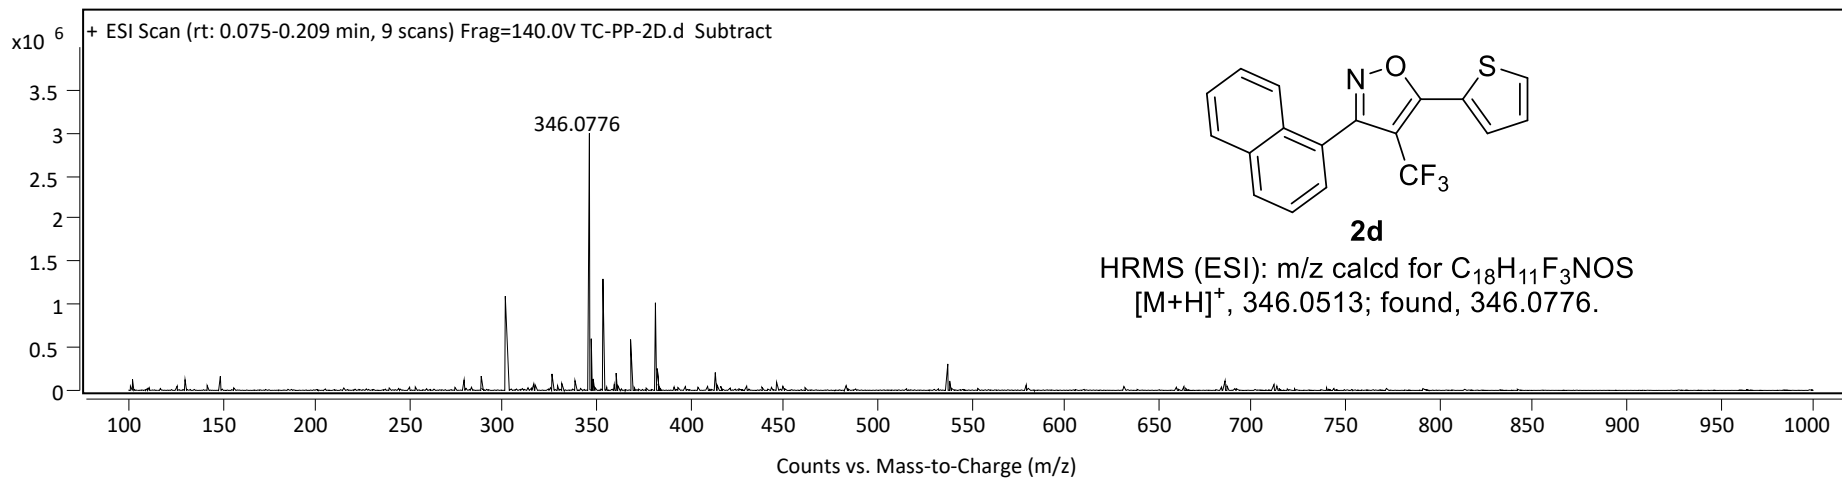

## Spectrum Plot Report

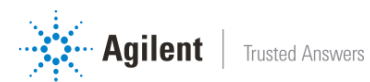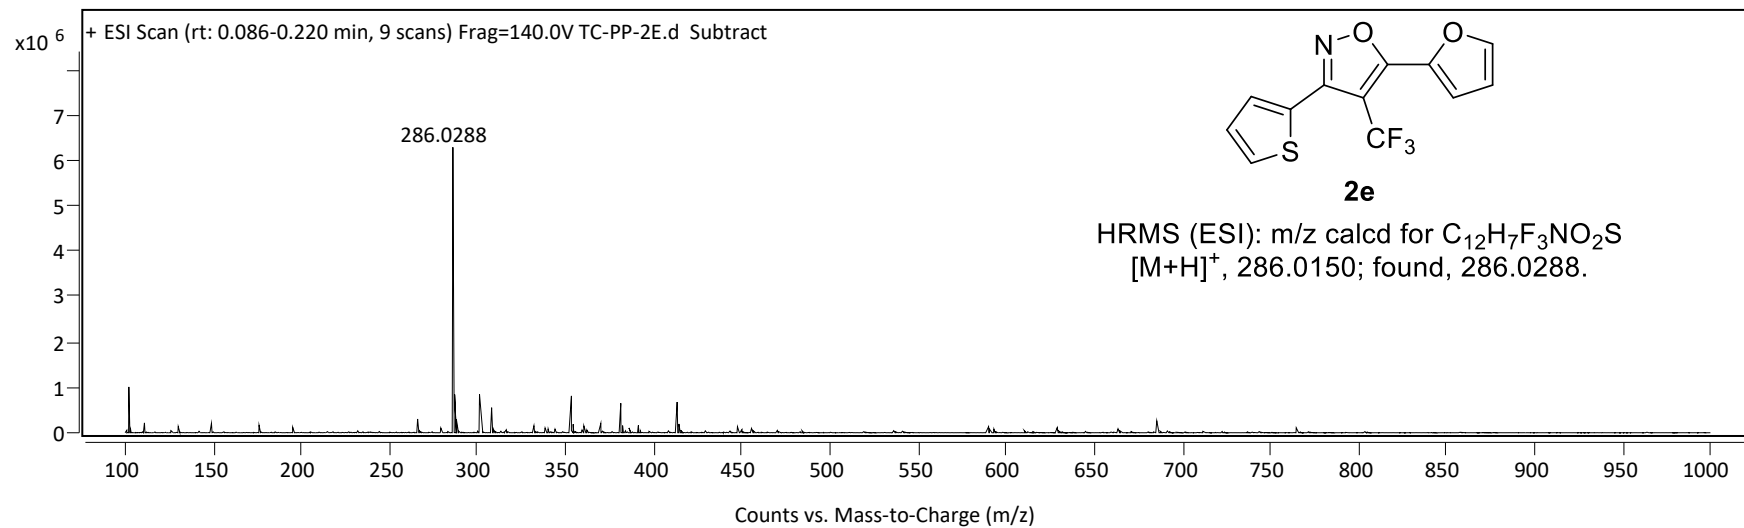

## Spectrum Plot Report

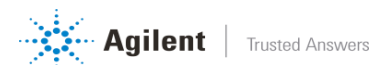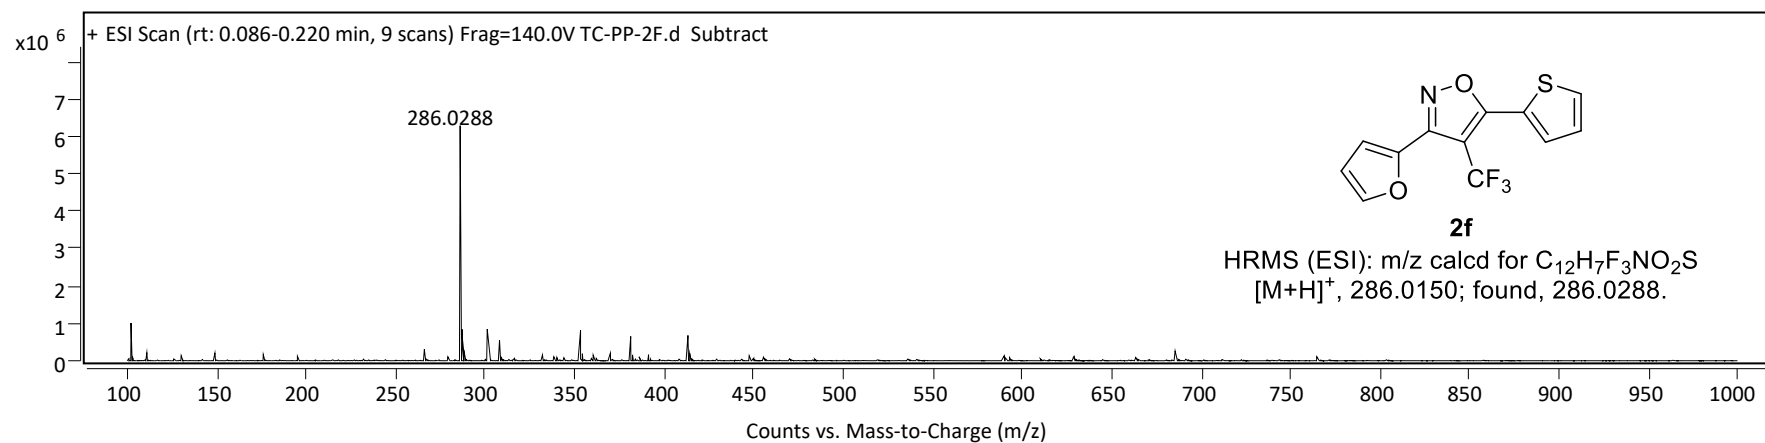

## Compound Spectra (overlaid)

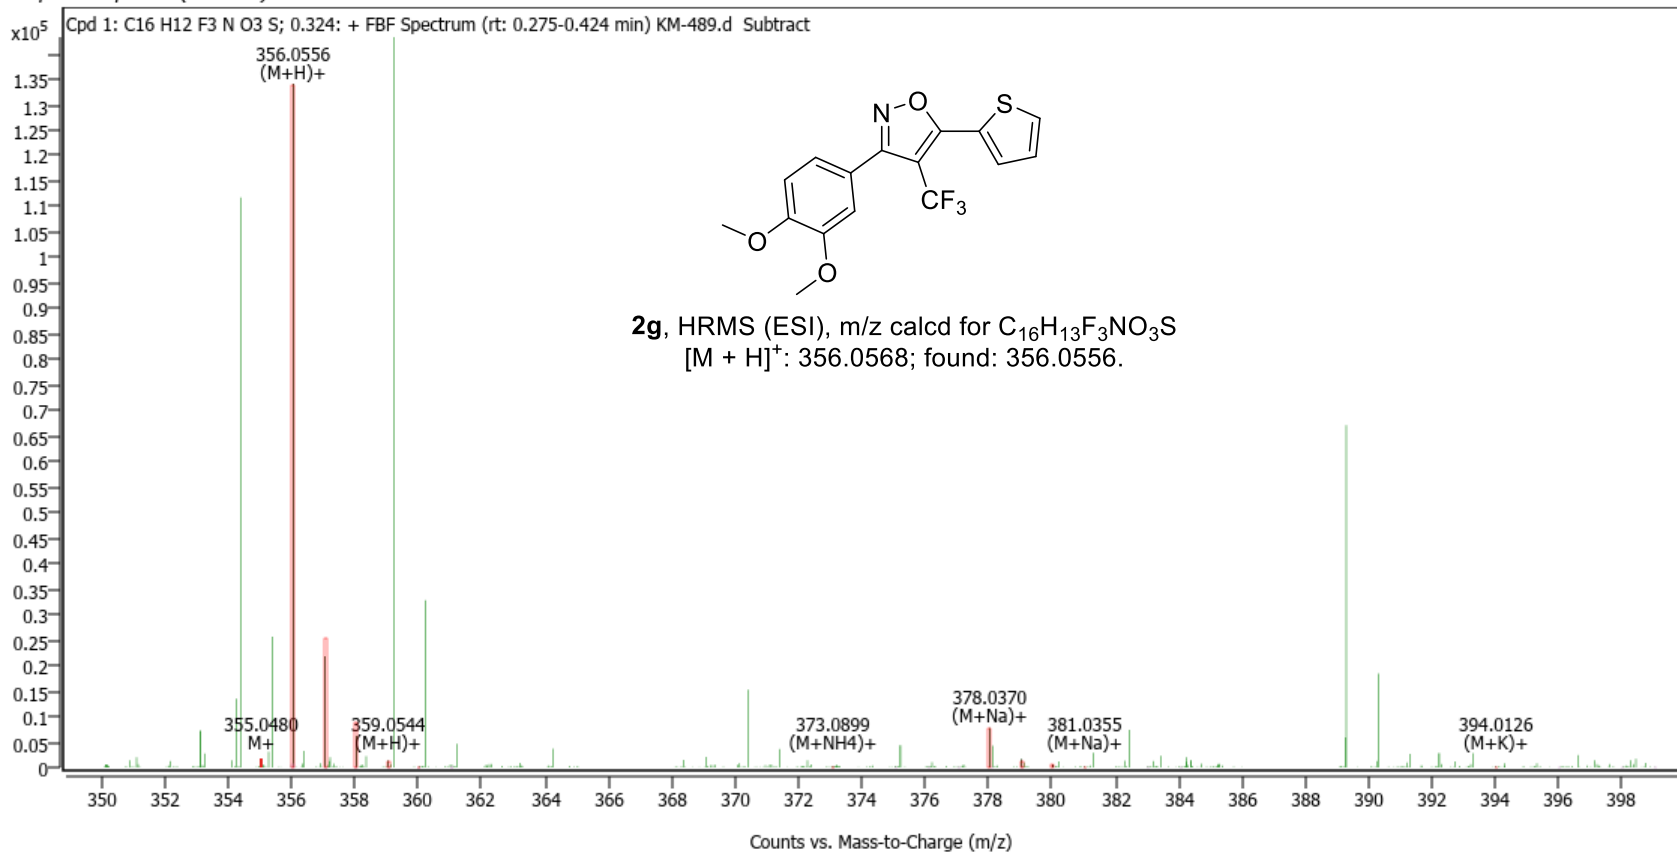

## Compound ID Table

| Cpd | Formula                                                                        | Mass (Tgt) | Calc. Mass | Mass     | Species                           | Diff(Tgt.ppm) | mDa   |
|-----|--------------------------------------------------------------------------------|------------|------------|----------|-----------------------------------|---------------|-------|
| 1   | C <sub>16</sub> H <sub>12</sub> F <sub>3</sub> N <sub>1</sub> O <sub>3</sub> S | 355.0490   | 355.0482   | 355.0480 | M+ (M+H) <sup>+</sup>             | -2.16         | -0.77 |
|     |                                                                                |            |            | 356.0556 | (M+NH <sub>4</sub> ) <sup>+</sup> |               |       |
|     |                                                                                |            |            | 373.0899 | (M+Na) <sup>+</sup>               |               |       |
|     |                                                                                |            |            | 378.0370 | (M+K) <sup>+</sup>                |               |       |
|     |                                                                                |            |            | 394.0126 |                                   |               |       |
|     |                                                                                |            |            |          |                                   |               |       |

## Spectrum Plot Report

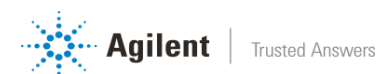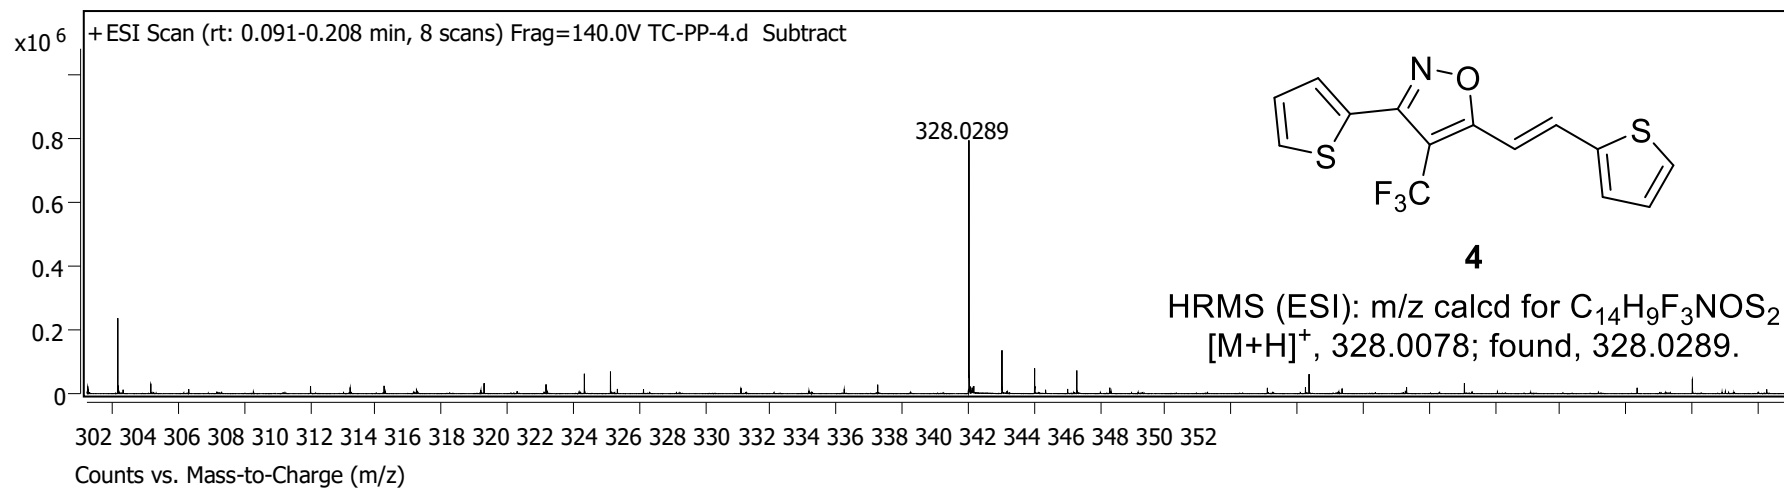

## Spectrum Plot Report

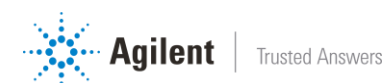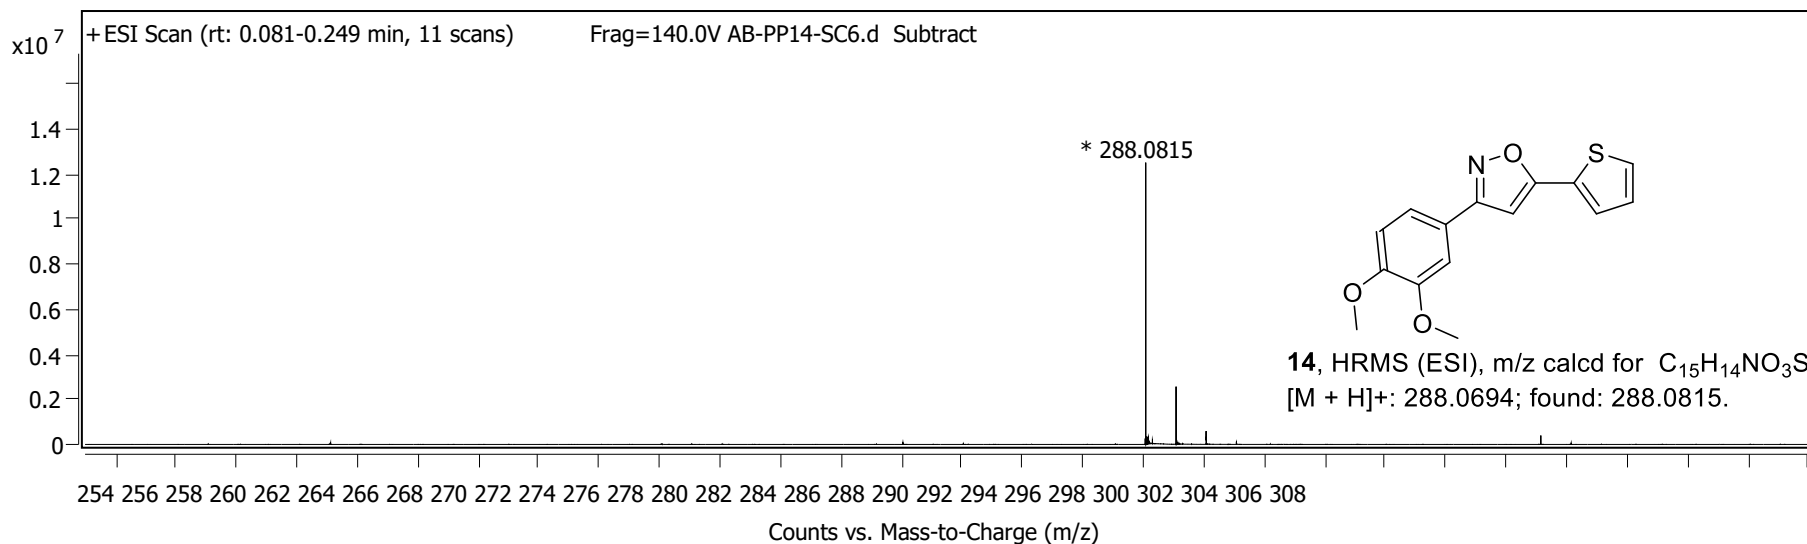

GS 6 83 126 (2.304) AM2 (Ar,20000.0,556.28,0.00,LS 3); Sm (SG, 3x1.00)

1: TOF MS ES+

100

7.38e4

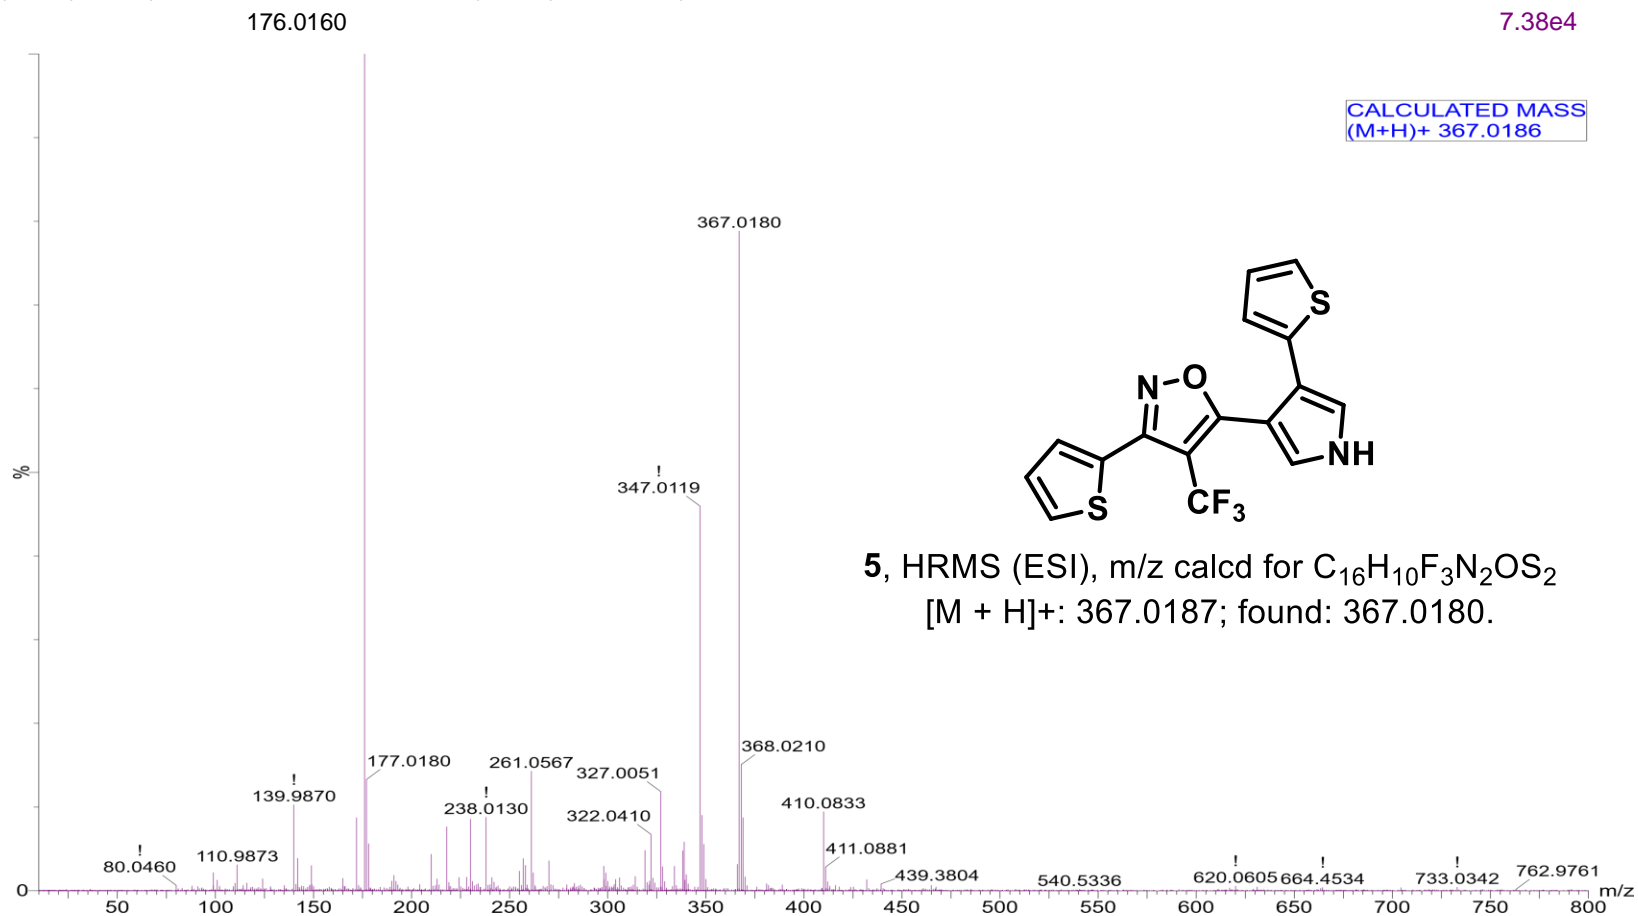

## 4. Docking

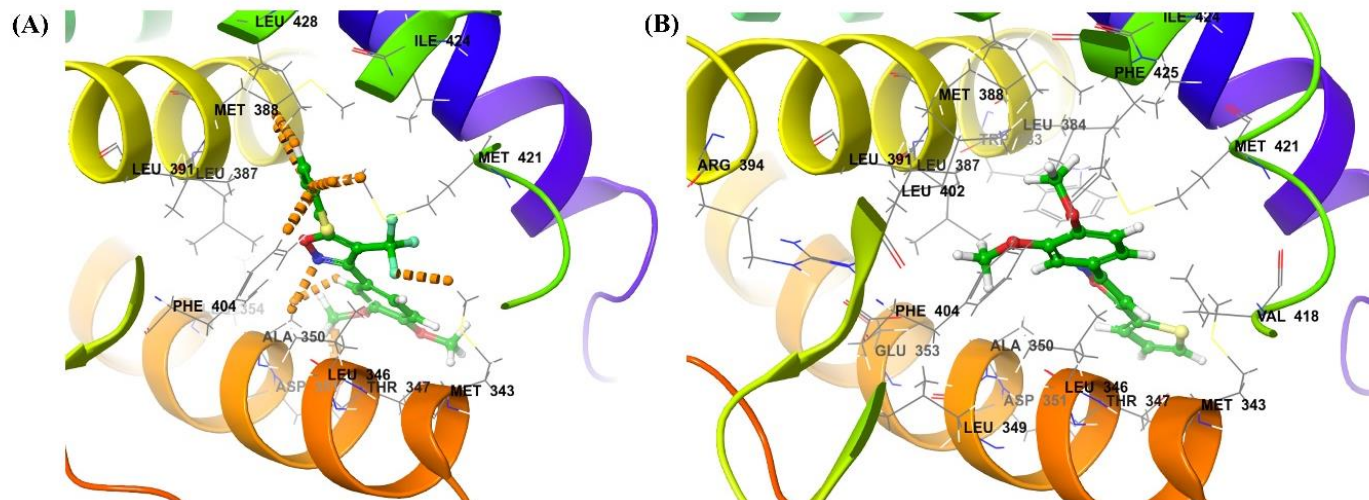

**Figure S1.** Receptor-ligand docking analysis (3D) of Compounds – (A) **2g**, and (B) **14** with HER $\alpha$ .

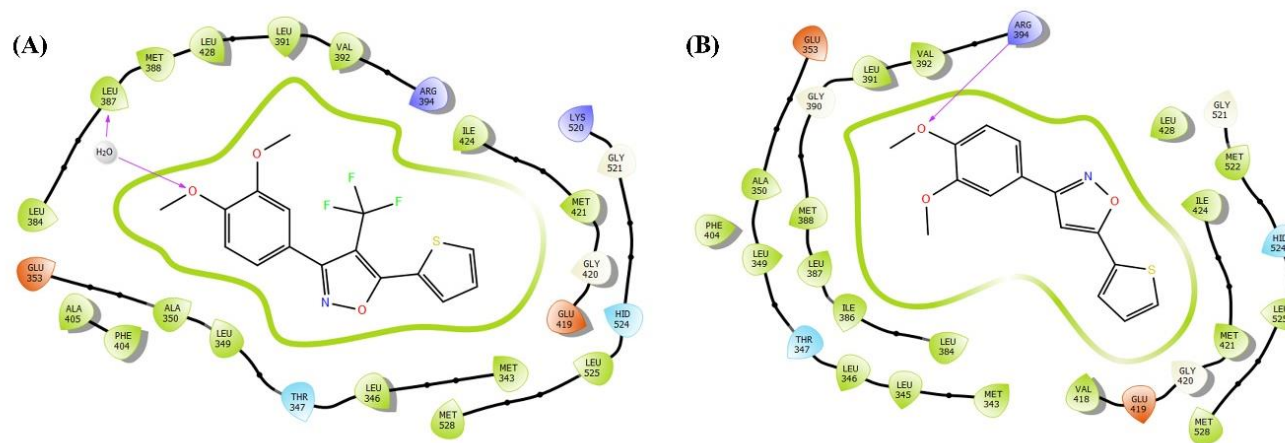

**Figure S2.** Induced fit docking (2D interaction diagram) of compounds – (A) **2g**, and (B) **14**.

## 5. References

- [1] R. Harigae, K. Moriyama, H. Togo, Preparation of 3,5-disubstituted pyrazoles and isoxazoles from terminal alkynes, aldehydes, hydrazines, and hydroxylamine, *J. Org. Chem.* 79 (2014) 2049–2058.
